# Supplementary material
Source: PubMed Central journal article supplement (PMC10733848)
Supplement: jamacardiol-e234587-s001.pdf [file jamacardiol-e234587-s001.pdf]

1  
2  
3

---

A Prospective, multicenter, Randomized, Open-label Trial to Compare  
Efficacy and Safety of Clopidogrel vs Ticagrelor in stabilized Patients with  
Acute Myocardial Infarction after Percutaneous Coronary Intervention;  
**TicAgrelor versus CLOpidogrel in Stabilized patients with Acute  
Myocardial Infarction: TALOS-AMI**

---

4  
5  
6  
7  
8  
9  
10  
11  
12  
13  
14  
15  
16  
17  
18  
19  
20  
21  
22  
23  
24

Protocol No.: TALOS-AMI  
Protocol Version: 7.0  
Development date: 2018.06.18

25

**Confidentiality Agreement**

Information in this study protocol is for investigators, clinical research coordinators, pharmacists, related administrative officers and IRB staffs of participating institutions. The following clinical trial protocol can be used only for the purpose of conducting and evaluating clinical trials and cannot be disclosed to any unrelated parties. Confidentiality should be strictly kept.

26  
27  
28  
29  
30  
31  
32  
33  
34  
35  
36  
37  
38  
39  
40  
41  
42  
43  
44  
45  
46  
47  
48  
49  
50  
51  
52  
53  
54  
55  
56  
57

## Confirmation of Clinical Trial Protocol Review

### Investigator's Signature:

I have reviewed the contents of this protocol thoroughly, and hereby confirm that the protocol is designed to verify the characteristics of the test drug and does not raise ethical concerns. I agree that the clinical trial should proceed according to the KGCP (Korea Good Clinical Practice) Standard and accept the principles of the Declaration of Helsinki. I also approve the provision of research data and regular monitoring, am prepared for audit, and inspection, and agree to keep strict confidentiality.

Title : Principal Investigator

Kiyuk Chang

\_\_\_\_\_

*Printed Name*

\_\_\_\_\_

*signature*

\_\_\_\_\_

*Date(YYYY/MM/DD)*

|    |                                                                                     |           |
|----|-------------------------------------------------------------------------------------|-----------|
| 58 | <b>Table of Contents</b>                                                            |           |
| 59 |                                                                                     |           |
| 60 |                                                                                     |           |
| 61 | <b>Confirmation of Clinical Trial Protocol Review .....</b>                         | <b>1</b>  |
| 62 | <b>Version History</b>                                                              |           |
| 63 | <b>PROTOCOL SUMMARY .....</b>                                                       | <b>5</b>  |
| 64 | <b>DEFINITION .....</b>                                                             | <b>13</b> |
| 65 | <b>TIME TABLE .....</b>                                                             | <b>14</b> |
| 66 | <b>Title and Phase of Clinical Trial.....</b>                                       | <b>16</b> |
| 67 | <b>1. Study Institution .....</b>                                                   | <b>16</b> |
| 68 | <b>2. Principal investigator, Sub-investigator and Clinical Research Cordinator</b> | <b>16</b> |
| 69 | <b>2.1. Principal Investigator .....</b>                                            | <b>16</b> |
| 70 | <b>2.2. Sub-investigator and Clinical Research Cordinator.....</b>                  | <b>16</b> |
| 71 | <b>3. Sponsor .....</b>                                                             | <b>16</b> |
| 72 | <b>4. Background and Objective .....</b>                                            | <b>16</b> |
| 73 | <b>5. Study Drug .....</b>                                                          | <b>19</b> |
| 74 | <b>6. Study Disease .....</b>                                                       | <b>20</b> |
| 75 | <b>7. Subject Inclusion/Exclusion Criteria and Study Population.....</b>            | <b>21</b> |
| 76 | <b>7.1. Subject Inclusion Criteria.....</b>                                         | <b>21</b> |
| 77 | <b>7.2. Subject Exclusion Criteria.....</b>                                         | <b>21</b> |
| 78 | <b>7.3. Study Population .....</b>                                                  | <b>22</b> |
| 79 | <b>8. Study Duration .....</b>                                                      | <b>23</b> |
| 80 | <b>9. Study Method .....</b>                                                        | <b>23</b> |
| 81 | <b>9.1. Study Process .....</b>                                                     | <b>24</b> |
| 82 | <b>9.2. Study Design.....</b>                                                       | <b>24</b> |
| 83 | <b>9.3. Randomization .....</b>                                                     | <b>24</b> |
| 84 | <b>9.4. Dosage and Method .....</b>                                                 | <b>25</b> |
| 85 | <b>9.5. Switching protocol (ticagreor to clopidogrel).....</b>                      | <b>25</b> |
| 86 | <b>9.6. Combination treatment and cautions.....</b>                                 | <b>26</b> |
| 87 | <b>10. Time table, clinical and laboratory measurement .....</b>                    | <b>27</b> |
| 88 | <b>10.1. Time table.....</b>                                                        | <b>27</b> |
| 89 | <b>10.2. Clinical and laboratory measurement.....</b>                               | <b>28</b> |
| 90 | <b>10.3. Visit schedule and assessment.....</b>                                     | <b>35</b> |
| 91 | <b>11. Precautions and Expected Side Effects.....</b>                               | <b>37</b> |
| 92 | <b>11.1. Clopidogrel.....</b>                                                       | <b>37</b> |

|     |                                                                                      |           |
|-----|--------------------------------------------------------------------------------------|-----------|
| 93  | <b>11.2. Ticagrelor .....</b>                                                        | <b>37</b> |
| 94  | <b>12. Withdrawl of conent or Loss of Follow-up.....</b>                             | <b>38</b> |
| 95  | <b>13. Event adjudication and reporting.....</b>                                     | <b>38</b> |
| 96  | <b>14. Statistical Analysis.....</b>                                                 | <b>39</b> |
| 97  | <b>14.1. General Principal of Statistical Analysis.....</b>                          | <b>39</b> |
| 98  | <b>14.2.Evaluation standard.....</b>                                                 | <b>40</b> |
| 99  | <b>14.3. Evaluation Method.....</b>                                                  | <b>41</b> |
| 100 | <b>15. Safety (including side-effects) Evaluation Standard, Method and Reporting</b> | <b>43</b> |
| 101 | <b>15.1. Safety Related Definitions.....</b>                                         | <b>43</b> |
| 102 | <b>15.2. Safety Evaluation Method .....</b>                                          | <b>43</b> |
| 103 | <b>15.3. Reporting of Adverse Event and Serious adverse Event.....</b>               | <b>45</b> |
| 104 | <b>15.4. Safety Reporting.....</b>                                                   | <b>45</b> |
| 105 | <b>16. Informed Consent.....</b>                                                     | <b>46</b> |
| 106 | <b>17. Follow-up Treatment Post Clinical Trial.....</b>                              | <b>46</b> |
| 107 | <b>18. Subject Safety and Protective Measures.....</b>                               | <b>47</b> |
| 108 | <b>18.1. Subject Safety and Protective Measures.....</b>                             | <b>47</b> |
| 109 | <b>18.2. Confidentiality.....</b>                                                    | <b>47</b> |
| 110 | <b>19. Requirements for Scientific Clinical Test.....</b>                            | <b>47</b> |
| 111 | <b>19.1. Protocol Deviation.....</b>                                                 | <b>47</b> |
| 112 | <b>19.2. Record Retention.....</b>                                                   | <b>48</b> |
| 113 | <b>19.3. Clinical Test Institution Monitoring.....</b>                               | <b>48</b> |
| 114 | <b>19.4. Investigator Responsibility.....</b>                                        | <b>48</b> |
| 115 | <b>20. Study organization.....</b>                                                   | <b>49</b> |
| 116 | <b>20.1. Steering Committe.....</b>                                                  | <b>49</b> |
| 117 | <b>20.2 Data Safety Monitoring Board (DSMB).....</b>                                 | <b>49</b> |
| 118 | <b>20.3 Clinical Events Adjudication Committe.....</b>                               | <b>50</b> |
| 119 | <b>20.4. Data Coordination.....</b>                                                  | <b>50</b> |
| 120 | <b>21. Reference.....</b>                                                            | <b>50</b> |

121  
122  
123  
124  
125  
126  
127  
128

Appendix 1) Study Institution and Personnel

129 Version History

130

| Version | Summary of Changes                                             | Authors                                   |
|---------|----------------------------------------------------------------|-------------------------------------------|
| 1.0     | Initial release                                                | Kiyuk Chang, Chan Joon Kim, Mahn-Won Park |
| 2.0     | Extension of the clinical trial period                         | Kiyuk Chang, Chan Joon Kim, Mahn-Won Park |
| 3.0     | Addition of the prescription details of in-hospital medication | Kiyuk Chang, Chan Joon Kim, Mahn-Won Park |
| 4.0     | Addition of a new institution as a clinical research institute | Kiyuk Chang, Chan Joon Kim, Mahn-Won Park |
| 5.0     | Refusal of genetic testing by one institution                  | Kiyuk Chang, Chan Joon Kim, Mahn-Won Park |
| 6.0     | Description of the change in the sample size                   | Kiyuk Chang, Chan Joon Kim, Mahn-Won Park |
| 7.0     | Extension of the clinical trial period                         | Kiyuk Chang, Chan Joon Kim, Mahn-Won Park |

131

132

133 **PROTOCOL SUMMARY**

|                                                   |                                                                                                                                                                                                                                                                                                                                                                         |
|---------------------------------------------------|-------------------------------------------------------------------------------------------------------------------------------------------------------------------------------------------------------------------------------------------------------------------------------------------------------------------------------------------------------------------------|
| <b>Title</b>                                      | A Prospective, multicenter, Randomized, Open-label Trial to Compare Efficacy and Safety of Clopidogrel vs Ticagrelor in stabilized Patients with Acute Myocardial Infarction (AMI) after Percutaneous Coronary Intervention (PCI); TicAgrelor versus CLOpidogrel in Stabilized patients with Acute Myocardial Infarction: <b>TALOS-AMI</b>                              |
| <b>Principal investigator</b>                     | Dr. Kiyuk Chang, Division of Cardiology, Department of Internal Medicine, Seoul St. Mary's Hospital, The Catholic University of Korea<br><Appendix 1><br>*Clinical Trial Investigator (CI)                                                                                                                                                                              |
| <b>Institution</b>                                | Appendix 1                                                                                                                                                                                                                                                                                                                                                              |
| <b>Study phase</b>                                | 4                                                                                                                                                                                                                                                                                                                                                                       |
| <b>Study design</b>                               | Prospective, multi-center, randomized, open trial                                                                                                                                                                                                                                                                                                                       |
| <b>Study Objective</b>                            | To investigate the efficacy and safety of switching from ticagrelor to clopidogrel in stabilized patients with AMI with no adverse events during the first month after an index PCI                                                                                                                                                                                     |
| <b>Study Drug</b>                                 | Test drug: Clopidogrel (Pregrel)<br>Control drug: Ticagrelor (Brilinta)                                                                                                                                                                                                                                                                                                 |
| <b>Study Duration</b>                             | Institutional Review Board approval (Oct. 17 <sup>th</sup> , 2013 to Dec. 31 <sup>st</sup> , 2020)                                                                                                                                                                                                                                                                      |
| <b>Study Disease</b>                              | Acute myocardial infarction: ST-segment elevation MI (STEMI) and non-ST-segment elevation MI (NSTEMI)                                                                                                                                                                                                                                                                   |
| <b>Study Population</b>                           | 2590 (loss to follow-up: 10 %)<br><ul style="list-style-type: none"> <li>• Test group: 1295</li> <li>• Control group: 1295</li> </ul>                                                                                                                                                                                                                                   |
| <b>Subject Inclusion &amp; Exclusion Criteria</b> | <b><u>Inclusion Criteria</u></b><br>1) Age ≥ 18 years<br>2) Patients with AMI (STEMI or NSTEMI) who are administered ticagrelor for 30 days after successful PCI with newer-generation drug eluting stents (DES)<br>*Definition of AMI follows the 3 <sup>rd</sup> Universal Definition of MI.<br>3) Female patients with childbearing potential who agree to mandatory |

|  |                                                                                                                                                                                                                                                                                                                                                                                                                                                                                                                                                                                                                                                                                                                                                                                                                                                                                                                                                                                                                                                                                                                                                                                                                                                                                                                                                                                                                                                                                                                                                                                                                                                                                                                                                                                                                                                                                                                                                                                                                                                                                                                                                                                                          |
|--|----------------------------------------------------------------------------------------------------------------------------------------------------------------------------------------------------------------------------------------------------------------------------------------------------------------------------------------------------------------------------------------------------------------------------------------------------------------------------------------------------------------------------------------------------------------------------------------------------------------------------------------------------------------------------------------------------------------------------------------------------------------------------------------------------------------------------------------------------------------------------------------------------------------------------------------------------------------------------------------------------------------------------------------------------------------------------------------------------------------------------------------------------------------------------------------------------------------------------------------------------------------------------------------------------------------------------------------------------------------------------------------------------------------------------------------------------------------------------------------------------------------------------------------------------------------------------------------------------------------------------------------------------------------------------------------------------------------------------------------------------------------------------------------------------------------------------------------------------------------------------------------------------------------------------------------------------------------------------------------------------------------------------------------------------------------------------------------------------------------------------------------------------------------------------------------------------------|
|  | <p>pregnancy test and have committed to using adequate contraception</p> <p>4) Subjects who agree to the study protocol and the schedule of clinical follow-up, and provides informed, written consent, as approved by the appropriate IRB of the respective institution</p> <p><b><u>Exclusion Criteria</u></b></p> <ol style="list-style-type: none"><li>1) Cardiogenic shock</li><li>2) Active internal bleeding, bleeding diathesis, or coagulopathy</li><li>3) Gastrointestinal bleeding or genitourinary bleeding, hemoptysis, or vitreous hemorrhage within 2 months</li><li>4) Major surgery within 6 weeks</li><li>5) History of intracranial bleeding, intracranial neoplasm, intracranial arteriovenous malformation, or intracranial aneurysm</li><li>6) Anemia (hemoglobin &lt; 10 g/dL) or platelet count of less than 100,000/mm<sup>3</sup> at the time of screening</li><li>7) Concomitant treatment with oral anticoagulant agent (vitamin-K antagonists or novel oral anticoagulants such as dabigatran, rivaroxaban, apixaban, or edoxaban</li><li>8) Daily treatment with non-steroidal anti-inflammatory drugs (NSAIDs) or cyclooxygenase-2 inhibitors</li><li>9) Malignancy or life expectancy of less than one year</li><li>10) Moderate or severe hepatic dysfunction (Child Pugh B or C)</li><li>11) Symptomatic patients with sinus bradycardia (sick sinus syndrome) or atrioventricular (AV) block (AV block grade II or III, bradycardia-induced syncope; except for patients implanted with permanent pacemaker)</li><li>12) Symptomatic patients with chronic obstructive pulmonary disease (Medical research council grade <math>\geq 3</math>)</li><li>13) Intolerance of or allergy to aspirin, ticagrelor or clopidogrel</li><li>14) Subjects who are under renal replacement therapy due to end-stage renal disease or who have history of kidney transplantation</li><li>15) Galactose intolerance, lactase insufficiency or glucose-galactose malabsorption</li><li>16) Subjects who are actively participating in another clinical trial within 3 months of randomization (except for observational study)</li><li>17) Pregnant and/or lactating women</li></ol> |
|--|----------------------------------------------------------------------------------------------------------------------------------------------------------------------------------------------------------------------------------------------------------------------------------------------------------------------------------------------------------------------------------------------------------------------------------------------------------------------------------------------------------------------------------------------------------------------------------------------------------------------------------------------------------------------------------------------------------------------------------------------------------------------------------------------------------------------------------------------------------------------------------------------------------------------------------------------------------------------------------------------------------------------------------------------------------------------------------------------------------------------------------------------------------------------------------------------------------------------------------------------------------------------------------------------------------------------------------------------------------------------------------------------------------------------------------------------------------------------------------------------------------------------------------------------------------------------------------------------------------------------------------------------------------------------------------------------------------------------------------------------------------------------------------------------------------------------------------------------------------------------------------------------------------------------------------------------------------------------------------------------------------------------------------------------------------------------------------------------------------------------------------------------------------------------------------------------------------|

|                                   |                                                                                                                                                                                                                                                                                                                                                                                                                                                                                                                                                                                                                                                                                                                                                                                                                                                                                                                                                                                                                                                                                                                                                                                                                                       |
|-----------------------------------|---------------------------------------------------------------------------------------------------------------------------------------------------------------------------------------------------------------------------------------------------------------------------------------------------------------------------------------------------------------------------------------------------------------------------------------------------------------------------------------------------------------------------------------------------------------------------------------------------------------------------------------------------------------------------------------------------------------------------------------------------------------------------------------------------------------------------------------------------------------------------------------------------------------------------------------------------------------------------------------------------------------------------------------------------------------------------------------------------------------------------------------------------------------------------------------------------------------------------------------|
|                                   | 18) Subjects considered unsuitable for this study by the investigator                                                                                                                                                                                                                                                                                                                                                                                                                                                                                                                                                                                                                                                                                                                                                                                                                                                                                                                                                                                                                                                                                                                                                                 |
| <p><b>Study Design</b></p>        | 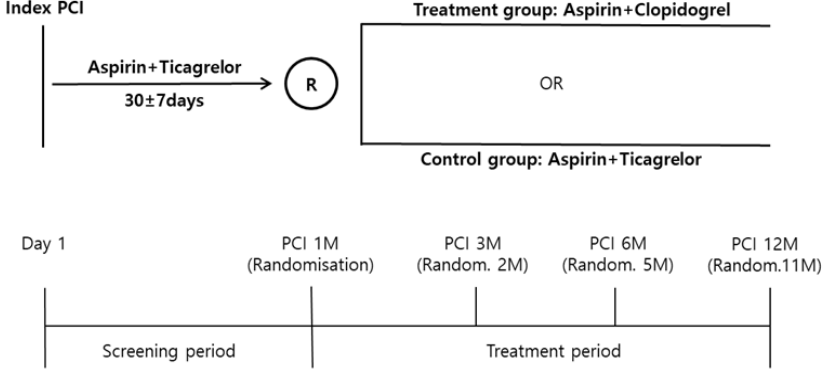 <ul style="list-style-type: none"> <li> <p><b>Screening period</b></p> <p>To conduct screening AMI patients based on the inclusion/exclusion criteria who (1) have been treated with ticagrelor+aspirin for at least 30±7 days after an index PCI, (2) received full explanation of the study details, (3) given written consent.</p> <p>To randomize eligible subjects within 30±7 days after AMI undergoing PCI with newer generation DES, and receiving aspirin and ticagrelor to the treatment and control groups in a 1:1 ratio.</p> </li> <li> <p><b>Treatment period</b></p> <p>Enrolled patients receive clopidogrel 75mg + aspirin 100 mg (treatment group) or ticagrelor 90mg bid +aspirin 100mg treatment (control group) for 11 months (post-AMI 1 month to 12 months) and evaluation safety and efficacy by conducting physical examination, checking vital sign, and collecting adverse events at post-PCI 3M, 6M, 12M visits.</p> <p>Laboratory and imaging tests, which undergo according to the medical judgment of each investigator during the study period, are collected by reviewing medical records or EMR.</p> </li> </ul> |
| <p><b>Evaluation Standard</b></p> | <p><b><u>Efficacy Test Variables</u></b></p> <p>1) Primary Endpoint (net clinical benefit)<br/>                 Composite endpoint of MACCE (CV death, MI, or stroke) + BARC bleeding (type 2, 3 or 5) between 1 and 12 months after AMI</p>                                                                                                                                                                                                                                                                                                                                                                                                                                                                                                                                                                                                                                                                                                                                                                                                                                                                                                                                                                                          |



|                                    |                                                                                                                                                                                                                                                                                                                                                                                                                                                                                                                                                                                                                                                                                                                                                                                                                                                                                                                                                                                                                                                                                                                                                                                                                                 |
|------------------------------------|---------------------------------------------------------------------------------------------------------------------------------------------------------------------------------------------------------------------------------------------------------------------------------------------------------------------------------------------------------------------------------------------------------------------------------------------------------------------------------------------------------------------------------------------------------------------------------------------------------------------------------------------------------------------------------------------------------------------------------------------------------------------------------------------------------------------------------------------------------------------------------------------------------------------------------------------------------------------------------------------------------------------------------------------------------------------------------------------------------------------------------------------------------------------------------------------------------------------------------|
|                                    | <p>2) Main Secondary Endpoints</p> <ul style="list-style-type: none"> <li>① BARC bleeding (type 2, 3, or 5) between 1 and 12 months after AMI</li> <li>② Composite endpoint of MACCE (CV death, MI, or stroke) + BARC bleeding (type 3, 5) between 1 and 12 months after AMI</li> <li>③ Composite endpoint of MACCE (CV death, MI, or stroke) between 1 and 12 months after AMI</li> </ul> <p>3) Other Secondary Endpoints</p> <ul style="list-style-type: none"> <li>① All-cause death between 1 and 12 months after AMI</li> <li>② CV death between 1 and 12 months after AMI</li> <li>③ Recurrent MI between 1 and 12 months after AMI</li> <li>④ Stroke between 1 and 12 months after AMI</li> <li>⑤ Ischemia Driven Revascularization including PCI or CABG between 1 and 12 months after AMI</li> <li>⑥ Stent thrombosis (definite or probable) between 1 and 12 months after AMI</li> </ul> <p>4) Exploratory Test Items</p> <ul style="list-style-type: none"> <li>① Lab test</li> <li>② Echocardiogram</li> <li>③ ECG</li> <li>④ Genetic test</li> </ul> <p><b><u>Safety Test Variables</u></b></p> <ul style="list-style-type: none"> <li>1) Vital sign</li> <li>2) Physical examination<br/>Adverse event</li> </ul> |
| <p><b>Statistical Analysis</b></p> | <p><b><u>Efficacy Test Variable Analysis</u></b></p> <ul style="list-style-type: none"> <li>1. Primary endpoint analysis Efficacy Test <ul style="list-style-type: none"> <li>• The non-inferiority test between 1 and 12 months after AMI will be based on the Kaplan-Meier estimates. A 95% two-sided confidence interval will be computed for the difference event rate (clopidogrel + aspirin) – event rate (ticagrelor + aspirin). The clopidogrel group will be judged as non-inferior to the ticagrelor if the upper confidence limit is less than the</li> </ul> </li> </ul>                                                                                                                                                                                                                                                                                                                                                                                                                                                                                                                                                                                                                                            |

|  |                                                                                                                                                                                                                                                                                                                                                                                                                                                                                                                                                                                                                                                                                                                                                                                                                                                                                                                                                                                                                                                                                                                                                                                                                                                                                                                                                                                                                                                                                                                                                                                                                                                                                                                                                                                                                                                                                                                                                                                                                                                                                                                                                                                                                                                                                                                                                                                                                      |
|--|----------------------------------------------------------------------------------------------------------------------------------------------------------------------------------------------------------------------------------------------------------------------------------------------------------------------------------------------------------------------------------------------------------------------------------------------------------------------------------------------------------------------------------------------------------------------------------------------------------------------------------------------------------------------------------------------------------------------------------------------------------------------------------------------------------------------------------------------------------------------------------------------------------------------------------------------------------------------------------------------------------------------------------------------------------------------------------------------------------------------------------------------------------------------------------------------------------------------------------------------------------------------------------------------------------------------------------------------------------------------------------------------------------------------------------------------------------------------------------------------------------------------------------------------------------------------------------------------------------------------------------------------------------------------------------------------------------------------------------------------------------------------------------------------------------------------------------------------------------------------------------------------------------------------------------------------------------------------------------------------------------------------------------------------------------------------------------------------------------------------------------------------------------------------------------------------------------------------------------------------------------------------------------------------------------------------------------------------------------------------------------------------------------------------|
|  | <p>predetermined non-inferiority margin of 3% (absolute risk difference).</p> <ul style="list-style-type: none"><li>The hypothesis of non-inferiority test will be based on the difference of proportions. Let <math>r_T</math> denote the true event proportion in the test arm (clopidogrel + aspirin) between 1 and 12 months, and <math>r_C</math> denote the true event proportion in the control arm (ticagrelor + aspirin) between 1 and 12 months. The hypotheses are</li></ul> $H_0: r_T - r_C \geq \Delta$ $H_A: r_T - r_C < \Delta$ <p>The <math>\Delta</math> is the non-inferiority margin, and is taken to be 0.03. The test will be performed as a one-sided test at <math>\alpha=0.05</math>.</p> <p>The null hypothesis shall be rejected at <math>\alpha=0.05</math> if the one-sided p-value is less than 0.05. When this occurs, the upper limit of the two-sided 95% confidence interval will be less than 3%.</p> <ul style="list-style-type: none"><li>If the non-inferiority analysis passed the acceptance criterion, a superiority analysis will be performed. Statistical superiority is achieved when the upper limit of the two-sided 95% confidence interval of the risk difference is less than 0%. The type I error for this analysis is protected by the non-inferiority analysis, and no alpha adjustment would be appropriate</li><li>Subgroup analyses will be performed by the primary endpoint categorized by type of AMI (STEMI vs NSTEMI), Subgroup analyses will be performed by the primary endpoint categorized by Type of AMI (STEMI vs NSTEMI), Gender, Age (<math>\geq 75</math> vs <math>&lt; 75</math>), Diabetes, LVEF (<math>\geq 40\%</math> vs <math>&lt; 40\%</math>), eGFR (<math>\geq 60</math> vs <math>&lt; 60</math>), type of implanted stents (Xience vs Resolute vs Synergy stents), Bleeding risk according to the ARC criteria (high vs low bleeding risk), CYP2C19 loss-of-function carrier status (carrier vs non-carrier).</li><li>The primary analysis population for primary and secondary endpoints will be the Intention-to-Treat (ITT) population. The primary endpoint analysis will also be performed on the Per Protocol (PP) population as subsequent analysis.</li><li>A primary endpoint analysis stratified by the institutions as a sensitivity analysis. Strata will be divided by the accrual number of institution based</li></ul> |
|--|----------------------------------------------------------------------------------------------------------------------------------------------------------------------------------------------------------------------------------------------------------------------------------------------------------------------------------------------------------------------------------------------------------------------------------------------------------------------------------------------------------------------------------------------------------------------------------------------------------------------------------------------------------------------------------------------------------------------------------------------------------------------------------------------------------------------------------------------------------------------------------------------------------------------------------------------------------------------------------------------------------------------------------------------------------------------------------------------------------------------------------------------------------------------------------------------------------------------------------------------------------------------------------------------------------------------------------------------------------------------------------------------------------------------------------------------------------------------------------------------------------------------------------------------------------------------------------------------------------------------------------------------------------------------------------------------------------------------------------------------------------------------------------------------------------------------------------------------------------------------------------------------------------------------------------------------------------------------------------------------------------------------------------------------------------------------------------------------------------------------------------------------------------------------------------------------------------------------------------------------------------------------------------------------------------------------------------------------------------------------------------------------------------------------|

|  |                                                                                                                                                                                                                                                                                                                                                                                                                                                                                                                                                                                                                                                                                                                                                                                                                                                                                                                                                                                                                                                                                                                                                                                                                                                                                                                                                                                                                                                                                                                                                                                                                                                                                                                                                                                                                                                                                                                                                                                                                                                                                                                                                                                                                                                                                                                                                                                                |
|--|------------------------------------------------------------------------------------------------------------------------------------------------------------------------------------------------------------------------------------------------------------------------------------------------------------------------------------------------------------------------------------------------------------------------------------------------------------------------------------------------------------------------------------------------------------------------------------------------------------------------------------------------------------------------------------------------------------------------------------------------------------------------------------------------------------------------------------------------------------------------------------------------------------------------------------------------------------------------------------------------------------------------------------------------------------------------------------------------------------------------------------------------------------------------------------------------------------------------------------------------------------------------------------------------------------------------------------------------------------------------------------------------------------------------------------------------------------------------------------------------------------------------------------------------------------------------------------------------------------------------------------------------------------------------------------------------------------------------------------------------------------------------------------------------------------------------------------------------------------------------------------------------------------------------------------------------------------------------------------------------------------------------------------------------------------------------------------------------------------------------------------------------------------------------------------------------------------------------------------------------------------------------------------------------------------------------------------------------------------------------------------------------|
|  | <p>on quartiles.</p> <p>Implement noninferiority validation based on the tolerance limit after collecting cumulative occurrence rate of MACCE (CV death, MI, stroke) + BARC bleeding (type 2, 3, or 5) post 1M-1Y PCI and checking 95% confidence interval of [Ticagrelor occurrence rate – Clopidogrel occurrence rate]. If the upper value of the 95% confidence interval is less than 3% of the noninferiority tolerance limit, Clopidogrel is perceived noninferior to Ticagrelor. Present the cumulative limit method, Kaplan-Meier curve and conduct log-rank test to check the difference between two groups.</p> <p>2. Main Secondary Endpoint Analyses</p> <ul style="list-style-type: none"> <li>• The secondary endpoints will be composed of two families. The first family consists of the composite endpoint of MACCE (CV death, MI, stroke) plus BARC bleeding (type 2, 3, or 5). The second family will consist of MACCE plus BARC bleeding (type 3, or 5), MACCE, and BARC bleeding (type 2, 3, or 5). The endpoints from the second family will be tested hierarchically, thereby maintaining the study-wise alpha level. These secondary endpoints will only be tested if both the primary composite endpoint and BARC bleeding are significant at non-inferiority analysis, and superiority analysis. Composite endpoint of MACCE plus BARC bleeding (type 3, or 5) will be tested first, and only if this is significant, the composite endpoint of MACCE only will be tested afterwards. BARC bleeding (type 2, 3, or 5) will be tested only if both of the above endpoints are tested significant.</li> </ul> <p>3. Exploratory Test Variable</p> <p>For continuous data, present technical statistics (mean, standard deviation, median, min. and max. value) on the changes between base &amp; each visits. Based on whether the data follow normal distribution, comparatively verify between the two groups using the independent t-test or Wilcoxon's rank sum test. Also, for comparison within each group, analyze using the paired t-test or Wilcoxon's signed rank test. For categorical data, present technical statistics (frequency, percentage) and comparatively verify between groups using the chi-square test or Fisher's exact test.</p> <p>4. Additional analysis should be run including all occurred events if the drug is given continuously.</p> |
|--|------------------------------------------------------------------------------------------------------------------------------------------------------------------------------------------------------------------------------------------------------------------------------------------------------------------------------------------------------------------------------------------------------------------------------------------------------------------------------------------------------------------------------------------------------------------------------------------------------------------------------------------------------------------------------------------------------------------------------------------------------------------------------------------------------------------------------------------------------------------------------------------------------------------------------------------------------------------------------------------------------------------------------------------------------------------------------------------------------------------------------------------------------------------------------------------------------------------------------------------------------------------------------------------------------------------------------------------------------------------------------------------------------------------------------------------------------------------------------------------------------------------------------------------------------------------------------------------------------------------------------------------------------------------------------------------------------------------------------------------------------------------------------------------------------------------------------------------------------------------------------------------------------------------------------------------------------------------------------------------------------------------------------------------------------------------------------------------------------------------------------------------------------------------------------------------------------------------------------------------------------------------------------------------------------------------------------------------------------------------------------------------------|

**Safety Test Variable Analysis**

## 1. Adverse Event

Should be conducted for all adverse events occurred during clinical test. Summarize adverse event occurrence rate, occurrence rate of specific adverse event causing discontinuation of drugs or loss to follow-up and occurrence rate of critical adverse event. Adverse event occurrence rate includes all adverse event occurrence rate and occurrence rate of adverse event related to the clinical test drug.

## 2. Vital Sign, Physical Examination

For continuous data, present technical statistics (mean, standard deviation, median, min. and max. value) on the changes between base & each visits. Based on whether the data follow normal distribution, comparatively verify between the two groups using the independent t-test or Wilcoxon's rank sum test. Also, for comparison within each group, analyze using the paired t-test or Wilcoxon's signed rank test. For categorical data, present technical statistics (frequency, percentage) and comparatively verify between groups using the chi-square test or Fisher's exact test.

**(interim analysis is not performed.)**

**Analysis Population**

## 1. The Intent to Treat (ITT) Population

The ITT population is defined as all randomized patients at 1 month after AMI, regardless of their adherence with the entry criteria, regardless of treatment they actually received, and regardless of subsequent withdrawal from treatment or deviation from the protocol<sup>19</sup>. Only some specific reasons that might cause an exclusion of a patient from the ITT population:

- No treatment was applied at all
- No data are available after randomization

## 2. The Per Protocol (PP) Population

The PP population is the subset of ITT population consisting of all patients who receive and retain the treatment during 12 months after PCI<sup>19</sup>. Some specific reasons that might cause an exclusion of a patient from the PP population:

- Violation of entry criteria including inclusion and exclusion criteria
- Withdrawal of consent

|  |                                                                                                                                                                                                                                                                                                                                                                                                                                                                                                                                                                                                                                                                                                    |
|--|----------------------------------------------------------------------------------------------------------------------------------------------------------------------------------------------------------------------------------------------------------------------------------------------------------------------------------------------------------------------------------------------------------------------------------------------------------------------------------------------------------------------------------------------------------------------------------------------------------------------------------------------------------------------------------------------------|
|  | <ul style="list-style-type: none"><li>● Concomitant treatment of oral anticoagulant agent (vitamin-K antagonists or novel oral anticoagulants such as dabigatran, rivaroxaban, apixaban, or edoxaban) during the study period</li><li>● Poor compliance<ul style="list-style-type: none"><li>- Conversion from ticagrelor + aspirin to clopidogrel + aspirin during RCT procedure and vice versa</li><li>- Discontinuation of test or control drugs for 7 days or longer</li></ul></li></ul> <p>3) * In the cases of withdrawal of consent, concomitant treatment of oral anticoagulation agent and poor compliance, their data will be used for statistical analyses until such events occur.</p> |
|  |                                                                                                                                                                                                                                                                                                                                                                                                                                                                                                                                                                                                                                                                                                    |

135 **DEFINITION**

136

|             |                                                                                                                                            |
|-------------|--------------------------------------------------------------------------------------------------------------------------------------------|
| A           | Peak late diastolic velocity                                                                                                               |
| AE          | Adverse Event                                                                                                                              |
| ADP         | Adenosine diphosphate                                                                                                                      |
| AST         | Aspartate aminotransferase                                                                                                                 |
| ALT         | Alanine aminotransferase                                                                                                                   |
| BARC        | Bleeding Academic Research Consortium                                                                                                      |
| CABG        | Coronary Artery Bypass Graft surgery                                                                                                       |
| CRO         | Contract Research Organization                                                                                                             |
| DES         | Drug Eluting Stent                                                                                                                         |
| DT          | Deceleration time                                                                                                                          |
| E           | Peak early diastolic velocity                                                                                                              |
| E'          | Early diastolic velocity of mitral annulus                                                                                                 |
| EF          | Ejection fraction                                                                                                                          |
| GCP         | Good Clinical Practice                                                                                                                     |
| Hb          | Hemoglobin                                                                                                                                 |
| IRB         | Institutional Review Board                                                                                                                 |
| ITT         | Intent-To-Treat                                                                                                                            |
| IWRS        | Interactive web-based response system                                                                                                      |
| LVEDV       | Left Ventricle end-diastolic volume                                                                                                        |
| LVESV       | Left Ventricle end-systolic volume                                                                                                         |
| MACCE       | Major Adverse Cardiac and Cerebrovascular event                                                                                            |
| MI          | Myocardial Infarction                                                                                                                      |
| NSTEMI      | Non-ST Elevation Myocardial Infarction                                                                                                     |
| PCI         | Percutaneous Coronary Intervention                                                                                                         |
| PLATO       | A study of PLATelet inhibition and Patient Outcomes                                                                                        |
| PP          | Per Protocol                                                                                                                               |
| RVSP        | Right Ventricular systolic pressure                                                                                                        |
| SAE         | Serious Adverse event                                                                                                                      |
| STEMI       | ST Elevation Myocardial Infarction                                                                                                         |
| TRITON-TIMI | TRial to Assess Improvement in Therapeutic Outcomes by Optimizing Platelet Inhibition with Prasugrel–Thrombolysis In Myocardial Infarction |

137

138

139 **TIME TABLE**

| Schedule of Measurements                     |                      | Screening           | Baseline              | Treatment         |                   |                     |
|----------------------------------------------|----------------------|---------------------|-----------------------|-------------------|-------------------|---------------------|
|                                              |                      | V1                  | V2                    | V3                | V4                | V5                  |
|                                              |                      | -30D ~ -1D<br>(PCI) | 1D*<br>(PCI ±30 days) | 2M†<br>(PCI ± 3M) | 5M†<br>(PCI ± 6M) | 11M‡<br>(PCI ± 12M) |
| Informed Consent                             |                      | ●                   |                       |                   |                   |                     |
| Demographics                                 |                      | ●                   |                       |                   |                   |                     |
| Physical Examination <sup>1)</sup>           |                      | ●                   | ●                     | ●                 | ●                 | ●                   |
| Medical History                              |                      | ●                   |                       |                   |                   |                     |
| Current Medication                           |                      | ●                   |                       |                   |                   |                     |
| Dyspnea Evaluation                           |                      | ●                   | ●                     | ●                 | ●                 | ●                   |
| Subject Suitability Test                     |                      | ●                   | ●                     |                   |                   |                     |
| Pregnancy Test <sup>2)</sup>                 |                      | ●                   |                       |                   |                   |                     |
| Randomization                                |                      |                     | ●                     |                   |                   |                     |
| Efficacy Test <sup>3)</sup>                  |                      |                     | ●                     | ●                 | ●                 | ●                   |
| Exploratory Test <sup>4)</sup>               |                      | ●                   | ●                     | ●                 | ●                 | ●                   |
| Safety Test                                  | Vital Sign           | ●                   | ●                     | ●                 | ●                 | ●                   |
|                                              | Physical Examination | ●                   | ●                     | ●                 | ●                 | ●                   |
|                                              | Adverse Event Test   |                     | ●                     | ●                 | ●                 | ●                   |
| Investigational Product Prescription         |                      |                     | ●                     | ●                 | ●                 |                     |
| Investigational Product Adherence Assessment |                      |                     |                       | ●                 | ●                 | ●                   |
| Concomitant Medication Change Test           |                      |                     | ●                     | ●                 | ●                 | ●                   |

140

141 \*: Post PCI 30 days ±7 days

142 †: ±14 days permitted from identified date. Call possible if visits are not feasible. Identify in Case Report Form

143 ‡ :- 14 days ~ + 30 days permitted from identified date. Call possible if visits are not feasible. Identify in Case Report Form.

144 1) Measure weight at each visit

145 2) Pregnancy Test: Conduct urine β-HCG test among fertile women who have not identified menopause (no period for 12M or longer)

146 3) Efficacy Test: Stroke, BARC bleeding (type 2, 3, or 5), Cardiac death, Death from any cause, Death from vascular cause, Acute MI, Stent thrombosis, Ischemia Driven Revascularization

148 4) Exploratory Endpoint: Lab Test, Cardiac Echo, ECG, Genetic Test (Optional)

- 149 i. Lab Test
- 150 ① Blood Test: WBC, Neutrophil, Lymphocytes, Hemoglobin, Platelet, ESR
- 151 ② Blood Coagulation Test: INR, Fibrinogen
- 152 ③ Blood Chemical Test: Glucose, Creatinine, AST, ALT, Total bilirubin, Alkaline phosphatase,  $\gamma$ -GTP, Calcium, Phosphorus, LDH,
- 153 CPK, Uric acid, Total cholesterol, Triglyceride, HDL-cholesterol, LDL-cholesterol, hsCRP
- 154 ④ Glycosylated hemoglobin
- 155 ⑤ Platelet Function Test: VerifyNow, PFA-100/200
- 156 ⑥ Myocardial Damage Index Test
- 157 ⑦ Thyroid Function Test
- 158 ⑧ Kidney Function Test: Cockcroft-Gault eCCr, MDRD eGFR
- 159 • Cockcroft-Gault eCCr (ml/min) =  $(140 - \text{age}) * (\text{Weight in kg}) / (72 * \text{SCr}) * (0.85 \text{ for women})$
- 160 • MDRD eGFR(mL/min/1.73m<sup>2</sup>) =  $186 * (\text{SCr})^{-1.154} * (\text{Age})^{-0.203} * 0.742(\text{for women})$
- 161 ii. Cardiac Echo
- 162 iii. ECG
- 163 5) Institution conducting genetic tests for analysis should receive subject consent form (Optional).
- 164



165 **Title and Phase of Clinical Trial**

166 A Prospective, multicenter, Randomized, Open-label Trial to Compare Efficacy and Safety of  
167 Clopidogrel vs Ticagrelor in stabilized Patients with Acute Myocardial Infarction (AMI) after  
168 Percutaneous Coronary Intervention (PCI); TicAgrelor versus **CLO**pidogrel in Stabilized patients  
169 with **A**cute **M**yocardial Infarction: **TALOS-AMI**

170

171 **Phase 4**

172

173 **1. Study Institution**

174 <Appendix 1> Reference

175

176

177 **2. Principal investigator, Sub-investigator and Clinical Research**  
178 **Coordinator**

179 **2.1. Principal investigator**

| Name         | Institution                                                 | Specialty (Division) | Position  |
|--------------|-------------------------------------------------------------|----------------------|-----------|
| Kiyuk Chang* | Seoul St. Mary's Hospital, The Catholic University of Korea | Cardiology           | Professor |

180 \*Coordinating Investigator (CI) of Clinical Trial

181

182 **2.2. Sub-investigator and Clinical Research Coordinator**

183 <Appendix 1> Reference

184

185

186 **3. Sponsor**

187 Seoul St. Mary's Hospital, 06591, 222 Banpo-daero, Seocho-gu, Seoul

188

189

190 **4. Background and Objective**

191

192 **4.1. Objective**

193 To investigate the efficacy and safety of switching from ticagrelor to clopidogrel in stabilized patients  
194 with AMI with no adverse events during the first month after an index PCI

195

196 **4.2. Background**

197 In AMI, adequate platelet inhibition is essential to reduce the risk of recurrent thrombotic events.  
198 For this reason, dual antiplatelet therapy (DAPT) with aspirin and a P2Y12 inhibitor has become the  
199 current mainstay of pharmacological treatment in AMI patients managed with PCI. Although,  
200 clopidogrel has an indication for use in AMI<sup>1</sup>, potent P2Y12 inhibitors, ticagrelor and prasugrel,  
201 compared with clopidogrel have shown significantly improved clinical outcomes in terms of reducing  
202 recurrent ischemic events in large randomized trials<sup>2,3</sup>. Thus, current guidelines strongly  
203 recommended potent P2Y12 inhibitors for 1 year in AMI patients undergoing PCI<sup>1</sup>.

204 However, along with strong anti-platelet efficacy, a higher risk for bleeding was observed for  
205 potent P2Y12 inhibitors compared with clopidogrel in these randomized trials. Intriguingly, benefit  
206 due to reduction of ischemic events and harm due to bleeding events predominates at different time  
207 points during potent P2Y12 inhibitors treatment<sup>4</sup>. Although the ischemic benefit was consistent  
208 throughout the first year after the index event, the benefit of ticagrelor and prasugrel over  
209 clopidogrel for reducing thrombotic risk was prominent in the early period after acute coronary  
210 syndrome (ACS) when the risk of ischemic complications was highest. In the primary PCI cohort of  
211 the PLATO (Platelet Inhibition and Patient Outcomes) trial, ticagrelor showed larger risk reduction  
212 for stent thrombosis (ST) during the first 30days of treatment compared with clopidogrel but the  
213 difference decreased over time<sup>5</sup>. Similarly, in the TRITON-TIMI (Therapeutic Outcomes by  
214 Optimising Platelet Inhibition with Prasugrel-Thrombolysis In Myocardial Infarction) 38 trial,  
215 prasugrel led to a 25% reduction in MI during the first month<sup>6</sup>. On the other hands, the opposite was  
216 true for bleeding. Landmark analyses of these two randomized trials revealed that the bleeding risk  
217 was similar in the early period of treatment, but there was a larger difference during the chronic  
218 period of treatment between potent P2Y12 inhibitors and clopidogrel. Actually most bleeding events  
219 predominantly occurred during the maintenance period of treatment<sup>7,8</sup>. As a consequence, to  
220 optimize net clinical benefit between early ischemic benefit and late bleeding risks in AMI patients,  
221 many physicians have focused on the novel therapeutic strategy of stepwise de-escalation using  
222 potent P2Y12 inhibitors only in the acute phase of treatment (during the first 30 days) and using the  
223 less potent clopidogrel during the chronic phase of treatment (after the first 30 days).

224 Despite of the evidence for the consistent efficacy and safety of potent P2Y12 inhibitors with  
225 long-term treatment, de-escalation after ACS is quite common in clinical practice<sup>9-12</sup>. Data have  
226 shown that the prevalence of de-escalation during hospitalization ranges from 5% to 14%<sup>10,11</sup> and  
227 after discharge ranges from 15% to 28%<sup>12</sup>. However, at present, data from large-scale clinical  
228 studies on the topic of de-escalating antiplatelet strategy are very limited and the results of small  
229 studies are conflicting<sup>9,13</sup>. Recently, some randomized trials of de-escalation enrolling ACS patients  
230 have been reported<sup>13,14</sup>. The randomized, open-label, single-center TOPIC trial (Timing of Optimal

231 Platelet Inhibition After Acute Coronary Syndrome) showed that in patients who have been event  
232 free for the first month after an ACS on a combination of aspirin plus a potent P2Y12 inhibitor  
233 (ticagrelor or prasugrel), de-escalation to aspirin plus clopidogrel strategy was associated with  
234 reduction of bleeding complications without increase in ischemic events<sup>13</sup>. Although this study did  
235 not show any differences in ischemic events between groups, play of chance cannot be ruled out  
236 given the limited sample size of the trial<sup>15</sup>. The open-label, multicenter TROPICAL-ACS trial (Testing  
237 Responsiveness to Platelet Inhibition Chronic Antiplatelet Treatment for ACS) randomized patients  
238 with ACS undergoing PCI to either standard treatment with prasugrel for 12 months or a de-  
239 escalation regimen (1 week of prasugrel followed by 1 week of clopidogrel and platelet function  
240 testing [PFT]–guided maintenance therapy with clopidogrel or prasugrel from day 14 after hospital  
241 discharge)<sup>14</sup>. The trial showed that a strategy of PFT-guided de-escalation of antiplatelet treatment  
242 was noninferior to standard treatment with prasugrel at 1 year in terms of net clinical benefit. The  
243 PFT-guided de-escalation strategy did not show any increase in ischemic events, although there  
244 was not a statistically significant reduction in bleeding. However, some experts expressed concerns  
245 about a lack of power due to the low number of endpoint events<sup>16</sup>. Furthermore, the routine use of  
246 PFT in ACS patients undergoing PCI is limited because it is not widely available in real world clinical  
247 practice. And, although prasugrel and ticagrelor have similar levels of platelet inhibition, it might be  
248 argued that the study findings cannot be applied to ticagrelor because its pleiotropic effects have  
249 been advocated to contribute to its overall benefits<sup>17</sup>. In addition, there are no studies for the de-  
250 escalation of antiplatelet treatment enrolling only AMI patients treated by PCI with newer generation  
251 DES. In PLATO study, only 60% of population were scheduled for PCI and the patients who  
252 underwent PCI received older generation DES.

253 Therefore, we sought to investigate the efficacy and safety of switching from ticagrelor to  
254 clopidogrel in AMI patients with no adverse event during the first month after index PCI with second  
255 generation DES.

256

257 **5. Study Drug**

258 **5.1. Test Drug**

|                           |                                                                                                                                                                                                                      |
|---------------------------|----------------------------------------------------------------------------------------------------------------------------------------------------------------------------------------------------------------------|
| Test Product              | Pregrel                                                                                                                                                                                                              |
| Component                 | Clopidogrel resinate 150mg (75mg as)                                                                                                                                                                                 |
| Description and dose form | Pinkish film coated circular pill                                                                                                                                                                                    |
| Storage Method            | Air tight container, room temperature (1~30°C)                                                                                                                                                                       |
| Efficacy and Effect       | Improvement of clinical outcomes (cardiovascular death, myocardial infarction, stroke, refractory ischemia) in patients with acute coronary syndrome patients who are medically treated or have received PCI or CABG |

259

260 **5.2. Comparator**

|                           |                                                                                                                                                                                                                                    |
|---------------------------|------------------------------------------------------------------------------------------------------------------------------------------------------------------------------------------------------------------------------------|
| Test Product              | Brilinta                                                                                                                                                                                                                           |
| Component                 | Ticagrelor 90mg                                                                                                                                                                                                                    |
| Description and dose form | Yellowish film coated pill with convex sides                                                                                                                                                                                       |
| Storage Method            | Air tight container, room temperature (1~30°C)                                                                                                                                                                                     |
| Efficacy and Effect       | Reduction of thromboembolic cardiovascular event (cardiovascular death, myocardial infarction, or stroke) in patients with acute coronary syndrome who are planned to receive pharmacotherapy, PCI or CABG in addition to aspirin. |

261

262

263 **6. Study Disease**

264 Acute Myocardial Infarction

265

266 **<3<sup>rd</sup> Universal Definition of Myocardial Infarction><sup>18</sup>**

267

**\_Criteria for acute myocardial infarction**

The term acute myocardial infarction (MI) should be used when there is evidence of myocardial necrosis in a clinical setting consistent with acute myocardial ischemia.

Under these conditions any one of the following criteria meets the diagnosis for MI:

- Detection of a rise and/or fall of cardiac biomarker values [preferably cardiac troponin (cTn)] with at least one value above the 99th percentile upper reference limit (URL) and with at least one of the following:
  - Symptoms of ischemia.
  - New or presumed new significant ST-segment–T wave (ST–T) changes or new left bundle branch block (LBBB).
  - Development of pathological Q waves in the ECG.
  - Imaging evidence of new loss of viable myocardium or new regional wall motion abnormality.
  - Identification of an intracoronary thrombus by angiography or autopsy.
- Cardiac death with symptoms suggestive of myocardial ischemia and presumed new ischemic ECG changes or new LBBB, but death occurred before cardiac biomarkers were obtained, or before cardiac biomarker values would be increased.
- Percutaneous coronary intervention (PCI) related MI is arbitrarily defined by elevation of cTn values ( $\geq 5 \times$  99th percentile URL) in patients with normal baseline values ( $\leq$  99th percentile URL) or a rise of cTn values  $\geq 20\%$  if the baseline values are elevated and are stable or falling. In addition, either (i) symptoms suggestive of myocardial ischemia or (ii) new ischemic ECG changes or (iii) angiographic findings consistent with a procedural complication or (iv) imaging demonstration of new loss of viable myocardium or new regional wall motion abnormality are required.
- Stent thrombosis associated with MI when detected by coronary angiography or autopsy in the setting of myocardial ischemia and with a rise and/or fall of cardiac biomarker values with at least one value above the 99th percentile URL.
- Coronary artery bypass grafting (CABG) related MI is arbitrarily defined by elevation of cardiac biomarker values ( $>10 \times$  99th percentile URL) in patients with normal baseline

cTn values ( $\leq$ 99th percentile URL). In addition, either (i) new pathological Q waves or new LBBB, or (ii) angiographic documented new graft or new native coronary artery occlusion, or (iii) imaging evidence of new loss of viable myocardium or new regional wall motion abnormality.

268

## 269 **7. Inclusion/Exclusion Criteria & Study Population**

### 270 **7.1. Subject Inclusion Criteria**

271 Subject should meet all of the following criteria.

- 272 1) Age  $\geq$  18 years
- 273 2) Patients with AMI (STEMI or NSTEMI) who are administered aspirin and ticagrelor for 30 days  
274 after successful PCI with newer-generation drug eluting stents (DES)  
275 \*Definition of AMI follows the 3<sup>rd</sup> Universal Definition of MI.
- 276 3) Female patients with childbearing potential who agree to mandatory pregnancy test and have  
277 committed to using adequate contraception
- 278 4) Subjects who agree to the study protocol and the schedule of clinical follow-up, and provides  
279 informed, written consent, as approved by the appropriate IRB of the respective institution

280

### 281 **7.2. Subject Exclusion Criteria**

282 Subject should be excluded if they apply to any of the following criteria.

- 283 1) Cardiogenic shock
- 284 2) Active internal bleeding, bleeding diathesis, or coagulopathy
- 285 3) Gastrointestinal bleeding or genitourinary bleeding, hemoptysis, or vitreous hemorrhage within  
286 2 months
- 287 4) Major surgery within 6 weeks
- 288 5) History of intracranial bleeding, intracranial neoplasm, intracranial arteriovenous malformation,  
289 or intracranial aneurysm
- 290 6) Anemia (hemoglobin  $<$  10 g/dL) or platelet count of less than 100,000/mm<sup>3</sup> at the time of  
291 screening
- 292 7) Concomitant treatment with oral anticoagulant agent (vitamin-K antagonists or novel oral  
293 anticoagulants such as dabigatran, rivaroxaban, apixaban, or edoxaban)
- 294 8) Daily treatment with non-steroidal anti-inflammatory drugs (NSAIDs) or cyclooxygenase-2  
295 inhibitors
- 296 9) Malignancy or life expectancy of less than one year
- 297 10) Moderate or severe hepatic dysfunction (Child Pugh B or C)

- 298 11) Symptomatic patients with sinus bradycardia (sick sinus syndrome) or atrioventricular (AV)  
 299 block (AV block grade II or III, bradycardia-induced syncope; except for patients implanted with  
 300 permanent pacemaker)
- 301 12) Symptomatic patients with chronic obstructive pulmonary disease (Medical research council  
 302 grade  $\geq 3$ )
- 303 13) Intolerance of or allergy to aspirin, ticagrelor or clopidogrel
- 304 14) Subjects who are under renal replacement therapy due to end-stage renal disease or who have  
 305 history of kidney transplantation
- 306 15) Galactose intolerance, lactase insufficiency or glucose-galactose malabsorption
- 307 16) Subjects who are actively participating in another clinical trial with 3 months of randomization  
 308 (except for observational study)
- 309 17) Pregnant and/or lactating women
- 310 18) Subjects considered unsuitable for this study by the investigator

311

### 312 7.3. Study Population

#### 313 7.3.1. Sample Size

|                                     | Test | Control | Total Sample Size |
|-------------------------------------|------|---------|-------------------|
| No. of efficacy case                | 1165 | 1165    | 2330              |
| Including follow-up loss rate (10%) | 1295 | 1295    | 2590              |

314

#### 315 7.3.2. Sample Size Estimation

316 The present study is designed to show noninferiority of the treatment group with aspirin plus  
 317 clopidogrel versus the control group with aspirin plus ticagrelor. Sample size is based on the  
 318 combined occurrence rate of ischemic and bleeding events between 1 and 12 months after AMI.  
 319 According to the PLATO investigators, the event rate of primary efficacy endpoint including CV  
 320 death, MI or stroke was 5.28% in the ticagrelor group and 6.60% in the clopidogrel group between  
 321 1 and 12 months after the index event<sup>2</sup>. In the meantime, since there were no reported data on the  
 322 bleeding event rate associated with ticagrelor from 1 to 12 months after AMI, especially BARC  
 323 bleeding rate at the time of the present study design, we assumed the event rate of BARC 2, 3 and  
 324 5 bleeding from the event rates of non-CABG related PLATO major or minor bleeding during a year  
 325 of ticagrelor therapy (8.7%) and non-CABG related major bleeding of first 30 days (2.47%) and after  
 326 30 days (2.17%) in the PLATO trial. For the event rate of BARC 2, 3 and 5 bleeding associated with  
 327 clopidogrel from 1 to 12 months after AMI, the event rate was assumed from the event rates of non-  
 328 CABG related PLATO major or minor bleeding during a year of clopidogrel therapy (7.0%) and non-

329 CABG related major bleeding of first 30 days (2.21%) and after 30 days (1.65%) in the clopidogrel  
330 group of the PLATO trial<sup>7</sup>. We applied mathematical formula for the estimation of the event rate of  
331 BARC 2, 3, 5 bleeding from the event rates of non-CABG related PLATO major or minor bleeding:

332 “In the ticagrelor group

333 non-CABG major bleeding first 30 days : non-CABG major bleeding after 30days = 2.47 : 2.17

334 non-CABG total bleeding first 30 days : non-CABG total bleeding after 30days = (8.7-  $\chi$ ) :  $\chi$

335 
$$2.47:2.17 = (8.7- \chi) : \chi$$

336 
$$\chi = 4.07\%$$

337 In the clopidogrel group

338 non-CABG major bleeding first 30 dasy : non-CABG major bleeding after 30 days = 2.21:1.65

339 non-CABG total bleeding first 30 days : non-CABG total bleeding after 30 days = (7.0-  $\chi$ ) :  $\chi$

340 
$$2.21:1.65 = (7.0- \chi) : \chi$$

341 
$$\chi = 2.99\%$$

342 After applying mathematical formula, the estimated BARC 2, 3 and 5 bleeding would be 4.07% in  
343 the ticagrelor group and 2.99% in the clopidogrel group. Thus, the expected event rate of the  
344 primary endpoint from 1 to12 months after index PCI was 9.35% (ischemic event of 5.28% +  
345 bleeding event of 4.07%) in the ticagrelor group and 9.59% (ischemic event of 6.6% + bleeding  
346 event of 2.99%) in the clopidogrel group. We chose the noninferiority margin in accordance with  
347 clinical judgment and other relevant studies with a noninferiority design at the present study design.  
348 The noninferiority margin of two contemporary trials of antiplatelet treatment after PCI that were  
349 available up to that time was equivalent to a 40% increase in the expected event rate<sup>18, 19</sup>. The  
350 steering committee decided that the noninferiority margin in our study should be less than a 40%  
351 increase compared to the expected event rate of the control group. After considering clinically  
352 acceptable relevance and the feasibility of study recruitment, we finally selected the noninferiority  
353 margin of 3.0%, which was equivalent to a 32% increase in the expected event rate. Sample size  
354 calculations (PASS 13, NCSS, LLC, Kaysville, Utah, USA) were performed based on one-sided  $\alpha$  of  
355 0.05 and a power of 80 %. To achieve these goals, a total of 2,230 patients were needed. After  
356 considering a follow-up loss rate of 10%, a total of 2,590 (1,295 patients in each group) patients  
357 were required.

358

## 359 **8. Study Duration**

360 IRB approval to Dec. 31<sup>st</sup>, 2020

361

## 362 **9. Study Method**



363 **9.1. Study Process**

364 Phase IV

365

366 **9.2. Study Design**

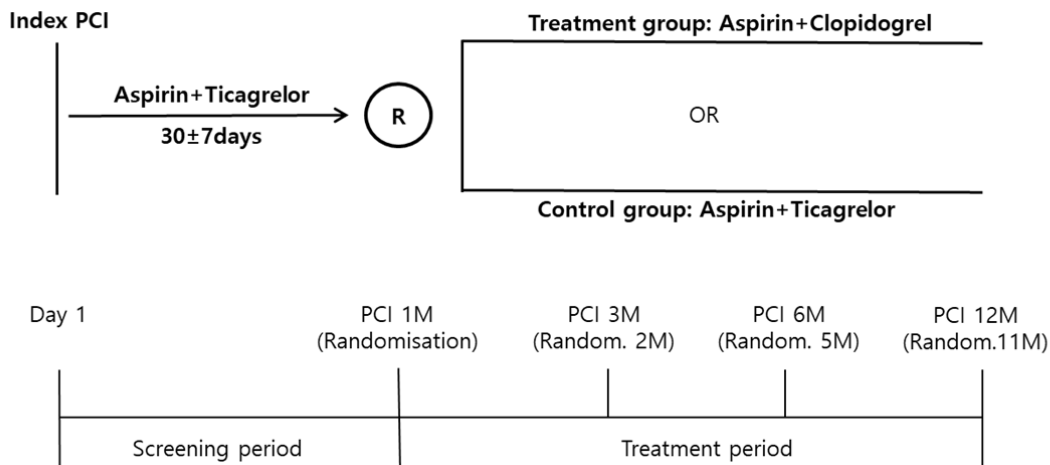

367

368

369 • **Screening period**

370 To conduct screening AMI patients based on the inclusion/exclusion criteria who (1) have been  
 371 treated with ticagrelor + aspirin for at least 30±7 days after an index PCI, (2) received full  
 372 explanation of the study details, (3) given written consent.

373

374 To randomize eligible subjects within 30±7 days after AMI undergoing PCI with newer ge  
 375 neration DES, and receiving aspirin and ticagrelor to the treatment and control groups in  
 376 a 1:1 ratio.

377

378 • **Treatment period**

379 Enrolled patients receive clopidogrel 75mg + aspirin 100 mg (treatment group) or ticagrelor  
 380 90mg bid +aspirin 100mg treatment (control group) for 11 months (post-AMI 1 month to 12  
 381 months) and evaluation safety and efficacy by conducting physical examination, checking vital  
 382 sign, and collecting adverse events at post-PCI 3M, 6M, 12M visits.

383

384 Laboratory and imaging tests, which undergo according to the medical judgment of each  
 385 investigator during the study period, are collected by reviewing medical records or EMR.

386

387 **9.3. Randomization**

388 **9.3.1. Subject Assignment and Randomization**

389 Randomization will be performed to ensure the scientific validity of the clinical test. This will maximize the  
390 comparability of the test and control group and eliminate the subjectivity of the researchers in subject group  
391 assignment. Before PCI, a 250-325mg loading dose of aspirin is given to patients who are naïve to treatment  
392 and all patients receive a loading dose of ticagrelor 180mg. Discharge medication consists of aspirin 100mg  
393 once and ticagrelor 90mg twice per day. All patients receive treatment with aspirin plus ticagrelor for 1 month  
394 after the index PCI (screening period). At  $30 \pm 7$  days after index PCI, eligible patients were randomly  
395 assigned either to the 1) aspirin 100 mg plus clopidogrel 75mg daily (treatment group) or 2) aspirin 100 mg  
396 plus ticagrelor 90mg twice daily (control group) in a 1:1 ratio. Randomization will occur centrally. To  
397 randomize a patient, the investigative site will enter the subject into the designated electronic  
398 system and obtain the treatment assignment (clopidogrel + aspirin or ticagrelor + aspirin) in a 1:1  
399 ratio. At 1 month visit after AMI, eligible subjects were assigned to each treatment group following  
400 an access to the interactive web-based response system (IWRS, Medical Excellence Inc., Seoul,  
401 Korea) by the investigator or designee. Randomization sequence was created by an independent  
402 statistician using SAS 9.3 (SAS Institute Inc. Cary, NC, USA) statistical software and was stratified  
403 by study center and type of AMI (STEMI or NSTEMI) and with a 1:1 allocation using hidden random  
404 block size.

405

### 406 **9.3.2. Management and collection of Randomization**

407 IWRS system is run by a 3rd party and the investigator receives subjects' consent, collects inform  
408 ation required to select the subjects based on the inclusion/exclusion criteria and records test  
409 opinions during the screening phase. Subjects receive the screening number in order at this t  
410 ime. Final selection is conducted after reviewing the suitability of the subject and after that, s  
411 ubjects are assigned and given assignment numbers based on the randomization method. Co  
412 nsequently, subjects are assigned groups with their assignment number, based on the rando  
413 mization table run by a 3<sup>rd</sup> party.

414

### 415 **9.4. Dosage and Method**

- 416 1) Test (Pregrel): 75mg oral administration, once a day
- 417 2) Control (Brilinta): 1 tablet (90mg) oral administration, twice a day

418

### 419 **9.5. Switching protocol (ticagrelor to clopidogrel)**

420 In the control treatment group, when switching from ticagrelor to clopidogrel, patients take a 75mg  
421 clopidogrel without loading dose at the time of the next scheduled dose after the final dose of  
422 ticagrelor (eg,  $\approx 12$  hours from last dose of ticagrelor). The steering committee decided this  
423 switching strategy of no loading dose based on the concept that our study population would be at

424 stable status at the time point of randomization (30 days after index PCI). The data safety and  
425 monitoring board (DSMB) approved this switching strategy on the condition that initial 100 enrolled  
426 patients in the treatment group should be monitored daily during first 7days for the occurrence of  
427 adverse clinical events by telephone interviews. Thereafter, DSMB reviewed the clinical data of the  
428 initial 100 patients in the treatment group and recommended continuation of the study according to  
429 the original protocol. After randomization, patients continue the same medication for 11 months  
430 according to their group allocation (treatment period, Figure 1). Patients are evaluated at 3 (2  
431 months after randomization), 6 (5 months after randomization), and 12 (11months after  
432 randomization) months after index PCI and monitored for the occurrence of the clinical events.

433

### 434 **9.6. Combination Treatment and Cautions**

435 All medication at the time of enrollment and during the trial, other than the investigational drugs,  
436 should be considered as a combination therapy and must be recorded in the case record and  
437 medical record (general name, route of administration, administering start and modification date,  
438 daily dose, etc). Administration of concomitant medications should be minimized during the clinical  
439 trial and changes to concomitant medication should be minimized except for essential drugs. The  
440 administration of drugs other than contraindicated medication is permitted.

441

442 Drugs prohibited during the clinical trial include:

443 1) Anticoagulants: Vitamin K antagonist, Direct thrombin inhibitor, factor X inhibitor, heparin (except  
444 for temporary use in PCI), low molecular-weighted heparin

445 2) Antithrombotic agent: Prasugrel, ticlopidine, beraprost, cilostazol, dipyridamole, Limaprost,  $\alpha$ -  
446 cyclodextrin clathrate, Sarpogrelate, glycoprotein IIb/IIIa inhibitors

447 3) Corticosteroids (except locally use): betamethasone, cortisone, dexamethasone, hydrocortisone,  
448 methylprednisolone, prednisolone, triamcinolone, etc

449 4) Digoxin: Ticagrelor is known to increase the drug concentration of digoxin moderately.

450 5) Drug interaction to CYP450

451 a) Potent inhibitor of CYP3A: Ketoconazole, itraconazole, voriconazole, telithromycin,  
452 clarithromycin [but not erythromycin or azithromycin], nefazodone, ritonavir, saquinavir, nelfinavir,  
453 indinavir, atazanavir, or over 1 liter daily of grapefruit juice may increase the drug concentration of

454 ticagrelor and should not be taken concomitantly.

455 b) CYP3A substrate or derivative: Simvastatin or lovastatin at a dose of 40 mg/day or more with  
 456 ticagrelor is not allowed because it increases the drug concentration and there is a possibility of  
 457 drug side effects of statin itself. There are no restrictions on other statin treatment. A potent inducer  
 458 of CYP3A (eg, rifampin/rifampicin, rifabutin, phenytoin, carbamazepine, phenobarbital) should not  
 459 be taken concomitantly.

460 6) Nonsteroidal anti-inflammatory drugs: diclofenac, ibuprofen, indomethacin, ketoprofen,  
 461 meloxicam, naproxen, celecoxib, etc.

462

## 463 10. Time table, clinical and laboratory measurement

464 All process should follow the below time table. However, if the prescheduled visits are not kept  
 465 under unavoidable circumstances, should record detailed reasons.

466

### 467 10.1. Time table

| Schedule of Measurements           | Screening           | Baseline              | Treatment         |                   |                     |
|------------------------------------|---------------------|-----------------------|-------------------|-------------------|---------------------|
|                                    | V1                  | V2                    | V3                | V4                | V5                  |
|                                    | -30D ~ -1D<br>(PCI) | 1D*<br>(PCI ±30 days) | 2M†<br>(PCI ± 3M) | 5M†<br>(PCI ± 6M) | 11M‡<br>(PCI ± 12M) |
| Informed Consent                   | ●                   |                       |                   |                   |                     |
| Demographics                       | ●                   |                       |                   |                   |                     |
| Physical Examination <sup>1)</sup> | ●                   | ●                     | ●                 | ●                 | ●                   |
| Medical History                    | ●                   |                       |                   |                   |                     |
| Current Medication                 | ●                   |                       |                   |                   |                     |
| Dyspnea Evaluation                 | ●                   | ●                     | ●                 | ●                 | ●                   |
| Subject Suitability Test           | ●                   | ●                     |                   |                   |                     |
| Pregnancy Test <sup>2)</sup>       | ●                   |                       |                   |                   |                     |
| Randomization                      |                     | ●                     |                   |                   |                     |
| Efficacy Test <sup>3)</sup>        |                     | ●                     | ●                 | ●                 | ●                   |
| Exploratory Test <sup>4)</sup>     | ●                   | ●                     | ●                 | ●                 | ●                   |

|                                              |                      |   |   |   |   |   |
|----------------------------------------------|----------------------|---|---|---|---|---|
| Safety Test                                  | Vital Sign           | ● | ● | ● | ● | ● |
|                                              | Physical Examination | ● | ● | ● | ● | ● |
|                                              | Adverse Event Test   |   | ● | ● | ● | ● |
| Investigational Product Prescription         |                      |   | ● | ● | ● |   |
| Investigational Product Adherence Assessment |                      |   |   | ● | ● | ● |
| Concomitant Medication Change Test           |                      |   | ● | ● | ● | ● |

468 \*: Post PCI 30 days ±7 days

469 †: ±14 days permitted from identified date. Call possible if visits are not feasible. Identify in Case Report Form

470 ‡ :- 14 days ~ + 30 days permitted from identified date. Call possible if visits are not feasible. Identify in Case Report Form.

471 1) Measure weight at each visit

472 2) Pregnancy Test: Conduct urine β-HCG test among fertile women who have not identified menopause (no period for 12M or longer)

473 3) Efficacy Test: Stroke, BARC bleeding (type 2,3or 5), Cardiac death, Death from any cause, Death from vascular cause, Acute MI, Stent thrombosis, Ischemia Driven Revascularization

474 4) Exploratory Endpoint: Lab Test, Cardiac Echo, ECG, Genetic Test (Optional)

475 (1) Lab Test

476 ① Blood Test: WBC, Neutrophil, Lymphocytes, Hemoglobin, Platelet, ESR

477 ② Blood Coagulation Test: INR, Fibrinogen

478 ③ Blood Chemical Test: Glucose, Creatinine, AST, ALT, Total bilirubin, Alkaline phosphatase, γ-GTP, Calcium, Phosphorus, LDH, CPK, Uric acid, Total cholesterol, Triglyceride, HDL-cholesterol, LDL-cholesterol, hsCRP

479 ④ Glycosylated hemoglobin

480 ⑤ Platelet Function Test: VerifyNow, PFA-100/200

481 ⑥ Myocardial Damage Index Test

482 ⑦ Thyroid Function Test

483 ⑧ Kidney Function Test: Cockcroft-Gault eCCr, MDRD eGFR

484 • Cockcroft-Gault eCCr(ml/min) = (140-age) \* (Weight in kg) / (72 \* SCr) \* (0.85 for women)

485 • MDRD eGFR(mL/min/1.73m<sup>2</sup>) = 186 \* (SCr)<sup>-1.154</sup> \* (Age)<sup>-0.203</sup> \* 0.742(for women)

486 (2) Cardiac Echo

487 (3) ECG

488 5) Institution conducting genetic tests for analysis should receive subject consent form (Optional).

489

490

## 491 10.2. Clinical and laboratory measurement

### 492 10.2.1. Informed (written) Consent, Demographics & Physical Examination

493 Before enrollment, investigator should explain the objectives and details in-depth and receive  
 494 written consent. After the informed consent is acquired, the investigator should record date of  
 495 consent and demographics such as subject initials, gender and date of birth and also physical  
 496 measurements (height, weight) in the case report form.  
 497  
 498  
 499

500 **10.2.2. Changes in Current & Combined Medication, Medical history**

501 During screening visit, investigator should review subjects' medical records and document past 1-  
502 year medical history. Also, review and record cardiovascular and diabetic medications past 60 days  
503 and at every visit onwards, investigate and record in the case report form if there are any changes  
504 in the recorded medications or there are any additional cardiovascular and diabetic medications.

505

506 **10.2.3. Subject Suitability Test (based on inclusion/exclusion criteria)**

507 Based on the consent, demographics, medical history, combined medication, physical examination  
508 and lab tests, evaluate and record if subjects are eligible using the inclusion/exclusion criteria.

509

510 **10.2.3.1. Pregnancy Test**

511 Pregnancy test should be performed during the screening visit (V1). Fertile women who have not  
512 identified as menopause (no period for 12M or longer) should be negative in urine HCG test. Also,  
513 they should agree to use medically acceptable methods of birth control during clinical test and  
514 follow-up observation period and be given training on these conditions.

515

516 **10.2.3.2. Dyspnea Evaluation**

517 Dyspnea evaluation should be performed during screening (V1) baseline (V2) visits. Should check  
518 the existence, intensity and causes of dyspnea, MMRC and Borg Scale. MMRC (Modified Medical  
519 Research Council Dyspnea Scale) is 0-4, higher in scale indicating greater difficulty of breathing.  
520 Borg Scale is 0-10, which indicates the awareness of fatigue and difficulty of breathing during  
521 exercise. (appendix 2, 3). (13,14) MMRC Dyspnea evaluation should be carried out at every visit.

522

523 **10.2.4. Efficacy variable measurement**

524 1) Primary Endpoint

525 Composite endpoint of MACCE (CV death, MI, or stroke) + BARC bleeding (type 2, 3 or 5) between  
526 1 and 12 months after AMI

527 4) Main Secondary Endpoints

528 ④ BARC bleeding (type 2, 3, or 5) between 1 and 12 months after AMI

529 ⑤ Composite endpoint of MACCE (CV death, MI, or stroke) + BARC bleeding (type 3, 5)  
530 between 1 and 12 months after AMI

531 ⑥ Composite endpoint of MACCE (CV death, MI, or stroke) between 1 and 12 months after  
532 AMI

533 5) Other Secondary Endpoints

534 ⑦ All-cause death between 1 and 12 months after AMI

- 535 ⑧ CV death between 1 and 12 months after AMI
- 536 ⑨ Recurrent MI between 1 and 12 months after AMI
- 537 ⑩ Stroke between 1 and 12 months after AMI
- 538 ⑪ Ischemia Driven Revascularization including PCI or CABG between 1 and 12 months after
- 539 AMI
- 540 ⑫ Stent thrombosis (definite or probable) between 1 and 12 months after AMI

541

542 Check bleeding, Ischemia driven revascularization, Cardiac death, Death from any cause, Death  
 543 from vascular cause, Acute MI, Stroke, Stent thrombosis according to the BARC definition 3M, 6M  
 544 and 12M post PCI and record in the case report form.

545 MACCE is the combined rate of cardiac death, death from vascular cause, Acute MI, Stoke and  
 546 primary efficacy endpoint is the combined bleeding rate based on the MACCE and BARC at 12M.  
 547 This is derived through statistical analysis.

548 7.1.1.

549 Bleeding according to the BARC definition is as follows<sup>(15)</sup>.

550 7.1.2.

551 Table 1 BARC Definition

| BARC Definition |                                                                                                                                                                                                                                                                                                                                                                                                                                                     |
|-----------------|-----------------------------------------------------------------------------------------------------------------------------------------------------------------------------------------------------------------------------------------------------------------------------------------------------------------------------------------------------------------------------------------------------------------------------------------------------|
| Type 0          | No bleeding                                                                                                                                                                                                                                                                                                                                                                                                                                         |
| Type 1          | Bleeding that is not actionable and does not cause the patient to seek unscheduled performance of studies, hospitalization, or treatment by a health care professional; may include episodes leading to self-discontinuation of medical therapy by the patient without consulting a health care professional                                                                                                                                        |
| Type 2          | Any overt, actionable sign of haemorrhage (e.g. more bleeding than would be expected for a clinical circumstance; including bleeding found by imaging alone) that does not fit the criteria for Types 3, 4, or 5, but does meet at least one of the following criteria:<br>(1) requiring non-surgical, medical intervention by a health care professional<br>(2) leading to hospitalization or increased level of care<br>(3) prompting evaluation. |
| Type 3          | Overt bleeding plus hemoglobin drop of 3 to <5*g/dL (provided hemoglobin drop is related to bleed)                                                                                                                                                                                                                                                                                                                                                  |
| Type 3a         | Any transfusion with overt bleeding                                                                                                                                                                                                                                                                                                                                                                                                                 |

|        |         |                                                                                                                                                                                                                                                                                                                                             |
|--------|---------|---------------------------------------------------------------------------------------------------------------------------------------------------------------------------------------------------------------------------------------------------------------------------------------------------------------------------------------------|
|        | Type 3b | Overt bleeding plus hemoglobin drop $\geq 5^*$ g/dL (provided STEMI, NSTEMI drop is related to bleed)<br>Cardiac tamponade<br>Bleeding requiring surgical intervention for control (excluding dental/nasal/skin/hemorrhoid)<br>Bleeding requiring intravenous vasoactive agents                                                             |
|        | Type 3c | Intracranial hemorrhage (does not include microbleeds or hemorrhagic transformation; does include intraspinal)<br>Subcategories; confirmed by autopsy or imaging or LP<br>Intra-ocular bleed compromising vision                                                                                                                            |
| Type 4 |         | Coronary artery bypass graft-related bleeding<br>Perioperative intracranial bleeding within 48 hours<br>Reoperation after closure of sternotomy for the purpose of controlling bleeding<br>Transfusion of $\geq 5$ U whole blood or packed red blood cells within a 48 hour period†<br>Chest tube output $\geq 2$ L within a 24-hour period |
| Type 5 | Type 5a | Probable fatal bleeding: no autopsy or imaging confirmation, but clinically suspicious                                                                                                                                                                                                                                                      |
|        | Type 5b | Definite fatal bleeding: overt bleeding or autopsy or imaging confirmation                                                                                                                                                                                                                                                                  |

552 \*: Corrected for transfusion (1 U packed red blood cells or 1 U whole blood =1 g/dL hemoglobin)

553 † :Cell saver products are not counted.

554 7.1.3.

555 7.1.4.

556 Definite or probable according to the stent thrombosis definition us as follows<sup>(16)</sup>.

557 Table 2 Stent Thrombosis Definition

| Stent thrombosis |                                                                                                                                                                                                                                                                                                                                                                                                                                                                 |
|------------------|-----------------------------------------------------------------------------------------------------------------------------------------------------------------------------------------------------------------------------------------------------------------------------------------------------------------------------------------------------------------------------------------------------------------------------------------------------------------|
| Definite*        | <p>Angiographic confirmation of stent thrombosis†</p> <p>The presence of a thrombus‡ that originates in the stent or in the segment 5 mm proximal or distal to the stent and presence of at least 1 of the following criteria within a 48-hour time window:</p> <p>Acute onset of ischemic symptoms at rest</p> <p>New ischemic ECG changes that suggest acute ischemia Typical rise and fall in cardiac biomarkers (refer to definition of spontaneous MI)</p> |



|                 |                                                                                                                                                                                                                                                                                                                                                                                                                                                                                                                                                                                                                                                                                                                                                                                         |
|-----------------|-----------------------------------------------------------------------------------------------------------------------------------------------------------------------------------------------------------------------------------------------------------------------------------------------------------------------------------------------------------------------------------------------------------------------------------------------------------------------------------------------------------------------------------------------------------------------------------------------------------------------------------------------------------------------------------------------------------------------------------------------------------------------------------------|
|                 | <p><b>Nonocclusive thrombus</b></p> <p>Intracoronary thrombus is defined as a (spheric, ovoid, or irregular) noncalcified filling defect or lucency surrounded by contrast material (on 3 sides or within a coronary stenosis) seen in multiple projections, or persistence of contrast material within the lumen, or a visible embolization of intraluminal material downstream.</p> <p><b>Occlusive thrombus</b></p> <p>TIMI 0 or TIMI 1 intrastent or proximal to a stent up to the most adjacent proximal side branch or main branch (if originates from the side branch).</p> <p><b>Pathological confirmation of stent thrombosis</b></p> <p>Evidence of recent thrombus within the stent determined at autopsy or via examination of tissue retrieved following thrombectomy.</p> |
| <p>Probable</p> | <p>Clinical definition of probable stent thrombosis is considered to have occurred after intracoronary stenting in the following cases:</p> <p>Any unexplained death within the first 30 days§</p> <p>Irrespective of the time after the index procedure, any MI that is related to documented acute ischemia in the territory of the implanted stent without angiographic confirmation of stent thrombosis and in the absence of any other obvious cause</p>                                                                                                                                                                                                                                                                                                                           |

558 \*Definite stent thrombosis is considered to have occurred by either angiographic or pathological confirmation.

559 †The incidental angiographic documentation of stent occlusion in the absence of clinical signs or symptoms is  
 560 not considered a confirmed stent thrombosis (silent occlusion).

561 ‡Intracoronary thrombus.

562 §For studies with ST-elevation MI population, one may consider the exclusion of unexplained death within 30  
 563 days as evidence of probable stent thrombosis.

564 7.1.5.

565 **10.2.5. Safety monitoring**

566 **10.2.5.1. Vital Sign**

567 At every visit, measure vital sign (blood pressure, pulse and respiratory rate measured sitting down  
 568 for 5 min.)

569

570 **10.2.5.2. Physical Examination**

571 Physical examination should be conducted at every visit. Physical examination includes allergies,  
 572 cardiovascular, lung/respiratory, gastrointestinal/liver, biliary, metabolic/endocrine, nephritic/urinary,

573 reproductive, musculoskeletal, skin/connective tissues, neurological, psychic and other physical  
574 organs. Results of clinical importance should be recorded in the comment box of the case report  
575 form. In case there are incidences of medical importance according to the adverse events definition  
576 after the test drug treatment, it should be recorded as adverse events in the case report form.

577

### 578 **10.2.5.3. Adverse Event**

579 The investigator should frequently train subjects to report proactively and check for adverse events  
580 through medical examinations during regular or additional visits. Reports of adverse event should  
581 include date of the adverse event began, date of the adverse event resolved, degree and result of  
582 the adverse event, actions taken related to the test drug, name of drug in question other than the  
583 test drug and treatment and contents of the adverse event. Major cardiovascular adverse events  
584 and bleeding adverse events should be recorded separately in the adverse event page in the case  
585 report form.

586

### 587 **10.2.6. Exploratory Test Items**

#### 588 **10.2.6.1. Lab Test**

589 Based on the investigator's medical judgment, following test results including the medical records  
590 should be recorded in the case report form. Most recent blood test, blood coagulation test, blood  
591 chemical test should be recorded.

592 Myocardial biomarker is collected at PCI admission during screening and if conducted at every visit,  
593 use the most recent result. Also collect thyroid function test if conducted.

594

595 Items of each test is as below.

596

- 597 ① Blood Test: WBC, Neutrophil, Lymphocytes, Hemoglobin, Platelet, ESR  
598 ② Blood Coagulation Test: INR, Fibrinogen  
599 ③ Blood Chemical Test: Glucose, Creatinine, AST, ALT, Total bilirubin, Alkaline phosphatase, γ-  
600 GTP, Calcium, Phosphorus, LDH, CPK, Uric acid, Total cholesterol, Triglyceride, HDL-  
601 cholesterol, LDL-cholesterol, hsCRP  
602 ④ Glycosylated hemoglobin: HbA1c  
603 ⑤ Platelet Function Test: VerifyNow, PFA-100/200  
604 ⑥ Myocardial Damage Index Test: Maximum CK, Maximum CK-MB, Maximum Troponin I,  
605 Maximum Troponin T, NT-proBNP, BNP  
606 ⑦ Thyroid Function Test: T3, free T4, TSH  
607 ⑧ Kidney Function Test: Cockcroft-Gault eCCr, MDRD eGFR

- 608           •   Cockcroft-Gault eCCr(ml/min) = (140-age) \* (Weight in kg) / (72 \* SCr) \* (0.85 for  
609                    women)  
610           •   MDRD eGFR(mL/min/1.73m<sup>2</sup>) = 186 \* (SCr)<sup>-1.154</sup> \* (Age)<sup>-0.203</sup> \* 0.742(for women)

611

612   **10.2.6.2.            Cardiac Echo**

613   Collect below items if ECHO is conducted.

- 614   •   EF (Ejection fraction)  
615   •   LVEDV (Left Ventricle end-diastolic volume)  
616   •   LVESV (Left Ventricle end-systolic volume)  
617   •   LVDd (diastolic left ventricular diameter)  
618   •   LVDs (systolic LV diameter)  
619   •   IVSd (diastolic interventricular septal wall thickness)  
620   •   PWTd (diastolic posterior wall thickness)  
621   •   RWT (Relative Wall Thickness)  
622   •   LVM (Left Ventricular Mass)  
623   •   S' (Systolic velocity of mitral annulus)  
624   •   GLS (Global Left ventricular Strain)  
625   •   E (Peak early diastolic velocity)  
626   •   A (Peak late diastolic velocity)  
627   •   DT (Deceleration time)  
628   •   E' (Early diastolic velocity of mitral annulus)  
629   •   RVSP (Right Ventricular systolic pressure)  
630   •   LA diameter(Left Atrial diameter)  
631   •   LA volume index  
632   •   peak TR regurgitation velocity  
633   •   Tei index(Myocardial Performance Index)

634

635   **10.2.6.3.            ECG**

- 636   •   Basic rhythm  
637   •   Ventricular rate  
638   •   PR interval  
639   •   QRS duration  
640   •   QT  
641   •   QTc  
642   •   QRS axis

643

644 **10.2.6.4. Genetic Test**

645 If a subject agrees to the genetic test, blood sample is collected once during the trial and store for  
646 future genetic analysis associated with pharmacogenetics of clopidogrel or ticagrelor (CYP2C19, CY  
647 P2B6, CYP3A4, CYP3A5, P2RY12, and ABCB1) and exploration related to occurrence of MI using  
648 single-bse extension methods. It should be conducted in the central lab and there could be additional  
649 tests under regulatory or medical perspective. Investigator should follow the lab manual for details of  
650 storage and transportation. Genetic tests is planned to proceed at “Catholic Cardiovascular Research  
651 Institute for Intractable Disease (CRID) of Seoul St. Mary’s Hospital. 6-10mL of sample should be  
652 collected and mixed well in a Becton Dickinson (BD) vacutainer tube. This should be separated and  
653 kept in BD falcon tubes in -80°C freezer. Samples should be transferred from each site to Seoul St.  
654 Mary’s Hospital (Central) every 6 months. Storage period is 5 years from the day of transport and  
655 afterwards, disposed. If the consent is withdrawn after providing the specimen, samples will be  
656 disposed immediately with the request of the subject even before the termination of trial. However,  
657 analysis conducted before the withdrawal will be used in the research and no additional data will be  
658 collected after the withdrawal.

659

660 **10.3. Visit schedule and assessment**

661

662 **10.3.1. 1st Visit (Screening, -30D ~ -1D)**

- 663 1) Subject written consent  
664 2) Demographic/Physical examination  
665 3) Medical history  
666 4) Current medication  
667 5) Dyspnea evaluation  
668 6) Pregnancy test  
669 7) Vital sign  
670 8) Physical examination  
671 9) Subject suitability test  
672 10) Exploratory test (Optional): Lab test, Cardiac Echo, ECG

673

674 **10.3.2. 2nd Visit (Baseline, 1D, PCI 1M)**

- 675 1) Efficacy test: CV death, MI, Stroke, BARC bleeding (type 2, 3, or 5), Cardiac death, Death  
676 from any cause, Death from vascular cause, Acute MI, Stent thrombosis, Ischemia Driven  
677 Revascularization

- 678 2) Vital sign
- 679 3) Physical examination
- 680 4) Adverse event test
- 681 5) Dyspnea evaluation
- 682 6) Investigational drug prescription
- 683 7) Combined medication change
- 684 8) Subject suitability test
- 685 9) Randomize number given
- 686 10) Exploratory test (Optional): Lab test, Cardiac Echo, ECG

687

688 **10.3.3. 3rd Visit (Treatment, 2M, PCI 3M)**

- 689 1) Efficacy test: CV death, MI, Stroke, BARC bleeding (type 2, 3, or 5), Cardiac death, Death
- 690 from any cause, Death from vascular cause, Acute MI, Stent thrombosis, Ischemia Driven
- 691 Revascularization
- 692 2) Vital sign
- 693 3) Physical examination
- 694 4) Adverse event test
- 695 5) Dyspnea evaluation
- 696 6) Investigational drug prescription
- 697 7) Adherence Assessment
- 698 8) Combined medication change
- 699 9) Exploratory test (Optional): Lab test, Cardiac Echo, ECG

700

701 **10.3.4. 4th Visit (Treatment, 5M, PCI 6M)**

- 702 1) Efficacy test: CV death, MI, Stroke, BARC bleeding (type 2, 3, or 5), Cardiac death, Death
- 703 from any cause, Death from vascular cause, Acute MI, Stent thrombosis, Ischemia Driven
- 704 Revascularization
- 705 2) Vital sign
- 706 3) Physical examination
- 707 4) Adverse event test
- 708 5) Dyspnea evaluation
- 709 6) Investigational drug prescription
- 710 7) Adherence Assessment
- 711 8) Combined medication change
- 712 9) Exploratory test (Optional): Lab test, Cardiac Echo, ECG

713

714 **10.3.5. 5th Visit (Treatment, 11M, PCI 12M)**

715 1) Efficacy test: CV death, MI, Stroke, BARC bleeding (type 2, 3, or 5), Cardiac death, Death  
716 from any cause, Death from vascular cause, Acute MI, Stent thrombosis, Ischemia Driven  
717 Revascularization

718 2) Vital sign

719 3) Physical examination

720 4) Adverse event test

721 5) Dyspnea evaluation

722 6) Adherence Assessment

723 7) Combined medication change

724 8) Exploratory test (Optional): Lab test, Cardiac Echo, ECG

725

726

727 **11. Precautions and Expected Side Effects**

728 **11.1. Clopidogrel**

729 1) Warning

730 Patients with genetic CYP2C19 hypofunction: vs. patients with normal CYP2C19 function, systemic  
731 exposure of Clopidogrel's active metabolism is low. This lowers the antiplatelet reactions and  
732 generally, increases the occurrence of cardiovascular events post myocardial infarction. Once  
733 identified as CYP2C19 hypofunction patient, should consider alternative treatment.

734

735 2) Adverse Event

736 Bleeding, hematological disorders (neutropenia/agranulocytosis etc.), gastrointestinal symptoms,  
737 rash and other skin diseases etc.

738

739 **11.2. Ticagrelor**

740 1) Warning

741 This drug can cause significant or at times, fatal bleeding as in other antithrombotic. Patients with  
742 pathologic active bleeding or intracranial hemorrhage should not be given this drug. Patients should  
743 stop taking this drug at least 5~7 days prior to any surgery.

744 Should suspect bleeding if patients show hypotension after taking this drug post coronary  
745 angiography, percutaneous coronary intervention (PCI), coronary artery bypass graft (CABG) or  
746 other surgeries. If possible, treat bleeding without discontinuing medication. If Ticagrelor treatment  
747 is discontinued, risk of cardiovascular event increases.

748

749 2) Adverse Event

750 Bleeding, dyspnea and headache etc.

751

752

## 753 **12. Withdrawal of consent or Loss of follow-up**

754 All enrolled subjects have the right to withdraw their consent or discontinue participation in the study  
755 at any time without penalty or loss of benefits. A withdrawn subject will be treated according to the  
756 standards of medical care and will not be replaced. Subjects have the right to withdraw from the  
757 study at any time without explaining why and without any consequences. When subject  
758 discontinues from the trial, investigators record date of discontinuation, reasons for discontinuation,  
759 post-treatment and clinical course together with all the data collected until then in the case report  
760 form. If a s subject is withdrawn from the study due to problems related to the study drugs,  
761 continued follow-up will be needed for subject safety. Otherwise, no additional data will be collected  
762 after the subject withdraws. Subjects will be included in the analyses up to the time when the  
763 consent was withdrawn unless requesting no use of their medical records for the study analysis.

764

765 Subject lost-to-follow-up should be avoided as much as possible and investigators are urged to do  
766 their utmost best to maintain subject follow-up compliance. Continuous attempts throughout the final  
767 follow-up period should be made to contact the subject. A subject is not considered lost to follow up  
768 until the subject's final follow-up window has closed.

769

## 770 **13. Event adjudication and reporting**

771 All clinical endpoints will require clear, prespecified criteria, and centralized review. These endpoints  
772 will be captured during patient interview, supplemented by death certificates; hospital record  
773 abstracts and related reports (autopsy, biopsy, diagnostic output). All endpoints will be  
774 independently adjudicated by the central event adjudication committee. The Investigator must  
775 complete the Case Report Form for each endpoint event. The information provided must be  
776 sufficient to allow for independent medical assessment of the event. The designee will contact the  
777 Investigator should it be necessary to clarify any information. The Investigator should provide any  
778 additional follow-up information regarding the event to sponsor as soon as it becomes available. All  
779 events should be followed until resolution or stabilization. The study investigators will be responsible  
780 to provide all applicable and available source documentation to the Data Coordinating Center (DCC)  
781 of Seoul St. Mary's Hospital (Seoul, Korea) to allow an independent assessment of these events by  
782 the CEC members. From extensive experience, the following approach is proposed. First, all

783 required documents, reports, hospital records will be identified, made anonymous, and copied to the  
784 DCC by clinical staff. Second, the DCC will check to ensure confidentiality and, if required, have the  
785 records centrally abstracted onto standard forms by trained DCC staff. Third, centrally prepared  
786 forms and documents will be circulated to CEC members for assessment.

787

## 788 **14. Statistical Analysis**

### 789 **14.1. General Principal of Statistical Analysis**

790 Information collected from subjects of the present clinical trial are analyzed in two forms: ITT  
791 (Intention-To-Treatment) and PP (Per-Protocol)

792

#### 793 1) ITT analysis group

794 The ITT population is defined as all randomized patients at 1 month after AMI, regardless of their  
795 adherence with the entry criteria, regardless of treatment they actually received, and regardless of  
796 subsequent withdrawal from treatment or deviation from the protocol<sup>19</sup>. Only some specific reasons  
797 that might cause an exclusion of a patient from the ITT population:

798

- 799 • No treatment was applied at all
- 800 • No data are available after randomization
- 801 •

#### 802 2) PP analysis group

803 The PP population is the subset of ITT population consisting of all patients who receive and retain  
804 the treatment during 12 months after PCI<sup>19</sup>. Some specific reasons that might cause an exclusion of  
805 a patient from the PP population:

806

- 807 ● Violation of entry criteria including inclusion and exclusion criteria
- 808 ● Withdrawal of consent
- 809 ● Concomitant treatment of oral anticoagulant agent (vitamin-K antagonists or novel oral  
810 anticoagulants such as dabigatran, rivaroxaban, apixaban, or edoxaban) during the study  
811 period
- 812 ● Poor compliance
  - 813 - Conversion from ticagrelor + aspirin to clopidogrel + aspirin during RCT procedure and  
814 vice versa
  - 815 - Discontinuation of test or control drugs for 7 days or longer

816 \* In the cases of withdrawal of consent, concomitant treatment of oral anticoagulation agent and  
817 poor compliance, their data will be used for statistical analyses until such events occur.



818

819

820 3) Missing data handling

821 • Missing variables will not be imputed for planned analyses, except where otherwise  
822 specified.

823 • The primary endpoint will be based on Kaplan-Meier estimates, which automatically  
824 account for censored data.

825 • For sensitivity, purposes, missing data was imputed the most recent data (Last  
826 Observation Carried Forward method).

827

## 828 **14.2. Evaluation Standard**

### 829 **14.2.1. Efficacy Test Variable**

830 1) Primary Endpoint

831 Composite endpoint of MACCE (CV death, MI, or stroke) + BARC bleeding (type 2, 3 or 5)  
832 between 1 and 12 months after AMI

833 2) Main Secondary Endpoints

834 ① BARC bleeding (type 2, 3, or 5) between 1 and 12 months after AMI

835 ② Composite endpoint of MACCE (CV death, MI, or stroke) + BARC bleeding (type 3, 5)  
836 between 1 and 12 months after AMI

837 ③ Composite endpoint of MACCE (CV death, MI, or stroke) between 1 and 12 months after  
838 AMI

839 3) Other Secondary Endpoints

840 ① All-cause death between 1 and 12 months after AMI

841 ② CV death between 1 and 12 months after AMI

842 ③ Recurrent MI between 1 and 12 months after AMI

843 ④ Stroke between 1 and 12 months after AMI

844 ⑤ Ischemia Driven Revascularization including PCI or CABG between 1 and 12 months after  
845 AMI

846 ⑥ Stent thrombosis (definite or probable) between 1 and 12 months after AMI

847

### 848 **14.2.2. Exploratory Test Variable**

849 Lab test, cardiac echo, ECG, genetic test

850

851 **14.2.3. Safety Test Variable**

852 Adverse event, vital sign, physical examination

853

854 **14.3. Evaluation Method**855 **14.3.1 Primary Endpoint Analysis**

- 856 • The non-inferiority test between 1 and 12 months after AMI will be based on the Kaplan-Meier  
857 estimates. A 95% two-sided confidence interval will be computed for the difference event rate  
858 (clopidogrel + aspirin) – event rate (ticagrelor + aspirin). The clopidogrel group will be judged as  
859 non-inferior to the ticagrelor if the upper confidence limit is less than the predetermined non-  
860 inferiority margin of 3% (absolute risk difference).
- 861 • The hypothesis of non-inferiority test will be based on the difference of proportions. Let  $r_T$   
862 denote the true event proportion in the test arm (clopidogrel + aspirin) between 1 and 12  
863 months, and  $r_C$  denote the true event proportion in the control arm (ticagrelor + aspirin) between  
864 1 and 12 months. The hypotheses are

865 
$$H_0: r_T - r_C \geq \Delta$$

866 
$$H_A: r_T - r_C < \Delta$$

867 The  $\Delta$  is the non-inferiority margin, and is taken to be 0.03. The test will be performed as a one-  
868 sided test at  $\alpha=0.05$ .

869 The null hypothesis shall be rejected at  $\alpha=0.05$  if the one-sided p-value is less than 0.05.  
870 When this occurs, the upper limit of the two-sided 95% confidence interval will be less than 3%.

- 871 • If the non-inferiority analysis passed the acceptance criterion, a superiority analysis will be  
872 performed. Statistical superiority is achieved when the upper limit of the two-sided 95%  
873 confidence interval of the risk difference is less than 0%. The type I error for this analysis is  
874 protected by the non-inferiority analysis, and no alpha adjustment would be appropriate
- 875 • Subgroup analyses will be performed by the primary endpoint categorized by type of AMI  
876 (STEMI vs NSTEMI), Subgroup analyses will be performed by the primary endpoint categorized  
877 by Type of AMI (STEMI vs NSTEMI), Gender, Age ( $\geq 75$  vs  $< 75$ ), Diabetes, LVEF ( $\geq 40\%$  vs  $< 40\%$ ),  
878 eGFR ( $\geq 60$  vs  $< 60$ ), type of implanted stents (Xience vs Resolute vs Synergy stents), Bleeding  
879 risk according to the ARC criteria (high vs low bleeding risk), CYP2C19 loss-of-function carrier  
880 status (carrier vs non-carrier).
- 881 • The primary analysis population for primary and secondary endpoints will be the Intention-to-  
882 Treat (ITT) population. The primary endpoint analysis will also be performed on the Per Protocol  
883 (PP) population as subsequent analysis.

- 884 • A primary endpoint analysis stratified by the institutions as a sensitivity analysis. Strata will be  
885 divided by the accrual number of institution based on quartiles.

886

#### 887 **14.3.2 Main Secondary Endpoint Analysis**

- 888 • The secondary endpoints will be composed of two families. The first family consists of the  
889 composite endpoint of MACCE (CV death, MI, stroke) plus BARC bleeding (type 2, 3, or 5). The  
890 second family will consist of MACCE plus BARC bleeding (type 3, or 5), MACCE, and BARC  
891 bleeding (type 2, 3, or 5). The endpoints from the second family will be tested hierarchically,  
892 thereby maintaining the study-wise alpha level. These secondary endpoints will only be tested if  
893 both the primary composite endpoint and BARC bleeding are significant at non-inferiority  
894 analysis, and superiority analysis. Composite endpoint of MACCE plus BARC bleeding (type 3,  
895 or 5) will be tested first, and only if this is significant, the composite endpoint of MACCE only will  
896 be tested afterwards. BARC bleeding (type 2, 3, or 5) will be tested only if both of the above  
897 endpoints are tested significant.

898

#### 899 **14.3.3 Exploratory Test Variable Analysis**

900 For continuous data, present technical statistics (mean, standard deviation, median, min. and  
901 max. value) on the changes between base & each visits. Based on whether the data follow  
902 normal distribution, comparatively verify between the two groups using the independent t-test or  
903 Wilcoxon's rank sum test. Also, for comparison within each group, analyze using the paired  
904 t-test or Wilcoxon's signed rank test. For categorical data, present technical statistics (fre  
905 quency, percentage) and comparatively verify between groups using the chi-square test or  
906 Fisher's exact test.

907

#### 908 **14.3.4 Additional Analysis**

909 Additional analysis should be run including all occurred events if the drug is given continuously.

910

#### 911 **14.3.5 Safety Test Variable Analysis**

##### 912 **14.3.5.1 Adverse event**

913 Analysis should be conducted for all adverse events occurred during the trial. Summarize  
914 adverse event occurrence rate, occurrence rate of specific adverse event causing the follow-up  
915 loss and occurrence rate of critical adverse event. Adverse event occurrence rate includes all  
916 adverse event occurrence rate and occurrence rate of adverse event related to the test drug.

917

##### 918 **14.3.5.2 Vital sign, physical examination**

919 For continuous data, present technical statistics (mean, standard deviation, median, min. and  
920 max. value) on the changes between base & each visits. Based on whether the data follow  
921 normal distribution, comparatively verify between the two groups using the independent t-test or

922 Wilcoxon's rank sum test. Also, for comparison within each group, analyze using the paired t-test  
923 or Wilcoxon's signed rank test. For categorical data, present technical statistics (frequency,  
924 percentage) and comparatively verify between groups using the chi-square test or Fisher's  
925 exact test.

926

927

## 928 **15 Safety (including side-effects) Evaluation Standard, Method and** 929 **Reporting**

### 930 **15.1 Safety Related Definitions**

#### 931 **15.1.1 Adverse Event (AE)**

932 Adverse event is undesired and unintended signs, symptoms and diseases occurred in subjects  
933 given the test drug and does not necessarily require a direct correlation to the test drug. Therefore,  
934 it includes undesired and unintended signs (i.e. over the clinically meaningful pathological results),  
935 symptoms or diseases during the trial regardless of whether the adverse even is related to the test  
936 drug or not.

937

#### 938 **15.1.2 Adverse Drug Reaction (ADR)**

939 Adverse drug reaction is all undesired and unintended reactions caused by any dose of the test  
940 drug and cannot disregard the correlation to the test drug.

941

#### 942 **15.1.3 Serious adverse Event (SAE)**

943 Serious adverse event/adverse drug reaction indicates the below cases.

944 1) Expired or high risk of death

945 2) In need of hospitalization or extended hospitalization. Excluding below.

946 • not related to the indication of the trial and has not deteriorated after test drug use a  
947 nd on standby or prescheduled treatment for existing symptoms

948 • emergency room treatment not applying to the definition of serious adverse event and  
949 not causing hospitalization

950 •hospitalization for the purpose of societal issues or respite care without degeneration of over  
951 all conditions

952 3) Causing permanent disability or hypofunction

953 4) Fetal malformation or abnormality

954 5) For meaningful cases requiring medical or surgical intervention to prevent subjects from being  
955 endangered or prevent the listed results from occurring

956

957 **15.2 Safety Evaluation Method**

958 **15.2.1 Intensity of the Adverse Event**

959 Investigator evaluates the intensity of the adverse event or serious adverse event occurred during  
960 the test period. This evaluation should be based on the investigator's clinical judgment.

961 Intensity of the adverse events and serious adverse events recorded in the case report form should  
962 refer to the WHO guideline and adverse events not presented should follow the below standard.

963

964 1) Grade1 (mild symptom)

965 Adverse events causing temporary or mild inconvenience and does not require treatment.

966 Normal life (function) of subject is not much hindered and activity not limited.

967 2) Grade2 (moderate)

968 Adverse events from mild to moderate limits on activity. Normal life (function) is considerably

969 hindered, requiring others' help. Treatment may be needed and once recovering from

970 treatment, treatment may not be needed.

971 3) Grade3 (severe)

972 Adverse events with severe limitations on activities, mostly requiring others' assistance. If

973 medical treatment is needed, may require hospitalization.

974

975 **15.2.2 Correlation of Adverse Event**

976 Correlation of adverse event or serious adverse event to the test drug should be based on the  
977 below guideline.

978

979 1) Certain

980 Correlation to test drug application/usage is valid and cannot be explained by other drugs,

981 chemicals or current diseases. When discontinuing the test drug, show clinically reasonable

982 reactions. If re-administered, definite pharmaceutically and phenomenologically

983 2) Probable/likely

984 Correlation to test drug application/usage is proper and cannot be explained by other drugs,

985 chemicals or current diseases. When discontinuing the test drug, show clinically reasonable

986 reactions (no information on re-administration)

987 3) Possible

988 Although correlation to test drug application/usage is proper, it can also be explained by

989 other drugs, chemicals or current diseases. If information on discontinuation of the test drug

990 is insufficient or unclear

991 4) Unlikely

992 If case is temporary and lacking correlation to test drug application/usage. It can also be  
993 explained by other drugs, chemicals or potential diseases.

994 5) Conditional/unclassified

995 Require more information for review for proper evaluation.

996 6) Inaccessible/unclassifiable

997 When information is insufficient and contradictory to evaluate and cannot supplement or  
998 confirm

999

### 1000 **15.3 Reporting of Adverse Event and Serious adverse Event**

1001 Investigator should record all information related to adverse events and serious adverse events  
1002 such as name of adverse event, date of occurrence, end date, continuation at the time of the final  
1003 evaluation, intensity, correlation to the study drug, results and treatment in the case report form.

1004

### 1005 **15.4 Safety Reporting**

1006 If serious adverse event occurs during the clinical trial, it should be reported regardless of its  
1007 correlation to the test drug.

1008

1009 1) Investigator

1010 Investigator should report all serious adverse events to the IRB immediately and should hand in a  
1011 follow-up report with the details. In the report, the investigator should use the subject's identification  
1012 number instead of the name, social security number and address to protect the subject's personal  
1013 information.

1014

1015 2) Research Coordinator

1016 Research coordinator should report to the investigator immediately when a serious adverse event  
1017 occurs. Should also follow-up with a detailed report.

1018

1019 3) IRB

1020 IRB should advise the investigator to take necessary actions if unexpected serious adverse drug  
1021 reactions or new information come up which could negatively impact the subject's safety and the  
1022 clinical trial.

1023

1024 4) Serious Adverse Event Reporting

1025 Investigator should report all serious adverse events to the IRB immediately. If it causes death or  
1026 presents risk of death, the investigator should report within 7 days of acknowledgement and also

1027 hand in a follow-up report within 8 days of its first reporting. For all other serious and unexpected  
1028 adverse drug reaction, the investigator should report to the IRB within 15 days of acknowledgement.  
1029 Should perform follow-up research if the subject does not recover from the given serious adverse  
1030 event after the termination of clinical test.

1031 While all serious adverse events should be reported until the end of the trial, serious adverse events  
1032 occurring within 30 days from test termination, should report only those the investigator considers to  
1033 be correlated to the test.

1034

1035 5) Major Adverse Cardiac and Cerebrovascular Events [MACCE] & Bleeding Reporting  
1036 Principal investigator or research coordinator in each institution should input in the eCRF within  
1037 15 days of acknowledgement once a Major adverse cardiac and cerebrovascular event  
1038 [MACCE] & bleeding occur.

1039 Coordinator in Seoul St. Mary's Hospital should collect the MACCE & Bleeding Event regularly  
1040 from the eCRF and for unclear variables, should report to the CEAC (Clinical Event  
1041 Adjudication Committee) members to receive feedback. Feedback should be reported back to  
1042 the investigator and coordinators in each institution.

1043

## 1044 **16 Informed Consent**

1045 Investigator and research coordinator should provide a copy of the informed consent form or any  
1046 other documents shared with the subject to the subject or representative. If there are any changes  
1047 to the consent form or shared documents during the clinical trial, the investigator or coordinator  
1048 should provide a copy of the revised form or document to the subject or his/her representative.

1049

## 1050 **17 Follow-up Treatment of Subjects after Clinical Trial**

1051 Test drugs, ticagrelor and clopidogrel are standard treatment drugs for patients with acute  
1052 myocardial infraction based on myocardial infraction treatment standards of the American Heart  
1053 Association and the European Heart Association. In Korea, the Health Insurance Corporation  
1054 approves taking once of the two drugs for acute myocardial infraction. This research treats one of  
1055 the two drugs once patients are in their stable period post 1M of myocardial infraction. Although this  
1056 research is randomized, since there is no superiority proven for one of the drugs, patients are  
1057 expected to certainly, and randomly choose one of drug bearing the side-effects. This research does  
1058 not apply to the victim compensation agreement.

1059 Investigator should guide no-response or lost to follow-up subjects to get appropriate treatment and  
1060 for subjects who finished the test, but experienced low efficacy of treatment, switch to other  
1061 treatment.

1062 If serious adverse event due to the test drug occurs or the disease deteriorate during or after the  
1063 clinical trial, should receive consultation or treatment anytime and will provide appropriate measures  
1064 in the emergency room or clinic.

1065

## 1066 **18 Subject Safety and Protective Measures**

### 1067 **18.1 Subject Safety and Protective Measures**

1068 Switching from Brilinta to Pregrel has no fixed guideline, but is a possible treatment based on  
1069 the investigator.

1070 According to the guideline of the American Heart Association, acute myocardial infarction patie  
1071 nts must take one of the three P2Y12 inhibitors (Clopidogrel 75 mg daily, Prasugrel 10 mg da  
1072 ily, Ticagrelor 90 mg twice daily) after drug emission stent implantation for 1 year, but there is  
1073 no guideline as to which drug to take as a priority.<sup>(11)</sup>

1074 According to the research switching to clopidogrel from prasugrel among acute coronary syndrome  
1075 patients, the effect of platelet inhibition is significantly higher in Brilinta vs. Pregrel<sup>(10)</sup>.

1076 However, Pregrel has been used worldwide prior to the introduction of Brilinta and is currently  
1077 being used. Pregrel has no limitations of use as it has lower antiplatelet inhibition rate vs.  
1078 Brilinta, but has sufficient level of platelet inhibition to show effects of treatment.

1079 On the contrary, as the risk of bleeding can be higher for Brilinta with its strong antiplatelet i  
1080 nhibition, this research aims to evaluate the efficacy and safety of the two drugs.

1081 Test drugs are already in-market and the investigator should be fully familiar with the indicated side-  
1082 effects and precautions in the protocol. In case there are any serious adverse events during the test,  
1083 the investigator should terminate the clinical trial for the subject, take appropriate measures and  
1084 immediately inform the IRB.

1085

### 1086 **18.2 Confidentiality**

1087 All personal information will be kept confidential under relevant laws and regulations and will not be  
1088 disclosed to the public. Subject name will not be disclosed to the sponsor and will be indicated only  
1089 as subject number and initials in the case report form. If diagnostics test result documents has  
1090 subject's name, it should be deleted before the copy is shared with the subject. Data recorded in the  
1091 computer should be kept under the local data protection act. Should notify subject with written  
1092 document that subject's medical records may be under due diligence by the staff of the sponsor,  
1093 IRB or relevant government officials to verify the accuracy. Also, written notification must be given  
1094 that personal information required for the due diligence will be kept in strict confidentiality under the  
1095 data protection act. Even after the results are published, information that can be used to identify the  
1096 subject will be kept confidential.



1097

1098

## 1099 **19 Requirements for Scientific Clinical trial**

### 1100 **19.1 Protocol Deviation**

1101 Changes that could impact how and what we can get from the clinical trial, including changes in the  
1102 objective, study design, subject group, sample size estimation and process or changes that can  
1103 impact the safety of the subject require official change of protocol. These types of deviations must  
1104 be approved by the IRB prior to the change.

1105

### 1106 **19.2 Record Retention**

1107 Investigator should transfer the documents and information to the person in charge of record  
1108 keeping in the clinical trial institution for 3 years after the closing of the test, unless otherwise  
1109 specified in other legislations. However, this period can be extended once the head of the Ministry  
1110 of Food and Drug Safety orders or the sponsor decides necessary. The clinical trial institution  
1111 should implement back-up plans so that the information is not damaged or missing before the given  
1112 date.

1113

### 1114 **19.3 Clinical Trial Institution Monitoring**

1115 Sponsor or the authorized Clinical Research Organization (CRO) should guarantee that the subjects'  
1116 human rights, safety and welfare are protected, the test is being conducted appropriately based on  
1117 the current protocol and GCP, the reported test information are accurate and complete and the  
1118 relevant documents can be verified. Sponsor has the responsibility to appoint a test monitor for  
1119 proper monitoring and the monitoring should be conducted based on the monitoring protocol.

1120

### 1121 **19.4 Investigator Responsibility**

#### 1122 1) Clinical trial Record and Documents

1123 Investigator should ensure all test related communications, subject records, consent forms, test  
1124 drug usage records, copy of the case report form are retained. These documents should also be  
1125 ensured not to be damaged or missing during the record keeping period. However, after the study  
1126 report is finalized and published (once fact-finding research is completed if required by the head of  
1127 the Ministry of Food and Drug Safety, documents should be transferred to those in charge of record  
1128 retention.

1129

#### 1130 2) Protocol Deviation

1131 For major process/protocol changes during the clinical trial -excluding the minor administrative ones

1132 or those not impacting subject's safety- the investigator must receive pre-approval from the IRB.

1133

### 1134 3) Record Disclosure

1135 Individual medical information obtained from the test is considered confidential and should not be  
1136 disclosed to any 3<sup>rd</sup> party other than those with rights to the related information. However, it may be  
1137 shared with the subject's attending physician or other medical personnel with the responsibility of  
1138 the subject's welfare. Also, information obtained from this test may be disclosed to the IRB and the  
1139 Ministry of Food and Drug Safety for due diligence.

1140

## 1141 **20 Study organization**

1142

### 1143 **20.1 Steering Committee**

1144 The Steering Committee, composed of the chairperson (CI) and the principal investigators of the  
1145 main participating centers, will approve the trial design, protocol and amendments issued to the  
1146 Data and Safety Monitoring Board (DSMB) and the clinical sites. This committee will also be  
1147 responsible for reviewing the final results, determining the methods of presentation and publication,  
1148 and selection of secondary projects and publications

1149

### 1150 **20.2 Data Safety Monitoring Board (DSMB)**

1151 An independent DSMB will monitor the study data on a periodic basis to evaluate interim results  
1152 during the trial and determine reporting and stopping rules as specified in the DSMB charter and  
1153 data monitoring plan. The data to be reviewed will consist of adjudicated and non-adjudicated major  
1154 adverse cardiovascular events, bleeding, and other serious adverse events and their incidence in  
1155 order to identify potential safety issues. Based on the safety data, the DSMB may recommend  
1156 modifications to the protocol, suspension or termination of the trial, and advise the Executive  
1157 Committee. All final decisions regarding trial modifications rest with the Steering Committee. The  
1158 DSMB committee will review the safety data from this study and make recommendations based on  
1159 safety analyses, protocol deviation, and follow-up case reports. Scheduled DSMB meetings will  
1160 discuss safety or compliance issues and will provide advice on modifying or stopping the study as  
1161 needed. Additionally, the DSMB may call a meeting at any time if there is reason to suspect that  
1162 safety is an issue. Members will not be among those who directly control the sponsor of this study.  
1163 Members will not have any affiliation with the core laboratories, or be an Investigator of the trial. The  
1164 composition of the DSMB will include at least two clinicians with expertise in interventional  
1165 cardiology and one statistician with expertise in medical statistics and clinical trial. The DSMB will

1166 function in accordance with applicable regulatory guidelines. The DSMB chairperson will notify data  
1167 coordinating center (DCC) of any safety or compliance issues. The DSMB will help to conduct the  
1168 trial appropriately by reviewing and reporting the cumulative investigational data for accuracy and  
1169 completeness, ensuring protocol compliance. The DSMB will develop a consensus understanding of  
1170 all trial endpoints and definitions used in the event adjudication process.

1171

### 1172 **20.3 Clinical Events Adjudication Committee**

1173 The Clinical Events Adjudication Committee (CEAC) is made up of interventional cardiologists who  
1174 are not participants in the study. The CEC is charged with the development of specific criteria used  
1175 for the categorization of clinical events in the study which are based on the protocol. At the onset of  
1176 the trial, the Clinical Events Committee will establish explicit rules outlining the minimum amount of  
1177 data required, and the algorithm followed in order to classify a clinical event. All members of the  
1178 CEAC will be blinded to the primary results of the trial. The CEAC will meet regularly to review and  
1179 adjudicate all clinical events in which the required minimum data is available. The Committee will  
1180 also review and rule on all clinical events that occur throughout the trial.

1181

### 1182 **20.4 Data Coordination**

1183 Data coordination will be performed by the Clinical Research Center in Seoul St. Mary's Hospital.

1184

1185

## 1186 **21 References**

- 1187 1. Valgimigli M, Bueno H, Byrne RA, Collet JP, Costa F, Jeppsson A, Jüni P, Kastrati A, Kolh  
1188 P, Mauri L, Montalescot G, Neumann FJ, Petricevic M, Roffi M, Steg PG, Windecker S, Z  
1189 amorano JL, Levine GN; 2017 ESC focused update on dual antiplatelet therapy in coronary  
1190 artery disease developed in collaboration with EACTS: The Task Force for dual antiplatelet  
1191 therapy in coronary artery disease of the European Society of Cardiology (ESC) and of th  
1192 e European Association for Cardio-Thoracic Surgery (EACTS). Eur Heart J. 2018;39(3):213-  
1193 60.
- 1194 2. Wallentin L, Becker RC, Budaj A, Cannon CP, Emanuelsson H, Held C, Horrow J, Husted  
1195 S, James S, Katus H, Mahaffey KW, Scirica BM, Skene A, Steg PG, Storey RF, Harrington  
1196 n RA; PLATO Investigators, Freij A, Thorsén M. Ticagrelor versus clopidogrel in patients wit  
1197 h acute coronary syndromes. N Engl J Med. 2009;361(11):1045-57.
- 1198 3. Wiviott SD, Braunwald E, McCabe CH, Montalescot G, Ruzyllo W, Gottlieb S, Neumann FJ  
1199 , Ardissino D, De Servi S, Murphy SA, Riesmeyer J, Weerakkody G, Gibson CM, Antman  
1200 EM; TRITON-TIMI 38 Investigators. Prasugrel versus clopidogrel in patients with acute coro

- 1201 nary syndromes. *N Engl J Med.* 2007;357(20):2001-15.
- 1202 4. Sibbing D, Aradi D, Jacobshagen C, Gross L, Trenk D, Geisler T, Orban M, Gori T, Hada  
1203 mitzky M, Merkely B, Kiss RG, Komócsi A, Dézsi CA, Thalmeier A, Löw A, Holdt L, Teups  
1204 er D, Ince H, Felix SB, Parma R, Malek L, Horstkotte J, Baylacher M, Schwinger R, Riebe  
1205 r J, Mudra H, Hausleiter J, Huber K, Neumann FJ, Koltowski L, Huczek Z, Mehilli J, Mass  
1206 berg S; TROPICAL-ACS Investigators. A randomised trial on platelet function-guided de-esc  
1207 alation of antiplatelet treatment in ACS patients undergoing PCI. Rationale and design of th  
1208 e Testing Responsiveness to Platelet Inhibition on Chronic Antiplatelet Treatment for Acute  
1209 Coronary Syndromes (TROPICAL-ACS) Trial. *Thromb Haemost.* 2017;117(1):188-95.
- 1210 5. Velders MA, Abtan J, Angiolillo DJ, Ardissino D, Harrington RA, Hellkamp A, Himmelmann  
1211 A, Husted S, Katus HA, Meier B, Schulte PJ, Storey RF, Wallentin L, Gabriel Steg P, Jam  
1212 es SK; PLATO Investigators. Safety and efficacy of ticagrelor and clopidogrel in primary per  
1213 cutaneous coronary intervention. *Heart.* 2016;102(8):617-25.
- 1214 6. Morrow DA, Wiviott SD, White HD, Nicolau JC, Bramucci E, Murphy SA, Bonaca MP, Ruff  
1215 CT, Scirica BM, McCabe CH, Antman EM, Braunwald E. Effect of the novel thienopyridine  
1216 prasugrel compared with clopidogrel on spontaneous and procedural myocardial infarction i  
1217 n the Trial to Assess Improvement in Therapeutic Outcomes by Optimizing Platelet Inhibitio  
1218 n with Prasugrel-Thrombolysis in Myocardial Infarction 38: an application of the classification  
1219 system from the universal definition of myocardial infarction. *Circulation.* 2009;119(21):2758-  
1220 64.
- 1221 7. Becker RC, Bassand JP, Budaj A, Wojdyla DM, James SK, Cornel JH, French J, Held C,  
1222 Horrow J, Husted S, Lopez-Sendon J, Lassila R, Mahaffey KW, Storey RF, Harrington RA,  
1223 Wallentin L. Bleeding complications with the P2Y12 receptor antagonists clopidogrel and tic  
1224 agrelor in the PLATElet inhibition and patient Outcomes (PLATO) trial. *Eur Heart J.* 2011;32(  
1225 23):2933-44.
- 1226 8. Antman EM, Wiviott SD, Murphy SA, Voitek J, Hasin Y, Widimsky P, Chandna H, Macias W  
1227 , McCabe CH, Braunwald E. Early and late benefits of prasugrel in patients with acute cor  
1228 onary syndromes undergoing percutaneous coronary intervention: a TRITON-TIMI 38 (TRial  
1229 to Assess Improvement in Therapeutic Outcomes by Optimizing Platelet InhibitioN with Pras  
1230 ugrel-Thrombolysis In Myocardial Infarction) analysis. *J Am Coll Cardiol.* 2008;51(21):2028-3  
1231 3.
- 1232 9. De Luca L, D'Ascenzo F, Musumeci G, Saia F, Parodi G, Varbella F, Marchese A, De Ser  
1233 vi S, Berti S, Bolognese L. Incidence and outcome of switching of oral platelet P2Y12 rece  
1234 ptor inhibitors in patients with acute coronary syndromes undergoing percutaneous coronary  
1235 intervention: the SCOPE registry. *EuroIntervention.* 2017;13(4):459-66.

- 1236 10. Zettler ME, Peterson ED, McCoy LA, Effron MB, Anstrom KJ, Henry TD, Baker BA, Mess  
1237 enger JC, Cohen DJ, Wang TY; TRANSLATE-ACS Investigators. Switching of adenosine di  
1238 phosphate receptor inhibitor after hospital discharge among myocardial infarction patients: In  
1239 sights from the Treatment with Adenosine Diphosphate Receptor Inhibitors: Longitudinal Ass  
1240 essment of Treatment Patterns and Events after Acute Coronary Syndrome (TRANSLATE-A  
1241 CS) observational study. *Am Heart J.* 2017;183:62-8.
- 1242 11. Alexopoulos D, Xanthopoulou I, Deffereos S, Sitafidis G, Kanakakis I, Hamilos M, Angelidi  
1243 s C, Petousis S, Stakos D, Parissis H, Vavouranakis M, Davlouros P, Goudevenos J, Stefa  
1244 nadis C. In-hospital switching of oral P2Y12 inhibitor treatment in patients with acute coron  
1245 ary syndrome undergoing percutaneous coronary intervention: prevalence, predictors and sh  
1246 ort-term outcome. *Am Heart J.* 2014;167(1):68-76 e2.
- 1247 12. Bagai A, Peterson ED, Honeycutt E, Effron MB, Cohen DJ, Goodman SG, Anstrom KJ,  
1248 Gupta A, Messenger JC, Wang TY. In-hospital switching between adenosine diphosphate re  
1249 ceptor inhibitors in patients with acute myocardial infarction treated with percutaneous coron  
1250 ary intervention: Insights into contemporary practice from the TRANSLATE-ACS study. *Eur*  
1251 *Heart J Acute Cardiovasc Care.* 2015;4(6):499-508.
- 1252 13. Cuisset T, Deharo P, Quilici J, Johnson TW, Deffarges S, Bassez C, Bonnet G, Fourcade  
1253 L, Mouret JP, Lambert M, Verdier V, Morange PE, Alessi MC, Bonnet JL. Benefit of switc  
1254 hing dual antiplatelet therapy after acute coronary syndrome: the TOPIC (timing of platelet i  
1255 nhibition after acute coronary syndrome) randomized study. *Eur Heart J.* 2017;38(41):3070-8  
1256 .
- 1257 14. Sibbing D, Aradi D, Jacobshagen C, Gross L, Trenk D, Geisler T, Orban M, Hadamitzky  
1258 M, Merkely B, Kiss RG, Komócsi A, Dézsi CA, Holdt L, Felix SB, Parma R, Klopotoski M  
1259 , Schwinger RHG, Rieber J, Huber K, Neumann FJ, Koltowski L, Mehilli J, Huczek Z, Mas  
1260 sberg S; TROPICAL-ACS Investigators. Guided de-escalation of antiplatelet treatment in pati  
1261 ents with acute coronary syndrome undergoing percutaneous coronary intervention (TROPIC  
1262 AL-ACS): a randomised, open-label, multicentre trial. *Lancet.* 2017;390 (10104) :1747-57.
- 1263 15. Angiolillo DJ, Rollini F, Storey RF, Bhatt DL, James S, Schneider DJ, Sibbing D, So DYF,  
1264 Trenk D, Alexopoulos D, Gurbel PA, Hochholzer W, De Luca L, Bonello L, Aradi D, Cuiss  
1265 et T, Tantry US, Wang TY, Valgimigli M, Waksman R, Mehran R, Montalescot G, Franchi F,  
1266 Price MJ. International Expert Consensus on Switching Platelet P2Y12 Receptor-Inhibiting  
1267 Therapies. *Circulation.* 2017;136(20):1955-75.
- 1268 16. Angiolillo DJ. Dual antiplatelet therapy guided by platelet function testing. *Lancet.* 2017;39  
1269 0(10104):1718-20.
- 1270 17. Franchi F, Angiolillo DJ. Novel antiplatelet agents in acute coronary syndrome. *Nat Rev C*

- 1271 ardiol. 2015;12(1):30-47.
- 1272 18. ESC Committee for Practice Guidelines (CPG), Jeroen J. Bax (CPG Chairperson) (The  
1273 Netherlands), Helmut Baumgartner (Germany), Claudio Ceconi (Italy), Veronica Dean (France),  
1274 Christi Deaton (UK), et al. Third Universal Definition of Myocardial Infarction. J Am Coll Cardiol.  
1275 2012 Oct 16;60(16):1581–98.
- 1276 19. Gwon HC, Hahn JY, Park KW, Song YB, Chae IH, Lim DS, Han KR, Choi JH, Choi SH, Kang  
1277 HJ, Koo BK, Ahn T, Yoon JH, Jeong MH, Hong TJ, Chung WY, Choi YJ, Hur SH, Kwon HM,  
1278 Jeon DW, Kim BO, Park SH, Lee NH, Jeon HK, Jang Y, Kim HS. Six-month versus 12-month  
1279 dual antiplatelet therapy after implantation of drug-eluting stents: the Efficacy of Xience/Promus  
1280 Versus Cypher to Reduce Late Loss After Stenting (EXCELLENT) randomized, multicenter  
1281 study. Circulation. 2012;125(3):505-13.
- 1282 20. Kim BK, Hong MK, Shin DH, Nam CM, Kim JS, Ko YG, Choi D, Kang TS, Park BE, Kang WC,  
1283 Lee SH, Yoon JH, Hong BK, Kwon HM, Jang Y; RESET Investigators. A new strategy for  
1284 discontinuation of dual antiplatelet therapy: the RESET Trial (REal Safety and Efficacy of 3-month  
1285 dual antiplatelet Therapy following Endeavor zotarolimus-eluting stent implantation). J Am Coll  
1286 Cardiol. 2012;60(15):1340-8.

1287

1288

## 1289 22. Appendix

1290 Appendix 1. Study Institution, Principal investigator, Sub-investigator and Clinical Research  
1291 Coordinator

| Study Institution |                                                                | Principal investigator |            |                     |
|-------------------|----------------------------------------------------------------|------------------------|------------|---------------------|
|                   |                                                                | Name                   | Department | Position            |
| 01                | The Catholic University of Korea, Seoul ST. Mary's Hospital    | Kiyuk Chang            | Cardiology | Professor           |
| 02                | Chonnam National University Hospital,                          | Myung Ho Jeong         | Cardiology | Professor           |
| 03                | The Catholic University of Korea, Yeouido ST. Mary's Hospital  | Chul-Soo Park          | Cardiology | Associate Professor |
| 04                | The Catholic University of Korea, Uijungbu ST. Mary's Hospital | Woo Seung Shin         | Cardiology | Associate Professor |
| 05                | The Catholic University of Korea, ST. Paul's Hospital          | Dong Bin Kim           | Cardiology | Associate Professor |
| 06                | The Catholic University of Korea, Bucheon ST. Mary's           | Hee-Yeol Kim           | Cardiology | Associate Professor |

|    | Hospital                                                      |                 |            |                     |
|----|---------------------------------------------------------------|-----------------|------------|---------------------|
| 07 | The Catholic University of Korea, Incheon ST. Mary's Hospital | Doo-Soo Chun    | Cardiology | Professor           |
| 08 | The Catholic University of Korea, ST. Vincent's Hospital      | Keun Woon Moon  | Cardiology | Professor           |
| 09 | The Catholic University of Korea, Daejeon ST. Mary's Hospital | Mahn-Won Park   | Cardiology | Assistant Professor |
| 10 | Gangneung Asan Hospital                                       | Sang Shik Jung  | Cardiology | Professor           |
| 11 | Gangwon University Hospital                                   | Byung Ryeul Cho | Cardiology | Professor           |
| 12 | Kyungsang University Hospital                                 | Jin Shin Ko     | Cardiology | Professor           |
| 13 | Kyunghee University Hospital                                  | Won Kim         | Cardiology | Professor           |
| 14 | Keimyung University Hospital                                  | Seung Ho Huh    | Cardiology | Professor           |
| 15 | Daegu Catholic University Hospital                            | Ki Sik Kim      | Cardiology | Professor           |
| 16 | Boramae University                                            | Sang Hyeun Kim  | Cardiology | Professor           |
| 17 | Suncheon ST Carollo General Hospital                          | Chang Hyeun Cho | Cardiology | Professor           |
| 18 | Sunchenhyang University Chunan Hospital                       | Sang Ho Park    | Cardiology | Professor           |
| 19 | Aju University Hospital                                       | Myung Ho Yoon   | Cardiology | Professor           |
| 20 | Youngnam University Hospital                                  | Jong Sun Park   | Cardiology | Professor           |
| 21 | Ulsan University Hospital                                     | Kyung Min Park  | Cardiology | Professor           |
| 22 | Wonju Severance University Hospital                           | Seung Hwan Lee  | Cardiology | Professor           |
| 23 | Eulju University Hospital                                     | Kyung Tae Chung | Cardiology | Professor           |
| 24 | Inje University Ilsan Baek Hospital                           | Joon Hyeung Do  | Cardiology | Professor           |
| 25 | Chungang University Hospital                                  | Sang Wook Kim   | Cardiology | Professor           |
| 26 | Chungju ST Mary's Hospital                                    | Joo Yeoul Baek  | Cardiology | Professor           |
| 27 | Pohang ST Mary's Hospital                                     | Byung Joo Shim  | Cardiology | Professor           |
| 28 | Kangbook Samsung Hospital                                     | Ki Chul Sung    | Cardiology | Professor           |
| 29 | Samsung Changwon Hospital                                     | Ju Hyun Oh      | Cardiology | Professor           |
| 30 | Busan University Hospital                                     | Kwang Soo Cha   | Cardiology | Professor           |
| 31 | Changwon Kyungsang University Hospital                        | Young Hoon Cho  | Cardiology | Professor           |
| 32 | Inje University Busan Baek Hospital                           | Jae Sik Jang    | Cardiology | Professor           |

1292  
1293  
1294**Sub-investigator**

| Study Institution                                               | Name            | Department |
|-----------------------------------------------------------------|-----------------|------------|
| The Catholic University of Korea, Seoul ST. Mary's Hospital     | Wook Sung Chung | Cardiology |
| The Catholic University of Korea, Seoul ST. Mary's Hospital     | Pum Jun Kim     | Cardiology |
| The Catholic University of Korea, Seoul ST. Mary's Hospital     | Hun Jun Park    | Cardiology |
| The Catholic University of Korea, Seoul ST. Mary's Hospital     | Ik Jun Choi     | Cardiology |
| The Catholic University of Korea, Seoul ST. Mary's Hospital     | Sung Min Yim    | Cardiology |
| The Catholic University of Korea, Seoul ST. Mary's Hospital     | Eun Ho Choo     | Cardiology |
| The Catholic University of Korea, Seoul ST. Mary's Hospital     | Jin Jin Kim     | Cardiology |
| The Catholic University of Korea, Seoul ST. Mary's Hospital     | Min Ok Chang    | Cardiology |
| The Catholic University of Korea, Seoul ST. Mary's Hospital     | Jae Kyeong Kim  | Cardiology |
| The Catholic University of Korea, Seoul ST. Mary's Hospital     | Dong Kyu Moon   | Cardiology |
| Chonnam National University Hospital,                           | Youngkeun Ahn   | Cardiology |
| The Catholic University of Korea, Yeouido ST. Mary's Hospital   | Keun Ho Park    | Cardiology |
| The Catholic University of Korea, Yeouido ST. Mary's Hospital   | Yun-Seok Choi   | Cardiology |
| The Catholic University of Korea, Yeouido ST. Mary's Hospital   | Woo Baek Chung  | Cardiology |
| The Catholic University of Korea, Incheon ST. Mary's Hospital   | Dong Il Shin    | Cardiology |
| The Catholic University of Korea, Incheon ST. Mary's Hospital   | Seok Min Seo    | Cardiology |
| The Catholic University of Korea, Uijeongbu ST. Mary's Hospital | Jong Min Lee    | Cardiology |
| The Catholic University of Korea, Uijeongbu ST. Mary's Hospital | Yoon Seok Koh   | Cardiology |
| The Catholic University of Korea, Uijeongbu ST. Mary's Hospital | Min Kyu Kang    | Cardiology |
| The Catholic University of Korea, ST. Vincent's Hospital        | Ki Dong Yoo     | Cardiology |
| The Catholic University of Korea, ST. Vincent's Hospital        | Ji Hun Kim      | Cardiology |
| The Catholic University of Korea, ST. Paul's Hospital           | Seong Won Chang | Cardiology |



|                                                               |                 |            |
|---------------------------------------------------------------|-----------------|------------|
| The Catholic University of Korea, ST. Paul's Hospital         | Byung Hee Hwang | Cardiology |
| The Catholic University of Korea, Daejeon ST. Mary's Hospital | Chan Joon Kim   | Cardiology |
| The Catholic University of Korea, Daejeon ST. Mary's Hospital | Kyung Min Park  | Cardiology |
| Gangdong Kyung Hee University Hospital                        | Jin Man Cho     | Cardiology |
| Kyungbook University Hospital                                 | Jang Hoon Lee   | Cardiology |
| Keimyung University Hospital                                  | Seung Ho Heo    | Cardiology |
| Daegu Catholic University Hospital                            | Jin Bae Lee     | Cardiology |
| Ulsan University Hospital                                     | Seo Hee Ahn     | Cardiology |
| Eulji University Hospital                                     | Yoo Jung Choi   | Cardiology |
| Eulji University Hospital                                     | Won Ho Kim      | Cardiology |
| Eulji University Hospital                                     | Sang Hyun Park  | Cardiology |
| Inje University Ilsan Baek Hospital                           | Seung Yoon Lee  | Cardiology |

1295

1296
