# Supplementary material
Source: PubMed Central journal article supplement (PMC10733848)
Supplement: jamacardiol-e234587-s002.pdf [file jamacardiol-e234587-s002.pdf]

1  
2  
3  
4  
5  
6  
7  
8  
9  
10  
11  
12  
13  
14  
15  
16  
17  
18  
19  
20  
21  
22  
23  
24  
25  
26  
27

## **STATISTICAL ANALYSIS PLAN**

**A Prospective, Multicenter, Randomized, Open-label Trial to Compare  
Efficacy and Safety of Clopidogrel vs Ticagrelor in Stabilized Patients  
with Acute Myocardial Infarction after Percutaneous Coronary  
Intervention**

**Protocol No.: TALOS-AMI**

**Protocol Version: 7.0**

**Development date: 2018.06.18**

28  
29  
30  
31  
32  
33  
34  
35  
36  
37  
38  
39  
40  
41

# STATISTICAL ANALYSIS PLAN

## SIGNITURE PAGE

Protocol No.: TALOS-AMI

Protocol Version: 7.0

Kiyuk Chang, (title)

\_\_\_\_\_  
*Printed Name*

\_\_\_\_\_  
*signature*

\_\_\_\_\_  
*Date(YYYY/MM/DD)*

42

Mahn-WonPark, (title)

\_\_\_\_\_  
*Printed Name*

\_\_\_\_\_  
*signature*

\_\_\_\_\_  
*Date(YYYY/MM/DD)*

43

Chan Jon Kim, (title)

\_\_\_\_\_  
*Printed Name*

\_\_\_\_\_  
*signature*

\_\_\_\_\_  
*Date(YYYY/MM/DD)*

44

Hyeon Woo Lim, (title)

\_\_\_\_\_  
*Printed Name*

\_\_\_\_\_  
*signature*

\_\_\_\_\_  
*Date(YYYY/MM/DD)*

45 **TABLE OF CONTENTS**

46

47 **LIST OF ABBREVIATIONS AND DEFINITION OF TERMS**

48

49 **1.0 INTRODUCTION**

50 **2.0 STUDY OBJECTIVE**

51 **3.0 STUDY DESIGN**

52 **4.0 ENROLLMENT**

53 **5.0 STUDY ENDPOINTS**

54 **5.1 PRIMARY ENDPOINTS**

55 **5.2 SECONDARY ENDPOINTS**

56

57 **6.0 SUBJECT INCLUSION / EXCLUSION CRITERIA**

58 **6.1 SUBJECT INCLUSION CRITERIA**

59 **6.2 SUBJECT EXCLUSION CRITERIA**

60 **7.0 STUDY PROCEDURES**

61 **7.1 SCREENING PERIOD**

62 **7.2 RANDOMIZATION**

63 **8.0 STATISTICAL ANALYSIS**

64 **8.1 SAMPLE SIZE CALCULATION**

65 **8.2 ANALYSIS POPULATION**

66 **8.3 PRIMARY ENDPOINT ANALYSIS**

67 **8.4 Main SECONDARY ENDOINT ANALYSIS**

68 **8.5 Other Secondary Endpoint Analyses**

69 **8.6 Analysis of Subgroups**

70 **8.7 GENERAL STATISTICAL METHODOLOGY**

71 **8.8 MISSING DATA**

72

73

74 **9.0 REFERENCES**

75

76

77

78 **1.0 Introduction**

79

80 In AMI, adequate platelet inhibition is essential to reduce the risk of recurrent thrombotic  
81 events. For this reason, dual antiplatelet therapy (DAPT) with aspirin and a P2Y12 inhibitor  
82 has become the current mainstay of pharmacological treatment in AMI patients managed  
83 with PCI. Although, clopidogrel has an indication for use in AMI<sup>1</sup>, potent P2Y12 inhibitors,  
84 ticagrelor and prasugrel, compared with clopidogrel have shown significantly improved  
85 clinical outcomes in terms of reducing recurrent ischemic events in large randomized trials<sup>2,3</sup>.  
86 Thus, current guidelines strongly recommended potent P2Y12 inhibitors for 1 year in AMI  
87 patients undergoing PCI<sup>1</sup>.

88

89 However, along with strong anti-platelet efficacy, a higher risk for bleeding was observed for  
90 potent P2Y12 inhibitors compared with clopidogrel in these randomized trials. Intriguingly,  
91 benefit due to reduction of ischemic events and harm due to bleeding events predominates  
92 at different time points during potent P2Y12 inhibitors treatment<sup>4</sup>. Although the ischemic  
93 benefit was consistent throughout the first year after the index event, the benefit of ticagrelor  
94 and prasugrel over clopidogrel for reducing thrombotic risk was prominent in the early period  
95 after acute coronary syndrome (ACS) when the risk of ischemic complications was highest.  
96 In the primary PCI cohort of the PLATO (Platelet Inhibition and Patient Outcomes) trial,  
97 ticagrelor showed larger risk reduction for stent thrombosis (ST) during the first 30 days of  
98 treatment compared with clopidogrel but the difference decreased over time<sup>5</sup>. Similarly, in  
99 the TRITON-TIMI (Therapeutic Outcomes by Optimising Platelet Inhibition with Prasugrel-  
100 Thrombolysis In Myocardial Infarction) 38 trial, prasugrel led to a 25% reduction in MI during  
101 the first month<sup>6</sup>. On the other hands, the opposite was true for bleeding. Landmark analyses  
102 of these two randomized trials revealed that the bleeding risk was similar in the early period  
103 of treatment, but there was a larger difference during the chronic period of treatment  
104 between potent P2Y12 inhibitors and clopidogrel. Actually most bleeding events  
105 predominantly occurred during the maintenance period of treatment<sup>7,8</sup>. As a consequence, to  
106 optimize net clinical benefit between early ischemic benefit and late bleeding risks in AMI  
107 patients, many physicians have focused on the novel therapeutic strategy of stepwise de-  
108 escalation using potent P2Y12 inhibitors only in the acute phase of treatment (during the  
109 first 30 days) and using the less potent clopidogrel during the chronic phase of treatment  
110 (after the first 30 days).

111

112 Despite of the evidence for the consistent efficacy and safety of potent P2Y12 inhibitors with

113 long-term treatment, de-escalation after ACS is quite common in clinical practice<sup>9-12</sup>. Data  
114 have shown that the prevalence of de-escalation during hospitalization ranges from 5% to  
115 14%<sup>10,11</sup> and after discharge ranges from 15% to 28%<sup>12</sup>. However, at present, data from  
116 large-scale clinical studies on the topic of de-escalating antiplatelet strategy are very limited  
117 and the results of small studies are conflicting<sup>9,13</sup>. Recently, some randomized trials of de-  
118 escalation enrolling ACS patients have been reported<sup>13,14</sup>. The randomized, open-label,  
119 single-center TOPIC trial (Timing of Optimal Platelet Inhibition After Acute Coronary  
120 Syndrome) showed that in patients who have been event free for the first month after an  
121 ACS on a combination of aspirin plus a potent P2Y<sub>12</sub> inhibitor (ticagrelor or prasugrel), de-  
122 escalation to aspirin plus clopidogrel strategy was associated with reduction of bleeding  
123 complications without increase in ischemic events<sup>13</sup>. Although this study did not show any  
124 differences in ischemic events between groups, play of chance cannot be ruled out given the  
125 limited sample size of the trial<sup>15</sup>. The open-label, multicenter TROPICAL-ACS trial (Testing  
126 Responsiveness to Platelet Inhibition Chronic Antiplatelet Treatment for ACS) randomized  
127 patients with ACS undergoing PCI to either standard treatment with prasugrel for 12 months  
128 or a de-escalation regimen (1 week of prasugrel followed by 1 week of clopidogrel and  
129 platelet function testing [PFT]–guided maintenance therapy with clopidogrel or prasugrel  
130 from day 14 after hospital discharge)<sup>14</sup>. The trial showed that a strategy of PFT-guided de-  
131 escalation of antiplatelet treatment was noninferior to standard treatment with prasugrel at 1  
132 year in terms of net clinical benefit. The PFT-guided de-escalation strategy did not show any  
133 increase in ischemic events, although there was not a statistically significant reduction in  
134 bleeding. However, some experts expressed concerns about a lack of power due to the low  
135 number of endpoints events<sup>16</sup>. Furthermore, the routine use of PFT in ACS patients  
136 undergoing PCI is limited because it is not widely available in real world clinical practice.  
137 And, although prasugrel and ticagrelor have similar levels of platelet inhibition, it might be  
138 argued that the study findings cannot be applied to ticagrelor because its pleiotropic effects  
139 have been advocated to contribute to its overall benefits<sup>17</sup>. In addition, there are no studies  
140 for the de-escalation of antiplatelet treatment enrolling only AMI patients treated by PCI with  
141 newer generation DES. In PLATO study, only 60% of population were scheduled for PCI and  
142 the patients who underwent PCI received older generation DES.

143

144 Therefore, we sought to investigate the efficacy and safety of switching from ticagrelor to  
145 clopidogrel in AMI patients with no adverse event during the first month after index PCI with  
146 second generation DES.

147

148 **2.0 Study Objective**

149 The purpose of this trial is to investigate the efficacy and safety of switching from ticagrelor  
150 to clopidogrel in stabilized patients with AMI with no adverse events during the first month  
151 after an index PCI.

152

153 **3.0 Study Design**

154 This is a prospective, randomized, open-label, multi-center study. Qualified study patients  
155 who conduct screening period for 1 month will be randomized 1:1 to receive either  
156 clopidogrel + aspirin as a treatment group or ticagrelor + aspirin as a control one.

157

158 **4.0 Enrollment**

159 A total of 2590 qualified patients will be enrolled into the study.

160

161 **5.0 Study Endpoints**

162 5.1 Primary Endpoint

163 Composite endpoint of MACCE (CV death, MI, stroke) + BARC bleeding (type 2, 3, or 5)  
164 between 1 and 12 months after AMI.

165 5.2 Main Secondary Endpoints

166 1. BARC bleeding (type 2, 3, or 5) between 1 and 12 months after AMI.

167 2. Composite endpoint of MACCE (CV death, MI, stroke) + BARC bleeding (type 3, or 5)  
168 between 1 and 12 months after AMI.

169 3. Composite endpoint of MACCE (CV death, MI, stroke) between 1 and 12 months after  
170 AMI.

171 5.3 Other Secondary Endpoints

172 1. All-cause death between 1 and 12 months after AMI

173 2. CV death between 1 and 12 months after AMI

174 3. Recurrent MI between 1 and 12 months after AMI

- 175 4. Stroke between 1 and 12 months after AMI
- 176 5. Ischemia driven revascularization including PCI or CABG between 1 and 12 months
- 177 after AMI
- 178 6. Stent thrombosis (definite or probable) between 1 and 12 months after AMI
- 179 7. Adverse event at 12 months after AMI (dyspnea)

180

181 Bleeding according to the BARC definition and definite or probable stent thrombosis definition

182 are as follows<sup>18</sup>.

183 Table 1. BARC Definition

| BARC Definition |                                                                                                                                                                                                                                                                                                                                                                                                                                               |
|-----------------|-----------------------------------------------------------------------------------------------------------------------------------------------------------------------------------------------------------------------------------------------------------------------------------------------------------------------------------------------------------------------------------------------------------------------------------------------|
| Type 0          | No bleeding                                                                                                                                                                                                                                                                                                                                                                                                                                   |
| Type 1          | Bleeding that is not actionable and does not cause the patient to seek unscheduled performance of studies, hospitalization, or treatment by a health care professional; may include episodes leading to self-discontinuation of medical therapy by the patient without consulting a health care professional                                                                                                                                  |
| Type 2          | Any overt, actionable sign of haemorrhage (e.g. more bleeding than would be expected for a clinical circumstance; including bleeding found by imaging alone) that does not fit the criteria for Types 3, 4, or 5, but does meet at least one of the following criteria:<br>(1) requiring non-surgical, medical intervention by a health care professional (2) leading to hospitalization or increased level of care (3) prompting evaluation. |
| Type 3          | Type 3a<br>Overt bleeding plus hemoglobin drop of 3 to <5*g/dL (provided hemoglobin drop is related to bleed)<br>Any transfusion with overt bleeding                                                                                                                                                                                                                                                                                          |
|                 | Type 3b<br>Overt bleeding plus hemoglobin drop ≥ 5*g/dL (provided STEMI, NSTEMI drop is related to bleed)<br>Cardiac tamponade<br>Bleeding requiring surgical intervention for control (excluding dental/nasal/skin/hemorrhoid)<br>Bleeding requiring intravenous vasoactive agents                                                                                                                                                           |

|        |         |                                                                                                                                                                                                                                                                                                                                             |
|--------|---------|---------------------------------------------------------------------------------------------------------------------------------------------------------------------------------------------------------------------------------------------------------------------------------------------------------------------------------------------|
|        | Type 3c | Intracranial hemorrhage (does not include microbleeds or hemorrhagic transformation; does include intraspinal)<br>Subcategories; confirmed by autopsy or imaging or LP<br>Intra-ocular bleed compromising vision                                                                                                                            |
| Type 4 |         | Coronary artery bypass graft-related bleeding<br>Perioperative intracranial bleeding within 48 hours<br>Reoperation after closure of sternotomy for the purpose of controlling bleeding<br>Transfusion of $\geq 5$ U whole blood or packed red blood cells within a 48 hour period†<br>Chest tube output $\geq 2$ L within a 24-hour period |
| Type 5 | Type 5a | Probable fatal bleeding: no autopsy or imaging confirmation, but clinically suspicious                                                                                                                                                                                                                                                      |
|        | Type 5b | Definite fatal bleeding: overt bleeding or autopsy or imaging confirmation                                                                                                                                                                                                                                                                  |

184 \*:Corrected for transfusion (1 U packed red blood cells or 1 U whole blood =1 g/dL hemoglobin)

185 † :Cell saver products are not counted.

186

187 Table 2 Stent Thrombosis Definition

| Stent thrombosis |                                                                                                                                                                                                                                                                                                                                                                                                                                                                 |
|------------------|-----------------------------------------------------------------------------------------------------------------------------------------------------------------------------------------------------------------------------------------------------------------------------------------------------------------------------------------------------------------------------------------------------------------------------------------------------------------|
| Definite*        | <p>Angiographic confirmation of stent thrombosis†</p> <p>The presence of a thrombus‡ that originates in the stent or in the segment 5 mm proximal or distal to the stent and presence of at least 1 of the following criteria within a 48-hour time window:</p> <p>Acute onset of ischemic symptoms at rest</p> <p>New ischemic ECG changes that suggest acute ischemia Typical rise and fall in cardiac biomarkers (refer to definition of spontaneous MI)</p> |



|          |                                                                                                                                                                                                                                                                                                                                                                                                                                                                                                                                                                                                                                                                                                                                                                     |
|----------|---------------------------------------------------------------------------------------------------------------------------------------------------------------------------------------------------------------------------------------------------------------------------------------------------------------------------------------------------------------------------------------------------------------------------------------------------------------------------------------------------------------------------------------------------------------------------------------------------------------------------------------------------------------------------------------------------------------------------------------------------------------------|
|          | <p>Non occlusive thrombus</p> <p>Intracoronary thrombus is defined as a (spheric, ovoid, or irregular) noncalcified filling defect or lucency surrounded by contrast material (on 3 sides or within a coronary stenosis) seen in multiple projections, or persistence of contrast material within the lumen, or a visible embolization of intraluminal material downstream.</p> <p>Occlusive thrombus</p> <p>TIMI 0 or TIMI 1 intrastent or proximal to a stent up to the most adjacent proximal side branch or main branch (if originates from the side branch).</p> <p>Pathological confirmation of stent thrombosis</p> <p>Evidence of recent thrombus within the stent determined at autopsy or via examination of tissue retrieved following thrombectomy.</p> |
| Probable | <p>Clinical definition of probable stent thrombosis is considered to have occurred after intracoronary stenting in the following cases:</p> <p>Any unexplained death within the first 30 days§</p> <p>Irrespective of the time after the index procedure, any MI that is related to documented acute ischemia in the territory of the implanted stent without angiographic confirmation of stent thrombosis and in the absence of any other obvious cause</p>                                                                                                                                                                                                                                                                                                       |

188 \*Definite stent thrombosis is considered to have occurred by either angiographic or pathological  
189 confirmation.

190 †The incidental angiographic documentation of stent occlusion in the absence of clinical signs or  
191 symptoms is not considered a confirmed stent thrombosis (silent occlusion).

192 ‡Intracoronary thrombus.

193 §For studies with ST-elevation MI population, one may consider the exclusion of unexplained death  
194 within 30 days as evidence of probable stent thrombosis.

195

196 **6.0. Subject Inclusion / Exclusion Criteria**

197 6.1 Subject Inclusion Criteria

198 Subject should meet all of the following criteria.

- 199 1. Age  $\geq$  18 years
- 200 2. Patients with AMI (STEMI or NSTEMI) who are administered aspirin and ticagrelor for  
201 30 days after successful PCI with newer-generation drug eluting stents (DES)
- 202 3. Female patients with childbearing potential who agree to mandatory pregnancy test  
203 and have committed to using adequate contraception
- 204 4. Subjects who agree to the study protocol and the schedule of clinical follow-up, and  
205 provides informed, written consent, as approved by the appropriate IRB of the  
206 respective institution

207

208 6.2 Subject Exclusion Criteria

209 Subject should be excluded if they apply to any of the following criteria.

- 210 1. Cardiogenic shock
- 211 2. Active internal bleeding, bleeding diathesis, or coagulopathy
- 212 3. Gastrointestinal bleeding or genitourinary bleeding, hemoptysis, or vitreous  
213 hemorrhage within 2 months
- 214 4. Major surgery within 6 weeks
- 215 5. History of intracranial bleeding, intracranial neoplasm, intracranial arteriovenous  
216 malformation, or intracranial aneurysm
- 217 6. Anemia (hemoglobin  $<$  10 g/dL) or platelet count of less than 100,000/mm<sup>3</sup> at the  
218 time of screening
- 219 7. Concomitant treatment with oral anticoagulant agent (vitamin-K antagonists or novel  
220 oral anticoagulants such as dabigatran, rivaroxaban, apixaban, or edoxaban)
- 221 8. Daily treatment with non-steroidal anti-inflammatory drug (NSAIDs) or  
222 cyclooxygenase-2 inhibitors
- 223 9. Malignancy or life expectancy of less than one year
- 224 10. Moderate or severe hepatic dysfunction (Child Pugh B or C)

- 225 11. Symptomatic patients with sinus bradycardia (sick sinus syndrome) or
- 226 atrioventricular (AV) block (AV block grade II or III, bradycardia-induced syncope;
- 227 except for patients implanted with permanent pacemaker)
  
- 228 12. Symptomatic patients with chronic obstructive pulmonary disease (Medical research
- 229 council grade  $\geq 3$ )
  
- 230 13. Intolerance of or allergy to aspirin, ticagrelor or clopidogrel
  
- 231 14. Subjects who are under renal replacement therapy due to end-stage renal disease
- 232 or who have history of kidney transplantation
  
- 233 15. Galactose intolerance, lactase insufficiency or glucose-galactose malabsorption
  
- 234 16. Subjects who are actively participating in another clinical trial with 3 months of
- 235 randomization (except for observational study)
  
- 236 17. Pregnant and/or lactating women
  
- 237 18. Subjects considered unsuitable for this study by the investigator

238

239 **7.0 Study Procedure**

240 7.1 Screening period

241

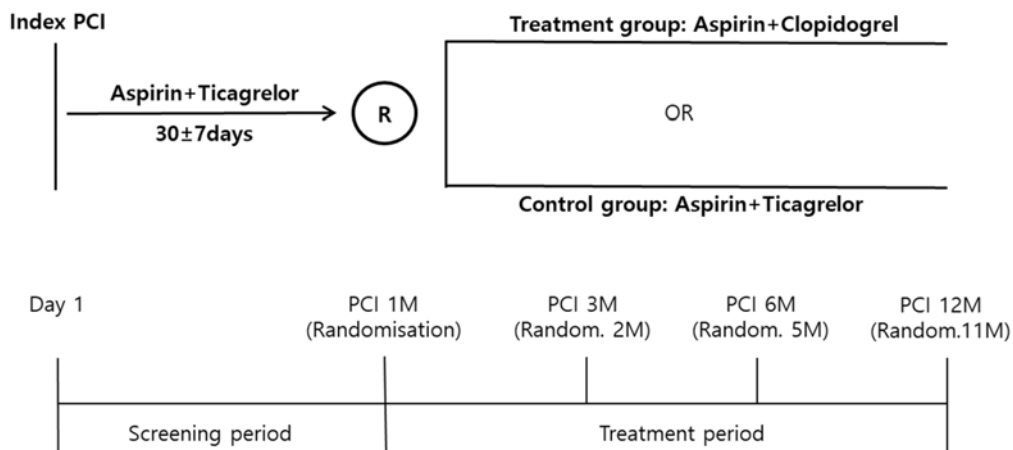

242

243

244 To conduct screening AMI patients based on the inclusion/exclusion criteria who (1) have  
245 been treated with ticagrelor + aspirin at least  $30 \pm 7$  days after an index PCI, (2) received full  
246 explanation of the study details, (3) given written consent.

247

## 248 7.2 Randomization

249 Randomization will occur centrally. To randomize a patient, the investigative site will enter  
250 the subject into the designated electronic system and obtain the treatment assignment  
251 (clopidogrel + aspirin or ticagrelor + aspirin) in a 1:1 ratio. At 1 month visit after AMI, eligible  
252 subjects were assigned to each treatment group following an access to the interactive web-  
253 based response system (IWRS, Medical Excellence Inc., Seoul, Korea) by the investigator or  
254 designee. Randomization sequence was created by an independent statistician using SAS  
255 9.3 (SAS Institute Inc. Cary, NC, USA) statistical software and was stratified by study center  
256 and type of AMI (STEMI or NSTEMI) and with a 1:1 allocation using hidden random block  
257 size.

258

## 259 **8.0 Statistical Analysis**

### 260 8.1 Sample Size Calculation

261 The present study is designed to show non-inferiority of the treatment group with aspirin plus  
262 clopidogrel versus the control group with aspirin plus ticagrelor. Sample size is based on the  
263 combined occurrence rate of ischemic and bleeding events between 1 and 12 months after  
264 AMI. According to the PLATO investigators, the event rate of primary efficacy endpoint  
265 including CV death, MI or stroke was 5.28% in the ticagrelor group and 6.60% in the  
266 clopidogrel group between 1 and 12 months after the index event<sup>2</sup>. In the meantime, since  
267 there were no reported data on the bleeding event rate associated with ticagrelor from 1 to  
268 12 months after AMI, especially BARC bleeding rate at the time of the present study design,  
269 we assumed the event rate of BARC 2, 3 and 5 bleeding from the event rates of non-CABG  
270 related PLATO major or minor bleeding during a year of ticagrelor therapy (8.7%) and non-  
271 CABG related major bleeding of first 30 days (2.47%) and after 30 days (2.17%) in the  
272 PLATO trial. For the event rate of BARC 2, 3 and 5 bleeding associated with clopidogrel  
273 from 1 to 12 months after AMI, the event rate was assumed from the event rates of non-  
274 CABG related PLATO major or minor bleeding during a year of clopidogrel therapy (7.0%)  
275 and non-CABG related major bleeding of first 30 days (2.21%) and after 30 days (1.65%) in  
276 the clopidogrel group of the PLATO trial<sup>7</sup>.

277 After applying mathematical formula, the estimated BARC 2, 3 and 5 bleeding would be  
278 4.07% in the ticagrelor group and 2.99% in the clopidogrel group. Thus, the expected event

279 rate of the primary endpoint from 1 to 12 months after index PCI was 9.35% (ischemic event  
280 of 5.28% + bleeding event of 4.07%) in the ticagrelor group and 9.59% (ischemic event of  
281 6.6% + bleeding event of 2.99%) in the clopidogrel group. We chose the non-inferiority  
282 margin in accordance with clinical judgment and other relevant studies with a non-inferiority  
283 design at the present study design. The non-inferiority margin of two contemporary trials of  
284 antiplatelet treatment after PCI that were available up to that time was equivalent to a 40%  
285 increase in the expected event rate<sup>18, 19</sup>. The steering committee decided that the non-  
286 inferiority margin in our study should be less than a 40% increase compared to the expected  
287 event rate of the control group. After considering clinically acceptable relevance and the  
288 feasibility of study recruitment, we finally selected the non-inferiority margin of 3.0%, which  
289 was equivalent to a 32% increase in the expected event rate. Sample size calculations  
290 (PASS 13, NCSS, LLC, Kaysville, Utah, USA) were performed based on one-sided  $\alpha$  of 0.05  
291 and a power of 80%. To achieve these goals, a total of 2,230 patients were needed. With a  
292 loss to follow-up rate of 10%, a total of 2,590 (1,295 patients in each group) patients were  
293 required.

294

## 295 8.2 Analysis population

296

### 297 The Intent to Treat (ITT) Population

298

299 The ITT population is defined as all randomized patients at 1 month after AMI, regardless of  
300 their adherence with the entry criteria, regardless of treatment they actually received, and  
301 regardless of subsequent withdrawal from treatment or deviation from the protocol<sup>19</sup>. Only  
302 some specific reasons that might cause an exclusion of a patient from the ITT population:

303

- 304 ● No treatment was applied at all
- 305 ● No data are available after randomization

306

### 307 The Per Protocol (PP) Population

308

309 The PP population is the subset of ITT population consisting of all patients who receive and  
310 retain the treatment during 12 months after PCI<sup>19</sup>. Some specific reasons that might cause  
311 an exclusion of a patient from the PP population:

312

- 313 ● Violation of entry criteria including inclusion and exclusion criteria
- 314 ● Withdrawal of consent

- 315 ● Concomitant treatment of oral anticoagulant agent (vitamin-K antagonists or novel  
 316 oral anticoagulants such as dabigatran, rivaroxaban, apixaban, or edoxaban) during  
 317 the study period
- 318 ● Poor compliance
- 319 - Conversion from ticagrelor + aspirin to clopidogrel + aspirin during RCT  
 320 procedure and vice versa
- 321 - Discontinuation of test or control drugs for 7 days or longer
- 322 \* In the cases of withdrawal of consent, concomitant treatment of oral anticoagulation  
 323 agent and poor compliance, their data will be used for statistical analyses until such  
 324 events occur.
- 325

### 326 8.3 Primary endpoint analysis

327

- 328 ● The non-inferiority test between 1 and 12 months after AMI will be based on the  
 329 Kaplan-Meier estimates. A 95% two-sided confidence interval will be computed for  
 330 the difference event rate (clopidogrel + aspirin) – event rate (ticagrelor + aspirin).  
 331 The clopidogrel group will be judged as non-inferior to the ticagrelor if the upper  
 332 confidence limit is less than the predetermined non-inferiority margin of 3% (absolute  
 333 risk difference).
- 334 ● The hypothesis of non-inferiority test will be based on the difference of proportions.  
 335 Let  $r_T$  denote the true event proportion in the test arm (clopidogrel + aspirin) between  
 336 1 and 12 months, and  $r_C$  denote the true event proportion in the control arm  
 337 (ticagrelor + aspirin) between 1 and 12 months. The hypotheses are

338 
$$H_0: r_T - r_C \geq \Delta$$

339 
$$H_A: r_T - r_C < \Delta$$

340 The  $\Delta$  is the non-inferiority margin, and is taken to be 0.03. The test will be performed  
 341 as a one-sided test at  $\alpha=0.05$ .

342 The null hypothesis shall be rejected at  $\alpha=0.05$  if the one-sided p-value is less  
 343 than 0.05. When this occurs, the upper limit of the two-sided 95% confidence interval  
 344 will be less than 3%.

345 ● The stratified log-rank test will be performed to test the comparison between time to  
 346 event distribution Stratification factors will be prior use of STEMI (yes or no).

- 347 ● Unless otherwise specified, the stratified hazard ratio between two treatment groups  
348 along with CI will be obtained by fitting a stratified Cox model with the treatment  
349 group variables as unique covariate. Stratification factors will be same as above.
- 350 ● If the non-inferiority analysis passed the acceptance criterion, a superiority analysis  
351 will be performed. Statistical superiority is achieved when the upper limit of the two-  
352 sided 95% confidence interval of the risk difference is less than 0%. The type I error  
353 for this analysis is protected by the non-inferiority analysis, and no alpha adjustment  
354 would be appropriate
- 355 ● Subgroup analyses will be performed by the primary endpoint categorized by type of  
356 AMI (STEMI vs NSTEMI), Subgroup analyses will be performed by the primary  
357 endpoint categorized by type of AMI (STEMI vs NSTEMI), Gender, Age ( $\geq 75$  vs  $< 75$ ),  
358 Diabetes, LVEF ( $\geq 40\%$  vs  $< 40\%$ ), eGFR ( $\geq 60$  vs  $< 60$ ), type of implanted stents  
359 (Xience vs Resolute vs Synergy stents), Bleeding risk according to the ARC criteria  
360 (high vs low bleeding risk), CYP2C19 loss-of-function carrier status (carrier vs non-  
361 carrier).
- 362 ● The primary analysis population for primary and secondary endpoints will be the  
363 Intention-to-Treat (ITT) population. The primary endpoint analysis will also be  
364 performed on the Per Protocol (PP) population as subsequent analysis.
- 365 ● A primary endpoint analysis stratified by the institutions as a sensitivity analysis.  
366 Strata will be divided by the accrual number of institution based on quartiles.

367

#### 368 8.4 Main Secondary Endpoint Analyses

369

370 The secondary endpoints will be composed of two families. The first family consists of the  
371 composite endpoint of MACCE (CV death, MI, stroke) plus BARC bleeding (type 2, 3, or 5).  
372 The second family will consist of MACCE plus BARC bleeding (type 3, or 5), MACCE, and  
373 BARC bleeding (type 2, 3, or 5). The endpoints from the second family will be tested  
374 hierarchically, thereby maintaining the study-wise alpha level. These secondary endpoints  
375 will only be tested if both the primary composite endpoint and BARC bleeding are significant  
376 at non-inferiority analysis, and superiority analysis. Composite endpoint of MACCE plus  
377 BARC bleeding (type 3, or 5) will be tested first, and only if this is significant, the composite  
378 endpoint of MACCE only will be tested afterwards. BARC bleeding (type 2, 3, or 5) will be  
379 tested only if both of the above endpoints are tested significant.

380

#### 381 8.5 Other Secondary Endpoint Analyses

382

383 The endpoint in this section will be evaluated according to the secondary endpoints  
384 described in section 5.2 under the ITT population. Most of secondary analyses were  
385 performed by Cox proportional hazard ratio with 95% confidence interval. The following  
386 endpoints will be analyzed in using Chi-square test or Fisher's exact test.

387

- 388 ● The occurrence of dyspnea at 12 months

389

## 390 8.6 Analysis of Subgroups

391

392 The primary and major secondary endpoints will be analyzed in the pre-specified subgroups  
393 to evaluate the consistency of results among subgroups of interest. Outcome will be  
394 evaluated in the following subgroups:

395 1) Type of AMI: STEMI vs NSTEMI

396 2) Gender

397 3) Age: ( $\geq$  vs.  $<$  median and  $\geq$  vs.  $<$ 75 years)

398 4) Diabetes mellitus

399 5) LVEF: ( $\geq$  vs.  $<$  median and  $\geq$  vs.  $<$ 40%)

400 6) eGFR:  $\geq$ 60 vs.  $<$ 60

401 7) type of implanted stents: Xience vs. Resolute vs. Synergy stent

402 8) Bleeding risk according to the ARC criteria: high vs. low bleeding risk

403 9) CYP2C19 loss-of-function allele carrier status: carrier vs. non-carrier

404

## 405 8.7 General Statistical Methodology

406

- 407 ● For continuous variables, summary statistics will include means, standard deviations,  
408 medians and interquartile range based on normality of variables. Groups will be  
409 compared using t-tests or analysis of variance. Where normality violation is observed,  
410 Wilcoxon rank-sum test will be performed to compare groups.

- 411 ● For categorical variables, summary statistics will include numbers and percentages.  
412 Group will be compared using Chi-square test or Fisher's exact test.

- 413 ● Time-dependent variables will be analyzed using the Kaplan-Meier survival curve  
414 and group comparison will be used by log-rank statistics including the number of  
415 patients-at-risk.

416

## 417 8.8 Missing data



418

419

- Missing variables will not be imputed for planned analyses, except where otherwise specified.

420

421

- The primary endpoint will be based on Kaplan-Meier estimates, which automatically account for censored data.

422

423

- For sensitivity, purposes, missing data was imputed the most recent data (Last Observation Carried Forward method).

424

425

426

## 9.0. Reference

427

428

1. Valgimigli M, Bueno H, Byrne RA, Collet JP, Costa F, Jeppsson A, Jüni P, Kastrati A, Kolh P, Mauri L, Montalescot G, Neumann FJ, Petricevic M, Roffi M, Steg PG, Windecker S, Zamorano JL, Levine GN; 2017 ESC focused update on dual antiplatelet therapy in coronary artery disease developed in collaboration with EACTS: The Task Force for dual antiplatelet therapy in coronary artery disease of the European Society of Cardiology (ESC) and of the European Association for Cardio-Thoracic Surgery (EACTS). *Eur Heart J.* 2018;39(3):213-60.

434

435

2. Wallentin L, Becker RC, Budaj A, Cannon CP, Emanuelsson H, Held C, Horrow J, Husted S, James S, Katus H, Mahaffey KW, Scirica BM, Skene A, Steg PG, Storey RF, Harrington RA; PLATO Investigators, Freij A, Thorsén M. Ticagrelor versus clopidogrel in patients with acute coronary syndromes. *N Engl J Med.* 2009;361(11):1045-57.

438

439

3. Wiviott SD, Braunwald E, McCabe CH, Montalescot G, Ruzyllo W, Gottlieb S, Neumann FJ, Ardissino D, De Servi S, Murphy SA, Riesmeyer J, Weerakkody G, Gibson CM, Antman EM; TRITON-TIMI 38 Investigators. Prasugrel versus clopidogrel in patients with acute coronary syndromes. *N Engl J Med.* 2007;357(20):2001-15.

442

443

4. Sibbing D, Aradi D, Jacobshagen C, Gross L, Trenk D, Geisler T, Orban M, Gori T, Hadamitzky M, Merkely B, Kiss RG, Komócsi A, Dézsi CA, Thalmeier A, Löw A, Holdt L, Teupser D, Ince H, Felix SB, Parma R, Malek L, Horstkotte J, Baylacher M, Schwinger R, Rieber J, Mudra H, Hausleiter J, Huber K, Neumann FJ, Koltowski L, Huczek Z, Mehilli J, Massberg S; TROPICAL-ACS Investigators. A randomised trial on platelet function-guided de-escalation of antiplatelet treatment in ACS patients undergoing PCI. Rationale and design of the Testing Responsiveness to Platelet Inhibition on Chronic Antiplatelet Treatment for Acute Coronary Syndromes (TROPICAL-ACS) Trial. *Thromb Haemost.* 2017;117(1):188-95.

451

452

5. Velders MA, Abtan J, Angiolillo DJ, Ardissino D, Harrington RA, Hellkamp A, Himmelmann

- 453 A, Husted S, Katus HA, Meier B, Schulte PJ, Storey RF, Wallentin L, Gabriel Steg P,  
454 James SK; PLATO Investigators. Safety and efficacy of ticagrelor and clopidogrel in  
455 primary percutaneous coronary intervention. *Heart*. 2016;102(8):617-25.
- 456 6. Morrow DA, Wiviott SD, White HD, Nicolau JC, Bramucci E, Murphy SA, Bonaca MP, Ruff  
457 CT, Scirica BM, McCabe CH, Antman EM, Braunwald E. Effect of the novel thienopyridine  
458 prasugrel compared with clopidogrel on spontaneous and procedural myocardial infarction  
459 in the Trial to Assess Improvement in Therapeutic Outcomes by Optimizing Platelet  
460 Inhibition with Prasugrel-Thrombolysis in Myocardial Infarction 38: an application of the  
461 classification system from the universal definition of myocardial infarction. *Circulation*.  
462 2009;119(21):2758-64.
- 463 7. Becker RC, Bassand JP, Budaj A, Wojdyla DM, James SK, Cornel JH, French J, Held C,  
464 Horrow J, Husted S, Lopez-Sendon J, Lassila R, Mahaffey KW, Storey RF, Harrington RA,  
465 Wallentin L. Bleeding complications with the P2Y12 receptor antagonists clopidogrel and  
466 ticagrelor in the PLATElet inhibition and patient Outcomes (PLATO) trial. *Eur Heart J*.  
467 2011;32(23):2933-44.
- 468 8. Antman EM, Wiviott SD, Murphy SA, Voitek J, Hasin Y, Widimsky P, Chandna H, Macias W,  
469 McCabe CH, Braunwald E. Early and late benefits of prasugrel in patients with acute  
470 coronary syndromes undergoing percutaneous coronary intervention: a TRITON-TIMI 38  
471 (TRial to Assess Improvement in Therapeutic Outcomes by Optimizing Platelet Inhibition  
472 with Prasugrel-Thrombolysis In Myocardial Infarction) analysis. *J Am Coll Cardiol*.  
473 2008;51(21):2028-33.
- 474 9. De Luca L, D'Ascenzo F, Musumeci G, Saia F, Parodi G, Varbella F, Marchese A, De Servi  
475 S, Berti S, Bolognese L. Incidence and outcome of switching of oral platelet P2Y12  
476 receptor inhibitors in patients with acute coronary syndromes undergoing percutaneous  
477 coronary intervention: the SCOPE registry. *EuroIntervention*. 2017;13(4):459-66.
- 478 10. Zettler ME, Peterson ED, McCoy LA, Effron MB, Anstrom KJ, Henry TD, Baker BA,  
479 Messenger JC, Cohen DJ, Wang TY; TRANSLATE-ACS Investigators. Switching of  
480 adenosine diphosphate receptor inhibitor after hospital discharge among myocardial  
481 infarction patients: Insights from the Treatment with Adenosine Diphosphate Receptor  
482 Inhibitors: Longitudinal Assessment of Treatment Patterns and Events after Acute  
483 Coronary Syndrome (TRANSLATE-ACS) observational study. *Am Heart J*. 2017;183:62-8.
- 484 11. Alexopoulos D, Xanthopoulou I, Deftereos S, Sitafidis G, Kanakakis I, Hamilos M,  
485 Angelidis C, Petousis S, Stakos D, Parissis H, Vavouranakis M, Davlouros P, Goudevenos  
486 J, Stefanadis C. In-hospital switching of oral P2Y12 inhibitor treatment in patients with  
487 acute coronary syndrome undergoing percutaneous coronary intervention: prevalence,  
488 predictors and short-term outcome. *Am Heart J*. 2014;167(1):68-76 e2.

- 489 12. Bagai A, Peterson ED, Honeycutt E, Effron MB, Cohen DJ, Goodman SG, Anstrom KJ,  
490 Gupta A, Messenger JC, Wang TY. In-hospital switching between adenosine diphosphate  
491 receptor inhibitors in patients with acute myocardial infarction treated with percutaneous  
492 coronary intervention: Insights into contemporary practice from the TRANSLATE-ACS  
493 study. *Eur Heart J Acute Cardiovasc Care*. 2015;4(6):499-508.
- 494 13. Cuisset T, Deharo P, Quilici J, Johnson TW, Deffarges S, Bassez C, Bonnet G, Fourcade  
495 L, Mouret JP, Lambert M, Verdier V, Morange PE, Alessi MC, Bonnet JL. Benefit of  
496 switching dual antiplatelet therapy after acute coronary syndrome: the TOPIC (timing of  
497 platelet inhibition after acute coronary syndrome) randomized study. *Eur Heart J*.  
498 2017;38(41):3070-8.
- 499 14. Sibbing D, Aradi D, Jacobshagen C, Gross L, Trenk D, Geisler T, Orban M, Hadamitzky  
500 M, Merkely B, Kiss RG, Komócsi A, Dézsi CA, Holdt L, Felix SB, Parma R, Klopotoski M,  
501 Schwinger RHG, Rieber J, Huber K, Neumann FJ, Koltowski L, Mehilli J, Huczek Z,  
502 Massberg S; TROPICAL-ACS Investigators. Guided de-escalation of antiplatelet treatment  
503 in patients with acute coronary syndrome undergoing percutaneous coronary intervention  
504 (TROPICAL-ACS): a randomised, open-label, multicentre trial. *Lancet*. 2017;390  
505 (10104) :1747-57.
- 506 15. Angiolillo DJ, Rollini F, Storey RF, Bhatt DL, James S, Schneider DJ, Sibbing D, So DYF,  
507 Trenk D, Alexopoulos D, Gurbel PA, Hochholzer W, De Luca L, Bonello L, Aradi D, Cuisset  
508 T, Tantry US, Wang TY, Valgimigli M, Waksman R, Mehran R, Montalescot G, Franchi F,  
509 Price MJ. International Expert Consensus on Switching Platelet P2Y12 Receptor-Inhibiting  
510 Therapies. *Circulation*. 2017;136(20):1955-75.
- 511 16. Angiolillo DJ. Dual antiplatelet therapy guided by platelet function testing. *Lancet*.  
512 2017;390(10104):1718-20.
- 513 17. Franchi F, Angiolillo DJ. Novel antiplatelet agents in acute coronary syndrome. *Nat Rev*  
514 *Cardiol*. 2015;12(1):30-47.
- 515 18. Mehran R, Rao SV, Bhatt DL, Gibson CM, Caixeta A, Eikelboom J, Kaul S, Wiviott SD,  
516 Menon V, Nikolsky E, Serebruany V, Valgimigli M, Vranckx P, Taggart D, Sabik JF, Cutlip  
517 DE, Krucoff MW, Ohman EM, Steg PG, White H. Standardized bleeding definitions for  
518 cardiovascular clinical trials: a consensus report from the Bleeding Academic Research  
519 Consortium. *Circulation*. 2011;123(23):2736-47.
- 520 19. Fisher LD, Dixon DO, Herson J, Frankowski RK, Hearron MS, Peace KE. Intention to  
521 treat in clinical trials. In: Peace KE, editor. *Statistical issues in drug research and*  
522 *development*. New York: Marcel Dekker; 1990. pp. 331–50
- 523
