# Supplementary material
Source: PubMed Central journal article supplement (PMC10733848)
Supplement: jamacardiol-e234587-s003.pdf [file jamacardiol-e234587-s003.pdf]

## Supplemental Online Content

Lee M, Byun S, Lim S, et al; TALOS-AMI Investigators. Dual antiplatelet therapy de-escalation in stabilized myocardial infarction with high ischemic risk: post hoc analysis of the TALOS-AMI randomized clinical trial. *JAMA Cardiol*. Published online December 20, 2023. doi:10.1001/jamacardio.2023.4587

**eTable 1.** Definitions of Outcomes

**eTable 2.** Baseline Characteristics of AMI Patients With or Without High Ischemic Risk

**eTable 3.** Outcomes by High Ischemic Risk

**eTable 4.** Ischemic Outcomes Stratified by High Ischemic Risk Features

**eTable 5.** Outcomes by High Ischemic Risk and Antiplatelet Strategy (Per-Protocol)

**eTable 6.** Major Post-Hoc Study of Randomized Controlled Trials Investigating De-Escalation Antiplatelet Strategy in ACS/AMI Patients Who Underwent Complex PCI or Had High Ischemic Risk

**eFigure 1.** Patient Flow Diagram of the Present Study

**eFigure 2.** Impact of High Ischemic Risk in Stabilized Post-Myocardial Infarction Patients

**eFigure 3.** Clinical Outcomes of the Antiplatelet Strategy (Per-Protocol)

**eFigure 4.** Subgroup Analysis in Patients With High Ischemic Risk

**eReferences.**

This supplemental material has been provided by the authors to give readers additional information about their work.

**eTable 1. Definitions of Outcomes**

| <b>Clinical outcome</b>                  | <b>Definition</b>                                                                                                                                                                                                                                                                                                                                                                                                                                                                                                                                                                                                                                                                                                                                                                                                                                                                                                                                                                                                                                                                                                                                                                                                                                                                     |
|------------------------------------------|---------------------------------------------------------------------------------------------------------------------------------------------------------------------------------------------------------------------------------------------------------------------------------------------------------------------------------------------------------------------------------------------------------------------------------------------------------------------------------------------------------------------------------------------------------------------------------------------------------------------------------------------------------------------------------------------------------------------------------------------------------------------------------------------------------------------------------------------------------------------------------------------------------------------------------------------------------------------------------------------------------------------------------------------------------------------------------------------------------------------------------------------------------------------------------------------------------------------------------------------------------------------------------------|
| <b>Cardiac death</b>                     | Any death due to proximate cardiac cause (e.g. myocardial infarction, low-output failure, fatal arrhythmia), unwitnessed death and death of unknown cause, all procedure-related deaths including those related to concomitant treatment.                                                                                                                                                                                                                                                                                                                                                                                                                                                                                                                                                                                                                                                                                                                                                                                                                                                                                                                                                                                                                                             |
| <b>Vascular death</b>                    | Any death caused by noncoronary vascular cause (e.g. cerebrovascular, pulmonary embolism, aortic rupture or dissection)                                                                                                                                                                                                                                                                                                                                                                                                                                                                                                                                                                                                                                                                                                                                                                                                                                                                                                                                                                                                                                                                                                                                                               |
| <b>Cardiovascular death</b>              | Composite of cardiac or vascular death                                                                                                                                                                                                                                                                                                                                                                                                                                                                                                                                                                                                                                                                                                                                                                                                                                                                                                                                                                                                                                                                                                                                                                                                                                                |
| <b>Non-cardiovascular death</b>          | Any death which is not covered by cardiac or vascular death, such as infection, malignancy, pulmonary cause, suicide, or trauma.                                                                                                                                                                                                                                                                                                                                                                                                                                                                                                                                                                                                                                                                                                                                                                                                                                                                                                                                                                                                                                                                                                                                                      |
| <b>Myocardial infarction</b>             | The definition of myocardial infarction was based on the 3 <sup>rd</sup> Universal definition of Myocardial infarction. <sup>1</sup>                                                                                                                                                                                                                                                                                                                                                                                                                                                                                                                                                                                                                                                                                                                                                                                                                                                                                                                                                                                                                                                                                                                                                  |
| <b>Stroke</b>                            | Acute episode of neurologic dysfunction attributed to a central nervous system vascular cause, documented by imaging or autopsy                                                                                                                                                                                                                                                                                                                                                                                                                                                                                                                                                                                                                                                                                                                                                                                                                                                                                                                                                                                                                                                                                                                                                       |
| <b>Ischemic stroke</b>                   | Stroke caused by an infarction of central nervous system, documented by imaging                                                                                                                                                                                                                                                                                                                                                                                                                                                                                                                                                                                                                                                                                                                                                                                                                                                                                                                                                                                                                                                                                                                                                                                                       |
| <b>Ischemia-driven revascularization</b> | Ischemia-driven revascularization was defined as any repeated CABG or PCI for a lesion with a diameter stenosis $\geq 50\%$ by quantitative coronary analysis combined with either a corresponding positive functional study, ECG changes, typical ischemic symptoms, or abnormal IVUS ( $\leq 4 \text{ mm}^2$ for non-LM lesions, $\leq 6 \text{ mm}^2$ for LM lesions), or fractional flow reserve $\leq 0.80$ .                                                                                                                                                                                                                                                                                                                                                                                                                                                                                                                                                                                                                                                                                                                                                                                                                                                                    |
| <b>Definite stent thrombosis</b>         | <p>Angiographic confirmation of stent thrombosis<sup>2</sup></p> <p>The presence of a thrombus that originates in the stent or in the segment 5mm proximal or distal to the stent and presence of at least 1 of the following criteria within a 48-hour time window:</p> <ul style="list-style-type: none"> <li>Acute onset of ischemic symptoms at rest</li> <li>New ischemic ECG changes that suggest acute ischemia</li> <li>Typical rise and fall in cardiac biomarkers (refer to definition of spontaneous MI)</li> </ul> <p>Nonocclusive thrombus, intracoronary thrombus is defined as a (spheric, ovoid, or irregular) noncalcified filling defect or lucency surrounded by contrast material (on 3 sides or within a coronary stenosis) seen in multiple projections, or persistence of contrast material within the lumen, or a visible embolization of intraluminal material downstream.</p> <p>Occlusive thrombus, TIMI 0 or TIMI 1 intrastent or proximal to a stent up to the most adjacent proximal side branch or main branch (if originates from the side branch).</p> <p>Pathological confirmation of stent thrombosis</p> <p>Evidence of recent thrombus within the stent determined at autopsy or via examination of tissue retrieved following thrombectomy.</p> |
| <b>Probable stent thrombosis</b>         | <p>Clinical definition of probable stent thrombosis is considered to have occurred after intracoronary stenting in the following cases:</p> <ul style="list-style-type: none"> <li>Any unexplained death within the first 30 days</li> <li>Irrespective of the time after the index procedure, any MI that is related to documented acute ischemia in the territory of the implanted stent without angiographic confirmation of stent thrombosis and in the absence of any other obvious cause</li> </ul>                                                                                                                                                                                                                                                                                                                                                                                                                                                                                                                                                                                                                                                                                                                                                                             |

|                                   |                                                                                                                                                                                                                          |
|-----------------------------------|--------------------------------------------------------------------------------------------------------------------------------------------------------------------------------------------------------------------------|
| <b>Bleeding</b>                   | The definition of bleeding was based on the Bleeding Academic Research Consortium (BARC) definition for bleeding. <sup>3</sup>                                                                                           |
| <b>Type 2</b>                     | Overt bleeding requiring intervention or hospitalization or evaluation (not meeting type 3, 4, or 5)                                                                                                                     |
| <b>Type 3a</b>                    | Overt bleeding + hemoglobin drop of 3 to <5g/dL, or Any transfusion                                                                                                                                                      |
| <b>Type 3b</b>                    | Overt bleeding + hemoglobin drop $\geq$ 5g/dL or bleeding requiring surgical intervention or vasoactive drug, cardiac tamponade                                                                                          |
| <b>Type 3c</b>                    | Intracranial hemorrhage or intra-ocular bleeding compromising vision                                                                                                                                                     |
| <b>Type 5a</b>                    | Probable fatal bleeding; no autopsy or imaging confirmation but clinically suspicious                                                                                                                                    |
| <b>Type 5b</b>                    | Definite fatal bleeding; overt bleeding or autopsy or imaging confirmation                                                                                                                                               |
| <b>Net adverse clinical event</b> | A composite of cardiovascular (CV) death, any myocardial infarction (MI), ischemic stroke, ischemia-driven revascularization, stent thrombosis, or Bleeding Academic Research Consortium (BARC) type 2, 3, or 5 bleeding |

<sup>1</sup> Definitions adapted from Thygesen K. et al., Circulation. 2012;126(16):2020-35.

<sup>2</sup> Definitions adapted from Cutlip DE. et al., Circulation. 2007;115:2344-2351

<sup>3</sup> Definitions adapted from Mehran R. et al., Circulation. 2011;123(23):2736-47

**eTable 2. Baseline Characteristics of AMI Patients With or Without High Ischemic Risk**

|                                      | AMI with high ischemic risk (n=1,371) | AMI without high ischemic risk (n=1,326) | P value |
|--------------------------------------|---------------------------------------|------------------------------------------|---------|
| Age, mean (SD), y                    | 61.7 (11.3)                           | 58.2 (11.1)                              | <0.001  |
| Age ≥75y, No. (%)                    | 200 (14.6)                            | 121 (9.1)                                | <0.001  |
| Female, No. (%)                      | 259 (18.9)                            | 195 (14.7)                               | 0.004   |
| BMI, mean (SD), kg/m <sup>2</sup>    | 24.6 (3.2)                            | 24.5 (3.1)                               | 0.33    |
| Cardiovascular risk factors, No. (%) |                                       |                                          |         |
| DM                                   | 731 (53.3)                            | 0 (0.0)                                  | <0.001  |
| HTN                                  | 796 (58.1)                            | 522 (39.4)                               | <0.001  |
| Dyslipidemia                         | 605 (44.1)                            | 514 (38.8)                               | 0.005   |
| Current smoker                       | 627 (45.7)                            | 717 (54.1)                               | <0.001  |
| Chronic kidney disease               | 305 (22.6)                            | 0 (0.0)                                  | <0.001  |
| Past medical history, No. (%)        |                                       |                                          |         |
| Previous PCI                         | 76 (5.5)                              | 45 (3.4)                                 | 0.007   |
| Previous CABG                        | 2 (0.2)                               | 2 (0.2)                                  | 1.000   |
| Previous CVA                         | 67 (4.9)                              | 36 (2.7)                                 | 0.003   |
| Clinical presentation, No. (%)       |                                       |                                          |         |
| STEMI                                | 684 (49.9)                            | 771 (58.1)                               | <0.001  |
| NSTEMI                               | 687 (50.1)                            | 555 (41.9)                               |         |
| LVEF <40%                            | 124 (9.0)                             | 72 (5.4)                                 | <0.001  |
| PRECISE-DAPT Score, mean (SD)        | 18.8 (10.7)                           | 14.5 (8.3)                               | <0.001  |
| Procedural characteristics, No. (%)  |                                       |                                          |         |
| Radial access                        | 679 (49.5)                            | 673 (50.8)                               | 0.05    |
| Femoral access                       | 692 (50.5)                            | 653 (49.2)                               |         |
| Glycoprotein IIb/IIIa inhibitor      | 338 (24.7)                            | 306 (23.1)                               | 0.35    |
| Infarct related artery (Culprit)     |                                       |                                          |         |
| LM                                   | 45 (3.3)                              | 0 (0.0)                                  | <0.001  |
| LAD                                  | 577 (42.1)                            | 742 (56.0)                               |         |
| LCX                                  | 246 (18.0)                            | 220 (16.6)                               |         |
| RCA                                  | 502 (36.6)                            | 362 (27.3)                               |         |
| Multivessel PCI                      | 678 (49.5)                            | 0 (0)                                    | <0.001  |
| Total stent number, mean (SD)        | 1.3 (0.6)                             | 1.1 (0.3)                                | <0.001  |
| Total stent length, mean (SD), mm    | 32.4 (15.8)                           | 26.9 (9.9)                               | <0.001  |
| Stent diameter, mean (SD), mm        | 3.2 (0.4)                             | 3.2 (0.5)                                | <0.001  |
| Bifurcation PCI with 2 stents        | 15 (1.1)                              | 0 (0.0)                                  | <0.001  |
| IVUS                                 | 352 (25.8)                            | 288 (22.1)                               | 0.02    |
| OCT                                  | 36 (2.7)                              | 46 (3.6)                                 | 0.19    |

Abbreviations: AMI, acute myocardial infarction; BMI, body mass index; CABG, coronary artery bypass graft; CVA, cerebrovascular accident; DAPT, dual antiplatelet therapy; HTN, hypertension; IVUS, intravascular ultrasonography; LAD, left anterior descending; LCX, left circumflex; LM, left main; LVEF, left ventricular ejection fraction; NSTEMI, Non-ST-segment elevation myocardial infarction; OCT, optic coherence tomography; PCI, percutaneous coronary intervention; PRECISE-DAPT, predicting bleeding complications in patients undergoing stent implantation and subsequent dual antiplatelet therapy; RCA, right coronary artery; SD, standard deviation; STEMI, ST-segment elevation myocardial infarction

**eTable 3. Outcomes by High Ischemic Risk**

|                                                                        | <b>AMI with high<br/>ischemic risk<br/>(n=1,371)</b> | <b>AMI without high<br/>ischemic risk<br/>(n=1,326)</b> | <b>HR (95% CI)</b> | <b>P value</b> |
|------------------------------------------------------------------------|------------------------------------------------------|---------------------------------------------------------|--------------------|----------------|
| Primary ischemic outcome                                               | 63 (5.0)                                             | 35 (2.8)                                                | 1.74 (1.15-2.63)   | 0.01           |
| BARC type 2, 3 or 5 bleeding                                           | 53 (4.1)                                             | 56 (4.5)                                                | 0.91 (0.63-1.33)   | 0.64           |
| Net adverse clinical events                                            | 112 (8.7)                                            | 86 (6.9)                                                | 1.26 (0.95-1.67)   | 0.11           |
| Composite of cardiovascular death,<br>myocardial infarction, or stroke | 40 (3.1)                                             | 25 (2.0)                                                | 1.54 (0.94-2.54)   | 0.09           |
| All cause death                                                        | 15 (1.2)                                             | 6 (0.5)                                                 | 2.41 (0.93-6.20)   | 0.07           |
| Cardiovascular death                                                   | 8 (0.6)                                              | 4 (0.3)                                                 | 1.93 (0.58-6.40)   | 0.29           |
| Myocardial infarction                                                  | 23 (1.8)                                             | 9 (0.7)                                                 | 2.47 (1.14-5.33)   | 0.02           |
| Ischemic stroke                                                        | 6 (0.5)                                              | 10 (0.8)                                                | 0.58 (0.21-1.59)   | 0.29           |
| Ischemia-driven revascularization                                      | 50 (4.0)                                             | 21 (1.7)                                                | 2.30 (1.38-3.83)   | 0.001          |
| Stent thrombosis                                                       | 5 (0.4)                                              | 1 (0.1)                                                 | 4.82 (0.56-41.25)  | 0.15           |
| BARC type 2 bleeding                                                   | 36 (2.8)                                             | 41 (3.3)                                                | 0.85 (0.54-1.32)   | 0.46           |
| BARC type 3 or 5 bleeding                                              | 23 (1.8)                                             | 20 (1.6)                                                | 1.11 (0.61-2.02)   | 0.74           |

Abbreviations: AMI, acute myocardial infarction; BARC, bleeding academic research consortium; HR, hazard ratio; MI, myocardial infarction

Data are shown as number (% of Kaplan-Meier estimates)

**eTable 4. Ischemic Outcomes Stratified by High Ischemic Risk Features**

|                                                                     | Number of events (%) |                    | P value |
|---------------------------------------------------------------------|----------------------|--------------------|---------|
|                                                                     | No (N=1966)          | Yes (N=731)        |         |
| <b>Diabetes mellitus</b>                                            |                      |                    |         |
| Primary ischemic outcome                                            | 63(3.2)              | 35(4.8)            | 0.06    |
| Composite of cardiovascular death, myocardial infarction, or stroke | 43(2.2)              | 22(3)              | 0.26    |
| Cardiovascular death                                                | 9(0.5)               | 3(0.4)             | 1.00    |
| Myocardial infarction                                               | 19(1)                | 13(1.8)            | 0.11    |
| Ischemia-driven revascularization                                   | 42(2.1)              | 29(4)              | 0.01    |
| <b>Chronic kidney disease</b>                                       | <b>No (N=2392)</b>   | <b>Yes (N=305)</b> |         |
| Primary ischemic outcome                                            | 80(3.3)              | 18(5.9)            | 0.03    |
| Composite of cardiovascular death, myocardial infarction, or stroke | 50(2.1)              | 15(4.9)            | 0.01    |
| Cardiovascular death                                                | 7(0.3)               | 5(1.6)             | 0.01    |
| Myocardial infarction                                               | 24(1)                | 8(2.6)             | 0.02    |
| Ischemia-driven revascularization                                   | 59(2.5)              | 12(3.9)            | 0.13    |
| <b>Multivessel PCI</b>                                              | <b>No (N=2019)</b>   | <b>Yes (N=678)</b> |         |
| Primary ischemic outcome                                            | 64(3.2)              | 34(5)              | 0.03    |
| Composite of cardiovascular death, myocardial infarction, or stroke | 45(2.2)              | 20(2.9)            | 0.31    |
| Cardiovascular death                                                | 8(0.4)               | 4(0.6)             | 0.51    |
| Myocardial infarction                                               | 22(1.1)              | 10(1.5)            | 0.42    |
| Ischemia-driven revascularization                                   | 46(2.3)              | 25(3.7)            | 0.05    |
| <b>Number of lesions treated <math>\geq 3</math></b>                | <b>No (N=2244)</b>   | <b>Yes (N=453)</b> |         |
| Primary ischemic outcome                                            | 75(3.4)              | 23(4.8)            | 0.14    |
| Composite of cardiovascular death, myocardial infarction, or stroke | 49(2.2)              | 16(3.4)            | 0.14    |
| Cardiovascular death                                                | 10(0.5)              | 2(0.4)             | 1.00    |
| Myocardial infarction                                               | 20(0.9)              | 12(2.5)            | 0.008   |
| Ischemia-driven revascularization                                   | 52(2.3)              | 19(4)              | 0.05    |
| <b>Total stent length &gt;60 mm</b>                                 | <b>No (N=2244)</b>   | <b>Yes (N=453)</b> |         |
| Primary ischemic outcome                                            | 76(3.4)              | 22(4.9)            | 0.13    |
| Composite of cardiovascular death, myocardial infarction, or stroke | 50(2.2)              | 15(3.3)            | 0.18    |

|                                                                     |                    |                    |       |
|---------------------------------------------------------------------|--------------------|--------------------|-------|
| Cardiovascular death                                                | 10(0.4)            | 2(0.4)             | 1.00  |
| Myocardial infarction                                               | 21(0.9)            | 11(2.4)            | 0.01  |
| Ischemia-driven revascularization                                   | 53(2.4)            | 18(4)              | 0.07  |
| <b>Number of stents implanted <math>\geq</math>3</b>                | <b>No (N=2380)</b> | <b>Yes (N=317)</b> |       |
| Primary ischemic outcome                                            | 80(3.4)            | 18(5.7)            | 0.05  |
| Composite of cardiovascular death, myocardial infarction, or stroke | 51(2.1)            | 14(4.4)            | 0.02  |
| Cardiovascular death                                                | 10(0.4)            | 2(0.6)             | 0.64  |
| Myocardial infarction                                               | 22(0.9)            | 10(3.2)            | 0.003 |
| Ischemia-driven revascularization                                   | 57(2.4)            | 14(4.4)            | 0.04  |
| <b>Left Main PCI</b>                                                | <b>No (N=2653)</b> | <b>Yes (N=44)</b>  |       |
| Primary ischemic outcome                                            | 95(3.6)            | 3(6.8)             | 0.21  |
| Composite of cardiovascular death, myocardial infarction, or stroke | 62(2.3)            | 3(6.8)             | 0.09  |
| Cardiovascular death                                                | 12(0.5)            | 0(0)               | 1.00  |
| Myocardial infarction                                               | 29(1.1)            | 3(6.8)             | 0.01  |
| Ischemia-driven revascularization                                   | 68(2.6)            | 3(6.8)             | 0.11  |
| <b>Bifurcation PCI</b>                                              | <b>No (N=2682)</b> | <b>Yes (N=15)</b>  |       |
| Primary ischemic outcome                                            | 97(3.6)            | 1(6.7)             | 0.43  |
| Composite of cardiovascular death, myocardial infarction, or stroke | 64(2.4)            | 1(6.7)             | 0.31  |
| Cardiovascular death                                                | 12(0.4)            | 0(0)               | 1.00  |
| Myocardial infarction                                               | 31(1.2)            | 1(6.7)             | 0.16  |
| Ischemia-driven revascularization                                   | 70(2.6)            | 1(6.7)             | 0.33  |

Abbreviations: PCI, percutaneous coronary intervention



**eTable 5. Outcomes by High Ischemic Risk and Antiplatelet Strategy (Per-Protocol)**

|                                                                     | AMI with high ischemic risk<br>(n=1,219) |                              |                  |                | AMI without high ischemic risk<br>(n=1,161) |                              |                   |                | <i>P</i> value for interaction |
|---------------------------------------------------------------------|------------------------------------------|------------------------------|------------------|----------------|---------------------------------------------|------------------------------|-------------------|----------------|--------------------------------|
|                                                                     | De-escalation group (n=616)              | Active control group (n=603) | HR (95% CI)      | <i>P</i> value | De-escalation group (n=592)                 | Active control group (n=569) | HR (95% CI)       | <i>P</i> value |                                |
| Primary ischemic outcome                                            | 28 (4.6)                                 | 29 (4.8)                     | 0.93 (0.55-1.56) | 0.78           | 12 (2.0)                                    | 16 (2.8)                     | 0.71 (0.34-1.51)  | 0.38           | 0.57                           |
| BARC type 2, 3 or 5 bleeding                                        | 17 (2.8)                                 | 30 (5.0)                     | 0.55 (0.30-0.99) | 0.05           | 16 (2.7)                                    | 34 (6.0)                     | 0.44 (0.25-0.81)  | 0.01           | 0.64                           |
| Net adverse clinical events                                         | 43 (7.0)                                 | 58 (9.6)                     | 0.71 (0.48-1.05) | 0.08           | 26 (4.4)                                    | 47 (8.3)                     | 0.52 (0.32-0.84)  | 0.01           | 0.33                           |
| Composite of cardiovascular death, myocardial infarction, or stroke | 15 (2.4)                                 | 20 (3.3)                     | 0.73 (0.37-1.42) | 0.61           | 8 (1.4)                                     | 14 (2.5)                     | 0.54 (0.23-1.29)  | 0.17           | 0.61                           |
| All-cause death                                                     | 6 (1.0)                                  | 8 (1.3)                      | 0.73 (0.25-2.09) | 0.55           | 4 (0.7)                                     | 1 (0.2)                      | 3.81 (0.43-34.09) | 0.23           | 0.18                           |
| Cardiovascular death                                                | 3 (0.5)                                  | 5 (0.8)                      | 0.58 (0.14-2.43) | 0.46           | 2 (0.3)                                     | 1 (0.2)                      | 1.90 (0.17-20.99) | 0.60           | 0.40                           |
| Myocardial infarction                                               | 10 (1.6)                                 | 12 (2.0)                     | 0.80 (0.35-1.85) | 0.60           | 1 (0.2)                                     | 7 (1.2)                      | 0.14 (0.02-1.10)  | 0.06           | 0.12                           |
| Ischemic stroke                                                     | 1 (0.2)                                  | 3 (0.5)                      | 0.33 (0.03-3.16) | 0.34           | 5 (0.8)                                     | 4 (0.7)                      | 1.20 (0.32-4.46)  | 0.79           | 0.33                           |
| Ischemia-driven revascularization                                   | 24 (3.9)                                 | 22 (3.7)                     | 1.05 (0.59-1.87) | 0.87           | 5 (0.8)                                     | 11 (1.9)                     | 0.43 (0.15-1.24)  | 0.12           | 0.15                           |
| Stent thrombosis                                                    | 3 (0.5)                                  | 2 (0.3)                      | 1.44 (0.24-8.62) | 0.69           | 0 (0.0)                                     | 1 (0.2)                      | -                 | -              | 0.99                           |
| BARC type 2 bleeding                                                | 12 (2.0)                                 | 22 (3.7)                     | 0.53 (0.26-1.07) | 0.07           | 13 (2.2)                                    | 25 (4.4)                     | 0.49 (0.25-0.96)  | 0.04           | 0.90                           |
| BARC type 3 or 5 bleeding                                           | 8 (1.3)                                  | 11 (1.8)                     | 0.71 (0.28-1.76) | 0.46           | 4 (0.7)                                     | 13 (2.3)                     | 0.29 (0.10-0.90)  | 0.03           | 0.23                           |

Abbreviations: AMI, acute myocardial infarction; BARC, bleeding academic research consortium; MI, myocardial infarction

**eTable 6. Major Post-Hoc Study of Randomized Controlled Trials Investigating De-Escalation Antiplatelet Strategy in ACS/AMI Patients Who Underwent Complex PCI or Had High Ischemic Risk**

|                                  | TALOS-AMI                                                                                                                                                 | TWILIGHT <sup>4</sup>                                                                                                                                                                                                    | Global Leaders <sup>5</sup>                                                                                                                | STOPDAPT-2 <sup>6</sup>                                                                                                                                                | TICO <sup>7</sup>                                                                                                                                                                      | HOST-REDUCE-POLYTECH-ACS <sup>8</sup>                                                                                                     |
|----------------------------------|-----------------------------------------------------------------------------------------------------------------------------------------------------------|--------------------------------------------------------------------------------------------------------------------------------------------------------------------------------------------------------------------------|--------------------------------------------------------------------------------------------------------------------------------------------|------------------------------------------------------------------------------------------------------------------------------------------------------------------------|----------------------------------------------------------------------------------------------------------------------------------------------------------------------------------------|-------------------------------------------------------------------------------------------------------------------------------------------|
| <b>Population</b>                | 1371 AMI patients with high ischemic risk (Clinical risk factor + Complex PCI)                                                                            | 2342 CAD patients (64% ACS) with high ischemic risk (clinical risk factor + Complex PCI)                                                                                                                                 | 4570 CAD patients (49% ACS) with Complex PCI                                                                                               | 509 CAD patients (32% ACS) with Complex PCI                                                                                                                            | 1473 ACS (68% AMI) patients with high ischemic risk (Clinical risk factor + Complex PCI)                                                                                               | 705 ACS (42% AMI) patients with Complex PCI                                                                                               |
| <b>Definition of Complex PCI</b> | multivessel PCI, $\geq 3$ lesions treated, total stent length $>60$ mm, $\geq 3$ stents implanted, left main PCI, or bifurcation PCI with $\geq 2$ stents | 3 vessels treated, $\geq 3$ lesions treated, total stent length $>60$ mm, bifurcation with 2 stents implanted, atherectomy device use, left main PCI, surgical bypass graft or chronic total occlusion as target lesions | multivessel PCI, $\geq 3$ stents implanted, $\geq 3$ lesions treated, bifurcation PCI with $\geq 2$ stents, or total stent length $>60$ mm | 3 vessels treated, $\geq 3$ stents implanted, $\geq 3$ lesions treated, bifurcation with 2 stents, $>60$ mm total stent lengths, and target of chronic total occlusion | $\geq 3$ stents implanted, total stent length $>60$ mm, complex procedures (chronic total occlusion, left main occlusion, or bifurcation plaques remedied using the 2-stent technique) | $\geq 3$ stents implanted, $\geq 3$ lesions treated, bifurcation PCI, total stent length $\geq 60$ mm, left main PCI, heavy calcification |
| <b>Timing of de-escalation</b>   | 1 month after PCI                                                                                                                                         | 3 months after PCI                                                                                                                                                                                                       | 1 month after PCI                                                                                                                          | 1 month after PCI                                                                                                                                                      | 3 months after PCI                                                                                                                                                                     | 1 month after PCI                                                                                                                         |
| <b>Method of de-escalation</b>   | Unguided de-escalation with clopidogrel for 11 months                                                                                                     | Ticagrelor monotherapy for 12 months                                                                                                                                                                                     | Ticagrelor monotherapy for 11 months                                                                                                       | Clopidogrel monotherapy for 11 months                                                                                                                                  | Ticagrelor monotherapy for 9 months                                                                                                                                                    | Prasugrel dose de-escalation for 11 months                                                                                                |

|                                                 |                                                                                    |                                    |                                                                      |                                                                         |                                                                                    |                                                                       |
|-------------------------------------------------|------------------------------------------------------------------------------------|------------------------------------|----------------------------------------------------------------------|-------------------------------------------------------------------------|------------------------------------------------------------------------------------|-----------------------------------------------------------------------|
| <b>Antiplatelet strategy of the control arm</b> | DAPT with ticagrelor for 12 months                                                 | DAPT with ticagrelor for 15 months | DAPT with ticagrelor (ACS) or clopidogrel (stable CAD) for 12 months | DAPT with clopidogrel for 12 months                                     | DAPT with ticagrelor for 12 months                                                 | DAPT with prasugrel for 12 months                                     |
| <b>Ischemic outcome</b>                         | CV death, MI, ischemic stroke, ischemic-driven revascularization, stent thrombosis | CV death, MI, or ischemic stroke   | All-cause death, any stroke, any MI, any revascularization           | CV death, MI, definite stent thrombosis, ischemic or hemorrhagic stroke | All-cause death, MI, stent thrombosis, stroke, and target vessel revascularization | CV death, nonfatal MI, stent thrombosis, and repeat revascularization |
| <b>Experimental arm</b>                         | 4.7%                                                                               | 3.6%                               | 9.4%                                                                 | 1.7%                                                                    | 3.3%                                                                               | 5.3%                                                                  |
| <b>Control arm</b>                              | 5.3%                                                                               | 4.8%                               | 11.9%                                                                | 3.0%                                                                    | 4.5%                                                                               | 6.0%                                                                  |
| <b>Bleeding outcome</b>                         | BARC 2,3,5                                                                         | BARC 2,3,5                         | BARC 3,5                                                             | TIMI major and minor                                                    | TIMI major                                                                         | BARC 2,3,5                                                            |
| <b>Experimental arm</b>                         | 3.2%                                                                               | 4.2%                               | 1.8%                                                                 | 0%                                                                      | 2.8%                                                                               | 1.8%                                                                  |
| <b>Control arm</b>                              | 4.9%                                                                               | 7.7%                               | 2.0%                                                                 | 2.3%                                                                    | 3.7%                                                                               | 6.9%                                                                  |
| <b>Follow up duration</b>                       | 12 months                                                                          | 15 months                          | 12 months                                                            | 12 months                                                               | 12 months                                                                          | 12 months                                                             |

Abbreviations: ACS, acute coronary syndrome; AMI, acute myocardial infarction; BARC, bleeding academic research consortium; CAD, coronary artery disease; CV, cardiovascular; DAPT, dual antiplatelet therapy; MI, myocardial infarction; PCI, percutaneous coronary intervention; TIMI, thrombolysis in myocardial infarction.

#### References

- Dangas G, Baber U, Sharma S, et al. Ticagrelor With or Without Aspirin After Complex PCI. *J Am Coll Cardiol*. 2020 May 19;75(19):2414-2424.
- Serruys PW, Takahashi K, Chichareon P, et al. Impact of long-term ticagrelor monotherapy following 1-month dual antiplatelet therapy in patients who underwent complex percutaneous coronary intervention: insights from the Global Leaders trial. *Eur Heart J*. 2019 Aug 14;40(31):2595-2604.

6. Yamamoto K, Watanabe H, Morimoto T, et al. STOPDAPT-2 Investigators. Very Short Dual Antiplatelet Therapy After Drug-Eluting Stent Implantation in Patients Who Underwent Complex Percutaneous Coronary Intervention: Insight From the STOPDAPT-2 Trial. *Circ Cardiovasc Interv*. 2021 May;14(5):e010384.
7. Lee SJ, Lee YJ, Kim BK, et al. Ticagrelor Monotherapy Versus Ticagrelor With Aspirin in Acute Coronary Syndrome Patients With a High Risk of Ischemic Events. *Circ Cardiovasc Interv*. 2021 Aug;14(8):e010812.
8. Hwang D, Lim YH, Park KW, et al. HOST-RP-ACS investigators. Prasugrel Dose De-escalation Therapy After Complex Percutaneous Coronary Intervention in Patients With Acute Coronary Syndrome: A Post Hoc Analysis From the HOST-REDUCE-POLYTECH-ACS Trial. *JAMA Cardiol*. 2022 Apr 1;7(4):418-426.

**eFigure 1. Patient Flow Diagram of the Present Study**

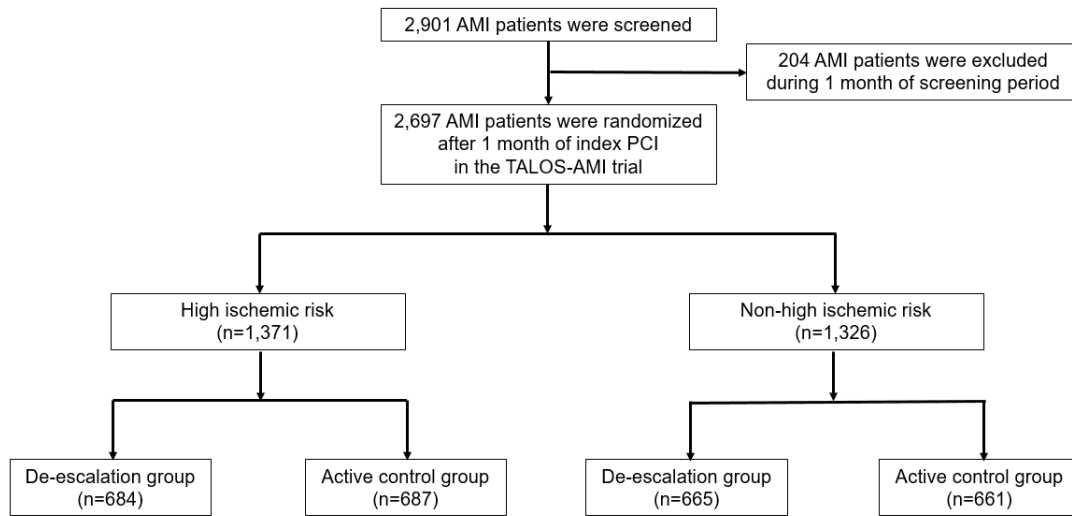

Abbreviations: AMI, acute myocardial infarction; PCI, percutaneous coronary intervention; TALOS-AMI, Ticagrelor versus Clopidogrel in Stabilized Patients with Acute Myocardial Infarction.

**eFigure 2. Impact of High Ischemic Risk in Stabilized Post-Myocardial Infarction Patients**

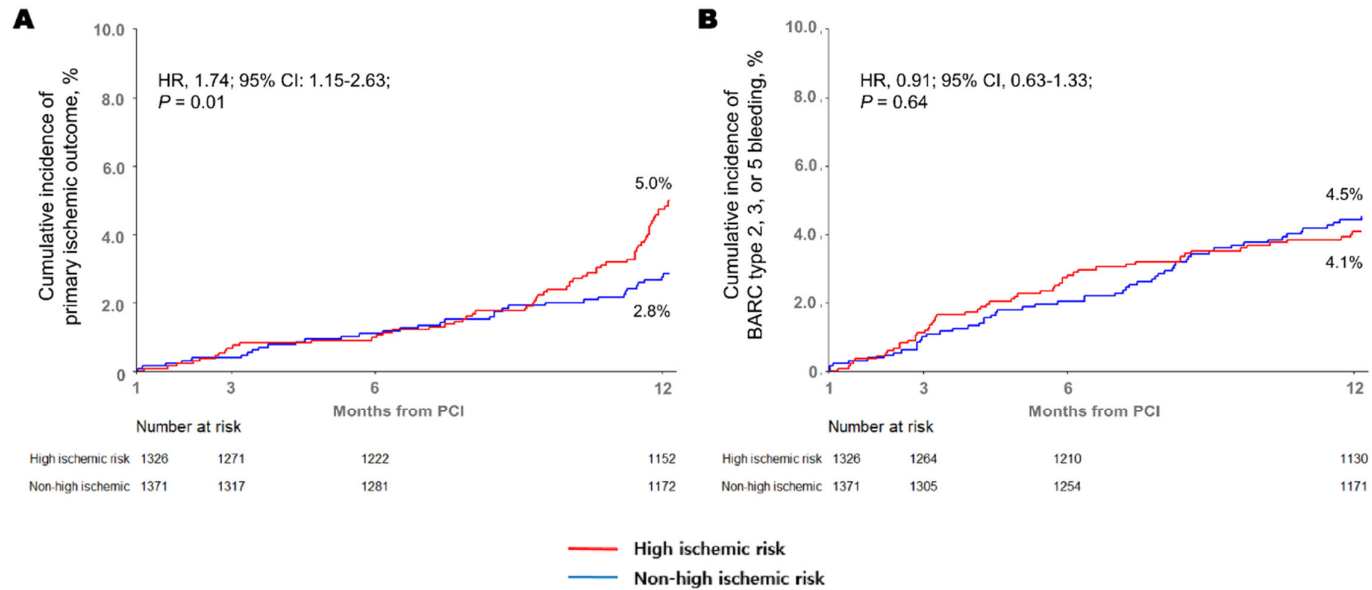

Patients with high ischemic risk had a significantly higher risk of primary ischemic outcomes than those without (A). The incidence of BARC type 2, 3 or 5 bleeding was comparable between the two groups (B).

Abbreviations: BARC, Bleeding Academic Research Consortium; PCI, percutaneous coronary intervention.

**eFigure 3. Clinical Outcomes of the Antiplatelet Strategy (Per-Protocol)**

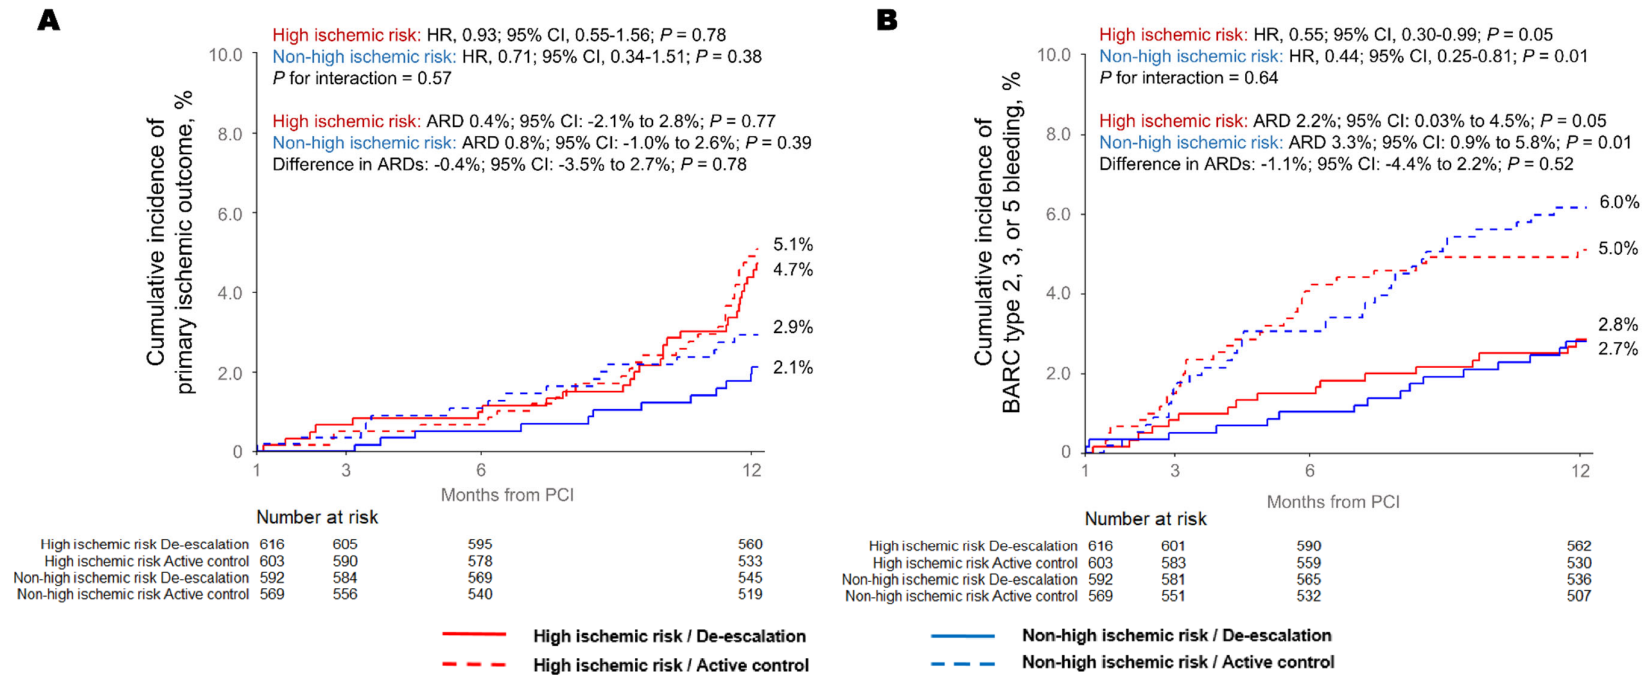

In the per-protocol analysis, there was no significant difference in the primary ischemic outcomes between the de-escalation and ticagrelor-based dual-antiplatelet therapy strategies in patients with high ischemic risk (A). With regard to BARC type 2, 3 or 5 bleeding, the de-escalation strategy significantly lowered the risk in both patients with and without high ischemic risk, demonstrating consistent results (B).

Abbreviations: ARD, absolute risk difference; BARC, Bleeding Academic Research Consortium; PCI, percutaneous coronary intervention.

**eFigure 4. Subgroup Analysis in Patients With High Ischemic Risk**

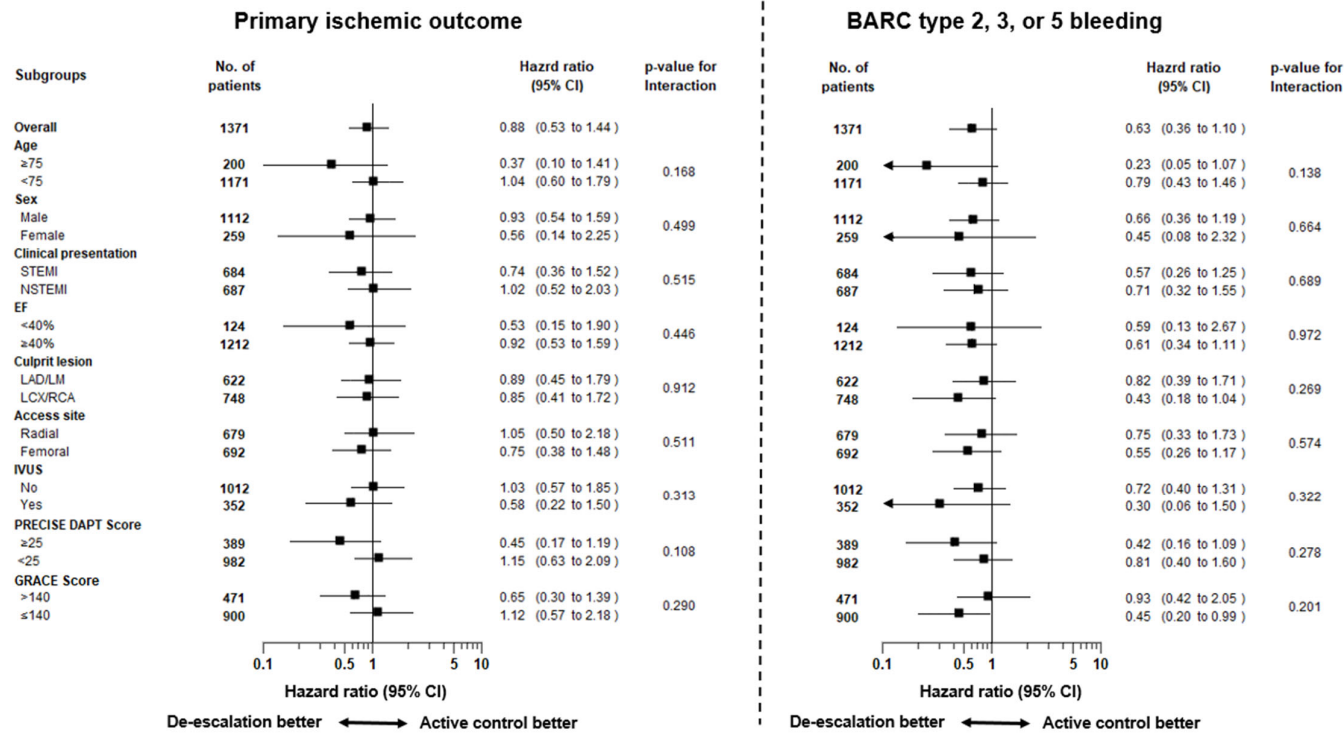

The treatment effect of the de-escalation versus ticagrelor-based dual-antiplatelet therapy strategy on the primary ischemic outcome and BARC type 2, 3 or 5 bleeding were consistent in subgroups classified by clinical and procedural characteristics.

Abbreviations: BARC, Bleeding Academic Research Consortium; EF, ejection fraction; GRACE, Global Registry of Acute Coronary Events; IVUS, intravascular ultrasonography; LAD, left anterior descending; LCX, left circumflex; LM, left main; NSTEMI, non-ST-segment elevation myocardial infarction; PRECISE-DAPT, predicting bleeding complications in patients undergoing stent implantation and subsequent dual antiplatelet therapy; RCA, right coronary artery; STEMI, ST-segment elevation myocardial infarction.



## eReferences

1. Thygesen K, Alpert JS, Jaffe AS, et al. Third Universal Definition of Myocardial Infarction. ESC/ACCF/AHA/WHF Task Force for the Universal Definition of Myocardial Infarction. *Circulation*. 2012;126(16):2020–35.
2. Cutlip DE, Windecker S, Mehran R, et al. Clinical end points in coronary stent trials: a case for standardized definitions. *Circulation*. 2007 May 1;115(17):2344-51.
3. Mehran R, Rao S V., Bhatt DL, et al. Standardized bleeding definitions for cardiovascular clinical trials: A consensus report from the bleeding academic research consortium. *Circulation*. 2011;123(23):2736–47.
4. Dangas G, Baber U, Sharma S, et al. Ticagrelor With or Without Aspirin After Complex PCI. *J Am Coll Cardiol*. 2020 May 19;75(19):2414-2424.
5. Serruys PW, Takahashi K, Chichareon P, et al. Impact of long-term ticagrelor monotherapy following 1-month dual antiplatelet therapy in patients who underwent complex percutaneous coronary intervention: insights from the Global Leaders trial. *Eur Heart J*. 2019 Aug 14;40(31):2595-2604.
6. Yamamoto K, Watanabe H, Morimoto T, et al. STOPDAPT-2 Investigators. Very Short Dual Antiplatelet Therapy After Drug-Eluting Stent Implantation in Patients Who Underwent Complex Percutaneous Coronary Intervention: Insight From the STOPDAPT-2 Trial. *Circ Cardiovasc Interv*. 2021 May;14(5):e010384.
7. Lee SJ, Lee YJ, Kim BK, et al. Ticagrelor Monotherapy Versus Ticagrelor With Aspirin in Acute Coronary Syndrome Patients With a High Risk of Ischemic Events. *Circ Cardiovasc Interv*. 2021 Aug;14(8):e010812.
8. Hwang D, Lim YH, Park KW, et al. HOST-RP-ACS investigators. Prasugrel Dose De-escalation Therapy After Complex Percutaneous Coronary Intervention in Patients With Acute Coronary Syndrome: A Post Hoc Analysis From the HOST-REDUCE-POLYTECH-ACS Trial. *JAMA Cardiol*. 2022 Apr 1;7(4):418-426.
