# Supplementary material
Source: PubMed Central journal article supplement (PMC10733848)
Supplement: jamacardiol-e234587-s004.pdf [file jamacardiol-e234587-s004.pdf]

\*Indicates required information. Only first name, last name, and suffix will appear in PubMed.

| <b>*Group Name(s): TALOS-AMI Investigators</b> |                   |                              |                  |                                        |                                               |                                                         |                                                                                            |
|------------------------------------------------|-------------------|------------------------------|------------------|----------------------------------------|-----------------------------------------------|---------------------------------------------------------|--------------------------------------------------------------------------------------------|
| <b>*First Name and Middle Initial(s)</b>       | <b>*Last Name</b> | <b>*Suffix (eg, Jr, III)</b> | Academic Degrees | Institution                            | Location (city, state/province, country)      | Role or Contribution, eg, chair, principal investigator | Group (if more than 1 Group listed in the byline and/or Subgroup (eg, Steering Committee)) |
| Myung Ho                                       | Jeong             |                              | MD, PhD          | Chonnam National university hospital   | Gwangju, Republic of Korea                    | PI                                                      | Steering Committee                                                                         |
| Chul-Soo                                       | Park              |                              | MD, PhD          | Yeouido St. Mary's hospital            | Seoul, Republic of Korea                      | PI                                                      | Steering Committee                                                                         |
| Woo Seung                                      | Shin              |                              | MD, PhD          | Uijeongbu St. Mary's hospital          | Uijeongbu-si, Gyeonggi-do, Republic of Korea  | PI                                                      | Steering Committee                                                                         |
| Dong Bin                                       | Kim               |                              | MD, PhD          | St. Paul's hospital                    | Seoul, Republic of Korea                      | PI                                                      | Steering Committee                                                                         |
| Sang Shik                                      | Jung              |                              | MD, PhD          | Gangneung Asan hospital                | Gangneung-si, Gangwon-do, Republic of Korea   | PI                                                      | Steering Committee                                                                         |
| Byung Ryeol                                    | Cho               |                              | MD, PhD          | Gangwon university hospital            | Chuncheon-si, Gangwon-do, Republic of Korea   | PI                                                      | Steering Committee                                                                         |
| Jin Shin                                       | Ko                |                              | MD, PhD          | Kyungsang National university hospital | Jinju-si, Gyeongsangnam-do, Republic of Korea | PI                                                      | Steering Committee                                                                         |
| Won                                            | Kim               |                              | MD, PhD          | Kyunghee university hospital           | Seoul, Republic of Korea                      | PI                                                      | Steering Committee                                                                         |
| Seung Ho                                       | Huh               |                              | MD, PhD          | Keimyung university hospital           | Daegu, Republic of Korea                      | PI                                                      | Steering Committee                                                                         |
| Ki Sik                                         | Kim               |                              | MD, PhD          | Daegu Catholic university hospital     | Daegu, Republic of Korea                      | PI                                                      | Steering Committee                                                                         |
| Sang Hyeon                                     | Kim               |                              | MD, PhD          | Boramae hospital                       | Seoul, Republic of Korea                      | PI                                                      | Steering Committee                                                                         |
| Chang Hyeon                                    | Cho               |                              | MD, PhD          | St. Carollo general hospital           | Suncheon-si, Jeollanam-do, Republic of Korea  | PI                                                      | Steering Committee                                                                         |

## Supplemental Online Content: Nonauthor Collaborators

\*Indicates required information. Only first name, last name, and suffix will appear in PubMed.

| *First Name and Middle Initial(s) | *Last Name | *Suffix (eg, Jr, III) | Academic Degrees | Institution                               | Location (city, state/province, country)          | Role or Contribution, eg, chair, principal investigator | Group (if more than 1 Group listed in the byline) and/or Subgroup (eg, Steering Committee) |
|-----------------------------------|------------|-----------------------|------------------|-------------------------------------------|---------------------------------------------------|---------------------------------------------------------|--------------------------------------------------------------------------------------------|
| Sang Ho                           | Park       |                       | MD, PhD          | Soonchunhyang university Cheonan hospital | Cheonan-si, Chungcheongnam-di, Republic of Korea  | PI                                                      | Steering Committee                                                                         |
| Myung Ho                          | Yoon       |                       | MD, PhD          | Ajou university hospital                  | Suwon-si, Gyeonggi-do, Republic of Korea          | PI                                                      | Steering Committee                                                                         |
| Jong Sun                          | Park       |                       | MD, PhD          | Youngnam university hospital              | Daegu, Republic of Korea                          | PI                                                      | Steering Committee                                                                         |
| Kyung Min                         | Park       |                       | MD, PhD          | Ulsan university hospital                 | Ulsan, Republic of Korea                          | PI                                                      | Steering Committee                                                                         |
| Seoung Hwan                       | Lee        |                       | MD, PhD          | Wonju Severance hospital                  | Wonju-si, Gangwon-do, Republic of Korea           | PI                                                      | Steering Committee                                                                         |
| Kyung Tae                         | Chung      |                       | MD, PhD          | Eulji university hospital                 | Daejeon, Republic of Korea                        | PI                                                      | Steering Committee                                                                         |
| Joon Hyeong                       | Do         |                       | MD, PhD          | Inje university Ilsan Baek hospital       | Ilsan-si, Gyeonggi-do, Republic of Korea          | PI                                                      | Steering Committee                                                                         |
| Sang Wook                         | Kim        |                       | MD, PhD          | Chungang university hospital              | Seoul, Republic of Korea                          | PI                                                      | Steering Committee                                                                         |
| Joo Yeol                          | Baek       |                       | MD, PhD          | Cheongju St. Mary's hospital              | Cheongju-si, Chungcheongbuk-do, Republic of Korea | PI                                                      | Steering Committee                                                                         |
| Byung Joo                         | Shim       |                       | MD, PhD          | Pohang St. Mary's hospital                | Pohang-si, Gyeongsangbuk-do, Republic of Korea    | PI                                                      | Steering Committee                                                                         |
| Ki Chul                           | Sung       |                       | MD, PhD          | Kangbook Samsung hospital                 | Seoul, Republic of Korea                          | PI                                                      | Steering Committee                                                                         |
| Ju Hyun                           | Oh         |                       | MD, PhD          | Samsung Changwon hospital                 | Changwon-si, Gyeongsangnam-do, Republic of Korea  | PI                                                      | Steering Committee                                                                         |
| Kwang Soo                         | Cha        |                       | MD, PhD          | Busan university hospital                 | Busan, Republic of Korea                          | PI                                                      | Steering Committee                                                                         |

Supplemental Online Content: Nonauthor Collaborators

\*Indicates required information. Only first name, last name, and suffix will appear in PubMed.

| <b>*First Name and Middle Initial(s)</b> | <b>*Last Name</b> | <b>*Suffix (eg, Jr, III)</b> | Academic Degrees | Institution                           | Location (city, state/province, country)         | Role or Contribution, eg, chair, principal investigator | Group (if more than 1 Group listed in the byline) and/or Subgroup (eg, Steering Committee) |
|------------------------------------------|-------------------|------------------------------|------------------|---------------------------------------|--------------------------------------------------|---------------------------------------------------------|--------------------------------------------------------------------------------------------|
| Young Hoon                               | Cho               |                              | MD, PhD          | Changwon Kyunsang university hospital | Changwon-si, Gyeongsangnam-do, Republic of Korea | PI                                                      | Steering Committee                                                                         |
| Jae Sik                                  | Jang              |                              | MD, PhD          | Inje university Busan Baek hospital   | Busan, Republic of Korea                         | PI                                                      | Steering Committee                                                                         |
| Jin Man                                  | Cho               |                              | MD, PhD          | Gangdong Kyunghee university hospital | Seoul, Republic of Korea                         | PI                                                      | Steering Committee                                                                         |
| Jang Hoon                                | Lee               |                              | MD, PhD          | Kyungbook university hospital         | Daegu, Republic of Korea                         | PI                                                      | Steering Committee                                                                         |
