# Supplementary material
Source: PubMed Central journal article supplement (PMC10733848)
Supplement: jamacardiol-e234587-s005.pdf [file jamacardiol-e234587-s005.pdf]

## Data Sharing Statement

Lee. Dual Antiplatelet Therapy De-Escalation in Stabilized Myocardial Infarction With High Ischemic Risk. *JAMA Cardiol.* Published December 20, 2023.

doi:10.1001/jamacardio.2023.4587

### Data

**Data available:** No

### Additional Information

**Explanation for why data not available:** The TALOS-AMI trial is planned to continue follow-up. Until the end of the follow-up, no individual participant data will be available.
